# Supplementary material for: National CO 2 budgets (2015–2020) inferred from atmospheric CO 2 observations in support of the Global Stocktake
Source: Copernicus journal article supplement (doi:10.5194/essd-2022-213), 2022-07-12
Supplement: Supplementary file [file essd-2022-213-AC2-supplement.pdf]

We appreciated the constructive comments of the reviewers. We have addressed the comments below. Reviewer/editor comments are shown in bold with our responses in blue. Line numbers refer to the tracked changes manuscript, and changes to the text are underlined.

Both reviewers asked for the inclusion of a new section demonstrating how the top-down estimates described in this dataset can be compared to National Greenhouse Gas Inventories (NGHGIs) submitted to the UNFCCC. Therefore, we have added a new section (Sect. 8) addressing this concern:

L628-657: “8 Comparison with national inventories

Here we demonstrate how the dataset presented here can be compared with national greenhouse gas inventories (NGHGIs) reported under the UNFCCC, which were downloaded from [https://di.unfccc.int/flex\\_annex1](https://di.unfccc.int/flex_annex1). We also refer the reader to Chapter 6.10.2 in Volume 1 of IPCC (2019) for additional discussion of comparing top-down estimates with NGHGIs. The fossil fuel emissions in Byrne et al. (2022) can be compared with the combined emissions from the energy and IPPU (Energy+IPPU) categories. In both cases, these estimates account for anthropogenic CO<sub>2</sub> emissions from the burning of fossil fuels and production of cement and other materials. We expect these estimates to generally be in good agreement, as they are similarly based on bottom-up accounting for national totals. However, the estimates may diverge when there is missing activity data, particularly in non-annex 1 countries and more recent years (Andrew, 2020).

$\Delta C_{\text{loss}}$  can be compared to the combined emissions and removals from the agriculture, LULUCF, and waste (Agr+LULUCF+Waste) categories. These quantities are not identical, with the most important difference being that NGHGIs are only for managed land, while  $\Delta C_{\text{loss}}$  includes both managed and unmanaged lands. Therefore, caution is needed for parties with large unmanaged land areas (e.g., Canada or the Russian Federation). Another difference from NGHGIs is that  $\Delta C_{\text{loss}}$  implicitly includes deposition of carbon in water body sediments within a country (such as lakes). However, this is expected to be a small contribution. Similarly, volcanic CO<sub>2</sub> emissions and are implicitly included in  $\Delta C_{\text{loss}}$  but are also believed to be small contributions (global subaerial volcanic CO<sub>2</sub> emissions are  $\sim 0.05 \text{ PgCO}_2 \text{ yr}^{-1}$ , Fischer et al., 2019). It is worth noting that NGHGIs require estimates of turnover times for wood products in producing countries, as these can have lifetimes of decades to centuries (see Appendix 3a.1 of Penman et al., 2003). No such estimate is needed for the top-down methods as emissions from decaying wood products will be implicitly incorporated in NCE. Therefore, top-down methods only need to account for the lateral movement of wood products from the region where the carbon is sequestered to the region where the wood products are used and decompose.

For this analysis, we compare NGHGIs and our dataset for three entities: the USA, European Union plus the United Kingdom (EU27+UK), and Australia. These were chosen for two reasons. First, NCE is better constrained by atmospheric CO<sub>2</sub> data over these relatively large regions. This is reflected in the FUR metric, which gives values of 0.76–0.91 for the USA (meaning a 76–91% uncertainty reduction), 0.38–0.51 for EU27, and 0.45–0.78 for Australia. Second, each of these entities has small unmanaged land areas, making this more of an apples-to-apples comparison. 95% of the USA is managed, with most unmanaged land being in the state of Alaska (Ogle et al.,

2018). Similarly, all land in the EU27+UK is considered managed except for 5% of France’s territory (Petrescu et al., 2021).

Figure 15 shows timeseries of emissions and removals from NGHGs and Byrne et al. (2022) over 2015–2020. We focus our analysis on the 2015–2020 mean estimates, as top-down methods are expected to be more sensitive to IAV in the carbon cycle than NGHGI methods for individual years. Strong agreement is found between the NGHGI Energy+IPPU emissions and the fossil fuel emissions in Byrne et al. (2022), while larger differences are found between Agr+LULUCF+Waste and  $\Delta C_{loss}$ . Averaged over the 2015–2020 period, we obtain statistically significant differences between Agr+LULUCF+Waste and  $\Delta C_{loss}$  for the USA and EU27+UK for each experiment (based on student t-test at 0.05 significance level). In each case the top-down estimates suggest greater carbon sequestration by land, with mean differences of 0.59–0.91 Pg  $CO_2\ yr^{-1}$  for the USA and 0.99–1.79 Pg  $CO_2\ yr^{-1}$  for the EU27+UK. The reasons for these differences are unclear but are not expected to be explained by removals in unmanaged lands. It is possible that NGHGI methods miss or underestimate sink processes and/or that there are biases affecting the top-down estimates (see. Sec. 9 for remaining challenges in top-down estimates). We encourage further research and comparison between the NGHGI and top-down research communities to better understand the sources of these differences.”

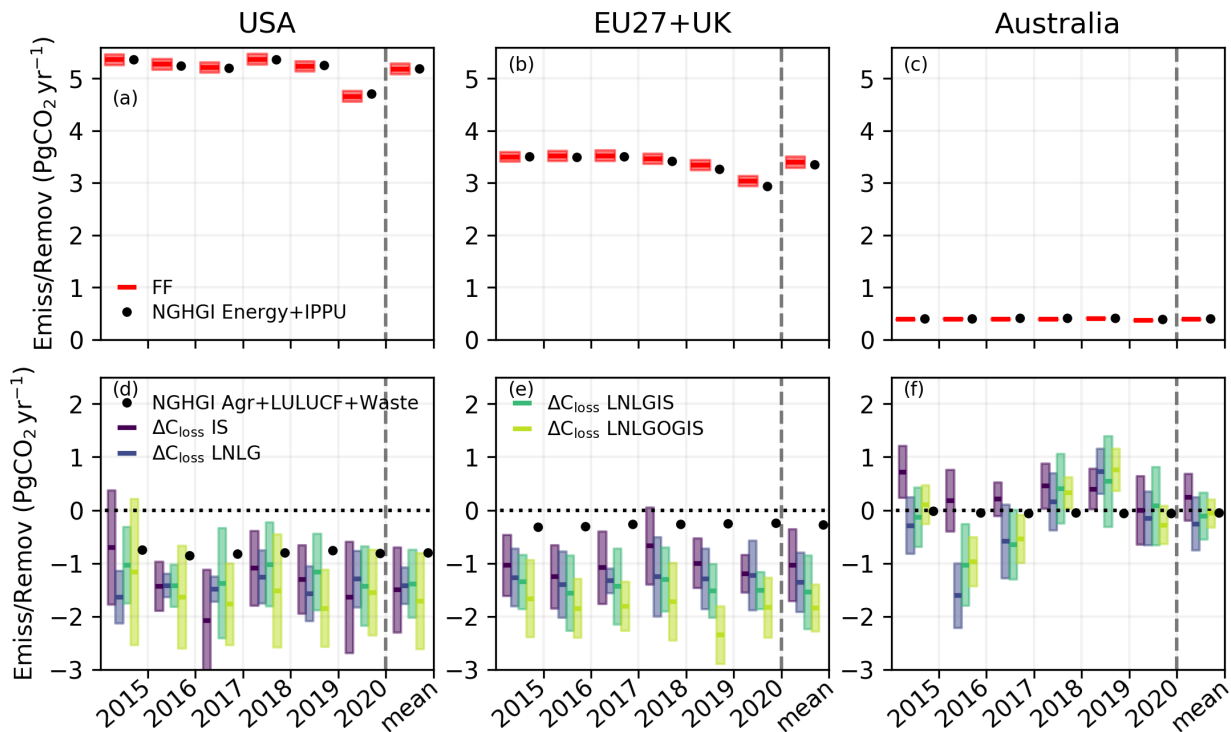

Figure 15. Emissions and removals of CO<sub>2</sub> from the (a-c) Energy and IPPU categories and (d-f) Agriculture, LULUCF and waste categories reported in NGHGs and  $\Delta C_{loss}$  for four OCO-2 MIP experiments (IS, LNLG, LNLGIS, LNLGOGIS). Values are provided for individual years and the 2015–2020 mean.

## Reviewer 1

### General comments

**Since this study is aimed at “informing countries’ carbon budgets”, as stated in the abstract, I am missing a bit a section on how the carbon stock changes defined in this study compare to what is required by the UNFCCC for national reporting. Moreover, this study calculates the Net Biosphere Exchange (NBE) from the inversions and then adjusts this using the terms for crop and wood trade as well as river export to derive changes in terrestrial carbon stock. The UNFCCC guidelines on reporting also correct carbon stocks for carbon losses due to harvest. For wood, the guidelines include consideration of the turn-over rate of wood products, since many wood products have lifetimes of decades to centuries. For crop, the turn-over time is generally much shorter, order of annual, thus I would think that this term should have little affect on carbon stock changes.**

We have added a section comparing our estimates with NGHGs (please see above) and explaining that top-down methods do not require an estimate of the turnover rate for harvested wood, as the decomposition of wood products should be implicitly included in the NBE flux. What needs to be accounted for is the lateral movement of wood products from the region where carbon is fixed to the region where the wood products are used and decompose. In contrast, the bottom-up methods described in the UNFCCC guidelines need to explicitly estimate the turnover time for wood products, as the release of this carbon to the atmosphere is not captured by these methods. Further, the emissions from wood products are reported by the country that produces the product (under the responsibility of this country). The global sum of wood products used and decompose emissions is thus reported in NGHGs over the territory of producing countries, but inversions solve for spatial patterns and this is why we included explicitly the displacement of wood products and emissions at the location where they are actually released to the atmosphere. Nevertheless, both approaches should account for the impact of turnover time on wood products in stockchange estimates.

### **Specific comments**

**L135: Add a reference for the N-fertilization effect**

Added

**L209: Concerning Eq. 2, why is the carbon in crop harvest considered in the change of carbon stocks, since crop harvest is only a relatively short-term stock of carbon (turn-over on annual time scales) since this will most be consumed or used for fuel?**

When carbon is fixed on land through photosynthesis and then exported laterally and respired elsewhere (e.g., crop growth and harvest, forest growth out of which wood products are harvested), it will result in a local net carbon sink in NBE. However, this does not change the local carbon stocks as this carbon is exported. Therefore, we need to remove this lateral flux (as a global map of sinks where CO<sub>2</sub> is fixed and sources where CO<sub>2</sub> is emitted after displacement of carbon) of carbon from NBE to calculate the stock change.

**Section 2: How does the carbon stock definition compare to what is required by UNFCCC (see also the general comment)? Also, are the turn-over times of wood products considered in calculating changes in carbon stock?**

Please see new Sect 8 (posted above).

**Eq. 4: May be there is some confusion on my side, but to correct the IQR to standard deviation (SD), I would think one would need to divide by ~1.47, since the IQR includes 50% of the values while one SD includes 34%. Or where does the value of 1.35 come from?**

The conversion from IQR to standard deviation requires the use of normal tables ([https://en.wikipedia.org/wiki/Standard\\_normal\\_table](https://en.wikipedia.org/wiki/Standard_normal_table)). We have clarified this in the text, and added a reference to Hoaglin et al. (1985), where a more detailed explanation can be found:

L284-287: “The uncertainty in NCE is calculated as an (denoted  $\sigma_{\text{NCE}}$ ) of the distribution’s standard deviation using the interquartile range (IQR) of the v10 OCO-2 MIP ensemble. It is a robust estimate that requires only the middle 50% of the ensemble to be normally distributed (Hoaglin et al., 1985). Hence from the normal tables, to two decimal places:”

**L358: What is the reasoning for assuming 30% uncertainty on the crop and wood exchange fluxes?**

This value was chosen based on expert opinion. There has been no rigorous method devised to estimate the uncertainty for these values. We have clarified this in the manuscript:

L385-387: “For each  $1^\circ \times 1^\circ$  grid cell, we assume the standard deviation of the mean flux to be 30% for  $F_{\text{wood trade}}$  and  $F_{\text{crop trade}}$ , and 60% for  $F_{\text{rivers export}}$ . These uncertainty estimates are based on expert opinion as a rigorous error budget has not yet been developed for the  $1^\circ \times 1^\circ$  lateral flux estimates.”

**L415: Please change “data-model” to “observation-model” if that is what is meant since “data” can be either modelled or observed (also L419). Also, this sentence is a bit ambiguous, do the authors mean that the difference for the OG experiments is more negative in the evaluation data sets compared to experiments?**

We have replaced “data-model” with “observation-model” throughout. We have also clarified the statement about the OG bias:

L438-441: “Over  $30^\circ$ – $60^\circ$  N, where independent observations are densest, we find that the OG ensemble median is biased by -0.69 ppm against TCCON, -0.74 ppm against withheld in situ, and -0.48 ppm against withheld OCO-2 LNLG, suggesting a possible meridional bias (higher retrieved  $X_{\text{CO}_2}$  than independent observations) in the OCO-2 ocean  $X_{\text{CO}_2}$  retrievals.”

## **Reviewer 2**

### **General comments:**

**The authors put together a comprehensive analysis and study on atmospheric CO<sub>2</sub> observations, aimed in informing countries’ C budgets. The use of atmospheric observations (and OCO-2 MIP outputs in this case) is useful and greatly needed in the view**

**of future CO2M development and in the context of the Paris Agreement global reduction targets. The authors mention often the Paris Agreement and its GST but nowhere in this study UNFCCC reported estimates are presented. Do these atmospheric observations agree or not with the NGHGs, or better say complement them? How do OCO-2 MIP observations could/will be used for the “informing” purpose? I would highly recommend a section dedicated to this.**

We have added a new section (Sect 8) dedicated to comparing our estimates with NGHGs. Please see the text for this section posted at the top of this document.

### **Specific comments:**

**Introduction: The first three paragraphs contain text widely used in previous studies, references are needed, e.g. VERIFY H2020 project and references therein**

We did not copy any text but likely converged on similar wordings. Nevertheless, we are happy to acknowledge the previous work. We have added references to Petrescu et al. (2021) and Monteil et al. (2020). Please let us know if there are others that we have missed.

Petrescu, A. M. R., McGrath, M. J., Andrew, R. M., Peylin, P., Peters, G. P., Ciais, P., Broquet, G., Tubiello, F. N., Gerbig, C., Pongratz, J., Janssens-Maenhout, G., Grassi, G., Nabuurs, G.-J., Regnier, P., Lauerwald, R., Kuhnert, M., Balkovič, J., Schelhaas, M.-J., Denier van der Gon, H. A. C., Solazzo, E., Qiu, C., Pilli, R., Konovalov, I. B., Houghton, R. A., Günther, D., Perugini, L., Crippa, M., Ganzenmüller, R., Lujikx, I. T., Smith, P., Munassar, S., Thompson, R. L., Conchedda, G., Monteil, G., Scholze, M., Karstens, U., Brockmann, P., and Dolman, A. J.: The consolidated European synthesis of CO<sub>2</sub> emissions and removals for the European Union and United Kingdom: 1990–2018, *Earth System Science Data*, 13, 2363–2406, <https://doi.org/10.5194/essd-13-2363-2021>, 2021.

Monteil, G., Broquet, G., Scholze, M., Lang, M., Karstens, U., Gerbig, C., Koch, F.-T., Smith, N. E., Thompson, R. L., Lujikx, I. T., White, E., Meesters, A., Ciais, P., Ganesan, A. L., Manning, A., Mischurow, M., Peters, W., Peylin, P., Tarniewicz, J., Rigby, M., Rödenbeck, C., Vermeulen, A., and Walton, E. M.: The regional European atmospheric transport inversion comparison, EUROCOM: first results on European-wide terrestrial carbon fluxes for the period 2006–2015, *Atmospheric Chemistry and Physics*, 20, 12 063–12 091, <https://doi.org/10.5194/acp-20-12063-2020>, 2020.

**Line 27: The 5 sectors specified by the IPCC 2006 guidelines are: Energy, IPPU, Agriculture, LULUCF and Waste. The AFOLU (Agriculture + LULUCF) is defined in the 2019 Refinement to the 2006 Guidelines and IPCC ARs reports. However, in their NGHGs, countries report separates the two sectors.**

AFOLU is defined in the 2006 Guidelines and is the title of volume 4. Nevertheless, we agree that NGHGs are categorized into Energy, IPPU, Agriculture, LULUCF and Waste. We have revised the text to reflect this:

L23-39: “In support of the first GST, Parties to the Paris Agreement are compiling national greenhouse gas inventories (NGHGs) of emissions and removals, which are submitted to the United Nation Framework Convention of Climate Change (UNFCCC) and inform their progress toward the emission-reduction targets in their individual NDCs. For these inventories, emissions and removals are generally estimated using “bottom-up” approaches, wherein CO<sub>2</sub> emission estimates are based on activity data and emission factors while CO<sub>2</sub> removals by sinks are based on inventories of carbon stock changes and models, following the methods specified in the 2006 IPCC Guidelines for National Greenhouse Gas Inventories (IPCC, 2006). This approach allows for explicit characterization of CO<sub>2</sub> emissions and removals into five categories: Energy; Industrial Processes and Product Use (IPPU); Agriculture; Land Use, Land-Use Change and Forestry (LULUCF); and Waste. Bottom-up methods can provide precise and accurate country-level emission estimates when the activity data and emission factors are well quantified and understood (Petrescu et al., 2021), such as for the fossil fuel combustion category of the energy sector in many countries. However, these estimates can have considerable uncertainty when the emission processes are challenging to quantify (such as for agriculture, LULUCF, and waste) or if the activity data are inaccurate or missing. For example, Grassi et al. (2022) and McGlynn et al (2022) estimate the uncertainty on the net LULUCF CO<sub>2</sub> flux to be roughly 35% for Annex I countries and 50% for non-Annex I countries. In addition, these estimates do not capture carbon emissions and removals from unmanaged systems, which are not directly considered in the Paris Agreement, but impact the global carbon budget and growth rate of atmospheric CO<sub>2</sub>.”

**Line 30: “quantified and understood” please reference**

Added a reference

**Line 40: I would not use “verification system” but complementing, informing..**

We chose this term to be consistent with Chapter 6.10 of the 2019 refinement to the 2006 IPCC guidelines, where atmospheric inversions are discussed.

**Line 60: “several previous studies “ how about European BU vs TD studies? Ciais et al., add RECCAP2, as well as Grassi et al., 2022 preprint informing on consistent comparison for the land-se fluxes**

We have added references to Petrescu et al. (2021) and Monteil et al. (2020). The Ciais et al (2021) RECCAP-2 paper was already cited here. We don’t believe the Grassi et al. (2022) preprint is relevant to this paragraph but have added a citation to the first paragraph.

**Line 64: explain CAMS**

Defined acronym

**Line 90: comma (,) before Including**

Done.

**Lines 94-95: The first two sentences don't read well, rephrase please**

We have re-worded these sentences:

L102-108: “The burning of fossil fuels and cement production release geologic carbon to the atmosphere ( $40.0 \pm 3.3 \text{ PgCO}_2 \text{ yr}^{-1}$  or  $10.9 \pm 0.9 \text{ PgC yr}^{-1}$  over 2010–2019; Canadell et al., 2021). These emissions, along with land use activities, impact carbon cycling between atmospheric, oceanic, and biospheric reservoirs that make up a near-closed system on annual timescales. As a result, roughly half of the emitted CO<sub>2</sub> from anthropogenic sources is absorbed by terrestrial ecosystems and oceans...”

**Figure 1 caption: I think number 2 should be moved to forests/logs, to the reservoir itself (under GPP), same as its done for agriculture and water, now its on the urban areas. Add (BB) after biomass burning.**

We agree that this is not an ideal location, but the portion of the figure with the logs has a number of arrows nearby, which makes the number look ambiguous in this location as well. We feel that the current location is better, and the message can still get across with referencing the caption.

**Line 157: can add examples for DGVMs priors**

We have revised DGVM to Terrestrial biosphere model, which is more accurate given that many priors are simple diagnostic models. We have also added some examples:

L165-167: “Prior mean fluxes of net ecosystem exchange are usually obtained from terrestrial biosphere models (such as CASA, ORCHIDEE, and CARDAMOM), while prior mean air-sea fluxes...”

**Line 187 Section 2: a table summarizing all data sources for all lateral fluxes and not only would be of great help.**

We have added a table that lists the data sources and the sub-sections where more details can be found.

**Table 3.** Data sources for lateral flux estimates

| Resolution               | Flux                       | Model / Data source                   | Section     |
|--------------------------|----------------------------|---------------------------------------|-------------|
| National                 | $F_{\text{rivers export}}$ | Dynamic Land Ecosystem Model (DLEM)   | Sect. 3.3.1 |
|                          |                            | and<br>Global NEWS with COSCAT's data |             |
| National                 | $F_{\text{wood trade}}$    | UN FAO                                | Sect. 3.3.2 |
| National                 | $F_{\text{crop trade}}$    | UN FAO                                | Sect. 3.3.2 |
| $1^\circ \times 1^\circ$ | $F_{\text{rivers export}}$ | Global NEWS with COSCAT's data        | Sect. 3.3.3 |
| $1^\circ \times 1^\circ$ | $F_{\text{wood trade}}$    | UN FAO with downscaling               | Sect. 3.3.3 |
| $1^\circ \times 1^\circ$ | $F_{\text{crop trade}}$    | UN FAO with downscaling               | Sect. 3.3.3 |

**Line 190:** can reference (Fig. 1) after ocean

Done.

**Line 195:** Reco already explained (L116)

Removed redundant definition

**Line 219:** Please mention EU27

The European Union is meant to be the EU27. We have clarified, "..., the European Union (EU or EU27), ..."

**Line 228:** add "including 'those' from"...

Done.

**Line 249:** not clear to which network they belong to. In situ collection is referenced as Masarie et al., 2014, perhaps add this ref to the Abstract where you mention first in situ. It appears late in the text (line 185)

This is a special collection of in situ data made specifically for this activity. They originate from many networks across the globe, we have clarified this in the text:

L297-299: "In situ CO<sub>2</sub> measurements (Fig. 3a,d) are drawn from five data collections made available in Obspack format (Masarie et al., 2014). Those source ObsPacks and their references are listed in Table 2. These data include measurements from 55 international laboratories at 460 sites around the world."



**Line 276, Eq 4: what does 1.35 stands for?**

We have clarified this in the text and added a reference to Hoaglin et al. (1985) where a more detailed explanation can be found:

L284-287: “The uncertainty in NCE is calculated as an (denoted  $\sigma_{\text{NCE}}$ ) of the distribution’s standard deviation using the interquartile range (IQR) of the v10 OCO-2 MIP ensemble. It is a robust estimate that requires only the middle 50% of the ensemble to be normally distributed (Hoaglin et al., 1985). Hence from the normal tables, to two decimal places:”

**Line 322: reference DLEM**

added

**Line 326: please explain DIC, DOC and POC**

Defined: “...that include dissolved inorganic carbon (DIC) of atmospheric origin, dissolved organic carbon (DOC) and particulate organic carbon (POC).”

**Line 358: can you please explain why 30%?**

This value was chosen based on expert opinion. There has been no rigorous method devised to estimate the uncertainty for these values. We have clarified this in the manuscript:

L385-387: “For each  $1^\circ \times 1^\circ$  grid cell, we assume the standard deviation of the mean flux to be 30% for  $F_{\text{wood trade}}$  and  $F_{\text{crop trade}}$ , and 60% for  $F_{\text{rivers export}}$ . These uncertainty estimates are based on expert opinion as a rigorous error budget has not yet been developed for the  $1^\circ \times 1^\circ$  lateral flux estimates.”

**Line 491: FUR already explained in Fig. 7 caption, then in 5.2, then again here**

Removed this redundant definition.

**Line 538: How about future CO2M mission, what do authors recommend for estimating fluxes at smaller scale (regions, cities etc.)**

The coarse-resolution global models used here are insufficient for monitoring urban emissions from future missions, such as CO2M. These will require higher spatial resolution to resolve urban CO<sub>2</sub> plumes from cities. In most cases this will likely require regional models. This is certainly an active area of research, but it is hard to make recommendations based on the analysis here. We can only point out that the methods employed here, such as using an ensemble of inversion systems, will also be useful for quantifying errors in these applications.

**Line 721: perhaps worth mentioning RECCAP2 initiative. I think this paragraph should be in the Introduction**

We have added a mention of RECCAP-2 in this section. We have put it under international activities since it is coordinated through GCP, though with significant funding from ESA-CCI. In addition, we have highlighted the recent co-ordination by WMO:

L813-819: “Finally, there are ongoing internationally organized activities. Phase 2 of the Regional Carbon Cycle Assessment and Processes project (RECCAP-2), coordinated by the Global Carbon Project (<https://www.globalcarbonproject.org/reccap/>), has aimed to characterize regional carbon budgets. This included investigating how different data sources – including atmospheric inversion analyses – can contribute to this goal (Bastos et al, 2022; Deng et al., 2022). In addition, the WMO has hosted workshops and symposiums with the greenhouse gas monitoring community to develop a framework for sustained, internationally coordinated global greenhouse gas monitoring (e.g., <https://community.wmo.int/meetings/wmo-international-greenhouse-gas-monitoring-symposium>).”

**Line 807: agree with improving sub-national and sub-annual estimates of lateral fluxes, however its not the aim of the NGHGs.**

Agreed, this is motivated by improving top-down systems, and this research area may motivate funding of these estimates.

**Line 811: can use ‘GST’**

Done.

**Line 817: “We recommend that each party provide a mask” very well thought and optimistic, however very hard to achieve, countries do not invest in it as it’s not really required by guidelines, however several newly EU funded projects might look into it for some key countries.**

Agreed that this is hard to achieve, we are happy to hear that EU-funded projects will investigate this.

**Line 824: FUR ok, how about the distribution of the observation network?**

FUR is impacted by the distribution of the observation network, as it is a metric of how much country NCE uncertainties are reduced by the assimilation of available observations. We are unclear on the meaning of the reviewer’s question.

**Line 838: a bit more text on how this analysis should inform GSTs and countries’ budgets is needed (as for the moment GST is designed for country NGHGs only), and, as mentioned in the beginning, the UNFCCC and country reported data is missing in this study.**

Please see new Sect 8 (posted at top).

# National CO<sub>2</sub> budgets (2015–2020) inferred from atmospheric CO<sub>2</sub> observations in support of the Global Stocktake

Brendan Byrne<sup>1</sup>, David F. Baker<sup>2</sup>, Sourish Basu<sup>3,4</sup>, Michael Bertolacci<sup>5</sup>, Kevin W. Bowman<sup>1,6</sup>, Dustin Carroll<sup>7,1</sup>, Abhishek Chatterjee<sup>1</sup>, Frédéric Chevallier<sup>8</sup>, Philippe Ciais<sup>8</sup>, Noel Cressie<sup>5,1</sup>, David Crisp<sup>1</sup>, Sean Crowell<sup>9</sup>, Feng Deng<sup>10</sup>, Zhu Deng<sup>11</sup>, Nicholas M. Deutscher<sup>12</sup>, Manvendra K. Dubey<sup>13</sup>, Sha Feng<sup>14</sup>, Omaira E. García<sup>15</sup>, David W. T. Griffith<sup>12</sup>, Benedikt Herkommer<sup>16</sup>, Lei Hu<sup>17,18</sup>, Andrew R. Jacobson<sup>17,18</sup>, Rajesh Janardanan<sup>19</sup>, Sujong Jeong<sup>20</sup>, Matthew S. Johnson<sup>21</sup>, Dylan B. A. Jones<sup>10</sup>, Rigel Kivi<sup>22</sup>, Junjie Liu<sup>1,23</sup>, Zhiqiang Liu<sup>24</sup>, Shamil Maksyutov<sup>19</sup>, John B. Miller<sup>17</sup>, Scot M. Miller<sup>25</sup>, Isamu Morino<sup>19</sup>, Justus Notholt<sup>26</sup>, Tomohiro Oda<sup>27,28</sup>, Christopher W. O'Dell<sup>2</sup>, Young-Suk Oh<sup>29</sup>, Hirofumi Ohyama<sup>19</sup>, Prabir K. Patra<sup>30</sup>, Hélène Peiro<sup>9</sup>, Christof Petri<sup>26</sup>, Sajeev Philip<sup>31</sup>, David F. Pollard<sup>32</sup>, Benjamin Poulter<sup>3</sup>, Marine Remaud<sup>8</sup>, Andrew Schuh<sup>2</sup>, Mahesh K. Sha<sup>33</sup>, Kei Shiomi<sup>34</sup>, Kimberly Strong<sup>10</sup>, Colm Sweeney<sup>17</sup>, Yao Té<sup>35</sup>, Hanqin Tian<sup>36,37</sup>, Voltaire A. Velazco<sup>12,38</sup>, Mihalis Vrekoussis<sup>39,26</sup>, Thorsten Warneke<sup>26</sup>, John R. Worden<sup>1</sup>, Debra Wunch<sup>10</sup>, Yuanzhi Yao<sup>36</sup>, Jeongmin Yun<sup>20</sup>, Andrew Zammit-Mangion<sup>5</sup>, and Ning Zeng<sup>28,4</sup>

<sup>1</sup>Jet Propulsion Laboratory, California Institute of Technology, Pasadena, CA, USA

<sup>2</sup>Cooperative Institute for Research in the Atmosphere, Colorado State University, Fort Collins, CO, USA

<sup>3</sup>NASA Goddard Space Flight Center, Global Modeling and Assimilation Office, Greenbelt, MD, USA

<sup>4</sup>Earth System Science Interdisciplinary Center, College Park, MD, USA

<sup>5</sup>School of Mathematics and Applied Statistics, University of Wollongong, Australia

<sup>6</sup>Joint Institute for Regional Earth System Science and Engineering, University of California, Los Angeles, CA, USA

<sup>7</sup>Moss Landing Marine Laboratories, San José State University, Moss Landing, CA, USA

<sup>8</sup>Laboratoire des Sciences du Climat et de L'Environnement, LSCE/IPSL, CEA-CNRS-UVSQ, Université Paris-Saclay, 91191 Gif-sur-Yvette, France

<sup>9</sup>University of Oklahoma, Norman, OK, USA

<sup>10</sup>Department of Physics, University of Toronto, Toronto, Ontario, Canada

<sup>11</sup>Department of Earth System Science, Tsinghua University, Beijing, China

<sup>12</sup>Centre for Atmospheric Chemistry, School of Earth, Atmospheric and Life Sciences, University of Wollongong, Wollongong, NSW, Australia

<sup>13</sup>Earth System Observation, Los Alamos National Laboratory, Los Alamos, NM, USA

<sup>14</sup>Atmospheric Sciences and Global Change Division, Pacific Northwest National Laboratory, Richland, WA, USA

<sup>15</sup>Izaña Atmospheric Research Center (IARC), State Meteorological Agency of Spain (AEMet), Tenerife, Spain

<sup>16</sup>Institut für Meteorologie und Climate Research (IMK-ASF), Karlsruhe Institute of Technology (KIT), Karlsruhe, Germany

<sup>17</sup>NOAA Global Monitoring Laboratory, Boulder, CO, USA

<sup>18</sup>Cooperative Institute for Research in Environmental Sciences, University of Colorado Boulder, Boulder, CO, USA

<sup>19</sup>Satellite Observation Center, Earth System Division, National Institute for Environmental Studies, Tsukuba, Japan

<sup>20</sup>Department of Environmental Planning, Graduate School of Environmental Studies, Seoul National University, Seoul, Republic of Korea

<sup>21</sup>NASA Ames Research Center, Moffett Field, CA, USA

<sup>22</sup>Space and Earth Observation Centre, Finnish Meteorological Institute, Sodankylä, Finland

<sup>23</sup>Division of Geological and Planetary Sciences, California Institute of Technology, Pasadena, CA, USA

<sup>24</sup>Laboratory of Numerical Modeling for Atmospheric Sciences & Geophysical Fluid Dynamics, Institute of Atmospheric Physics, Chinese Academy of Sciences, Beijing, China

<sup>25</sup>Department of Environmental Health and Engineering, Johns Hopkins University, Baltimore, MD 21218, United States of America

<sup>26</sup>Institute of Environmental Physics, University of Bremen, Bremen, Germany

<sup>27</sup>Earth from Space Institute, Universities Space Research Association, Columbia, MD, USA

<sup>28</sup>Department of Atmospheric and Oceanic Science, University of Maryland, USA

<sup>29</sup>Global Atmosphere Watch Team, Climate Research Department, National Institute of Meteorological Sciences, Republic of Korea

<sup>30</sup>Research Institute for Global Change, Japan Agency for Marine-Earth Science and Technology (JAMSTEC), Yokohama, 236-0001, Japan

<sup>31</sup>Centre for Atmospheric Sciences, Indian Institute of Technology Delhi, New Delhi, India

<sup>32</sup>National Institute of Water & Atmospheric Research Ltd (NIWA), Lauder, New Zealand

<sup>33</sup>Royal Belgian Institute for Space Aeronomy (BIRA-IASB), Brussels, Belgium

<sup>34</sup>Japan Aerospace Exploration Agency (JAXA), Tsukuba, Japan

<sup>35</sup>Laboratoire d'Etudes du Rayonnement et de la Matière en Astrophysique et Atmosphères (LERMA-IPSL), Sorbonne Université, CNRS, Observatoire de Paris, PSL Université, 75005 Paris, France.

<sup>36</sup>International Center for Climate and Global Change Research, College of Forestry, Wildlife and Environment, Auburn University, Auburn, AL 36849, USA

<sup>37</sup>Schiller Institute for Integrated Science and Society, and Department of Earth and Environmental Sciences, Boston College, Chestnut Hill, MA 02467, USA

<sup>38</sup>Deutscher Wetterdienst (DWD), Hohenpeissenberg, Germany.

<sup>39</sup>Climate and Atmosphere Research Center (CARE-C), The Cyprus Institute, Nicosia, Cyprus

**Correspondence:** Brendan Byrne (brendan.k.byrne@jpl.nasa.gov)

**Abstract.** Accurate accounting of emissions and removals of CO<sub>2</sub> is critical for the planning and verification of emission reduction targets in support of the Paris Agreement. Here, we present a pilot dataset of country-specific net carbon exchange (NCE; fossil plus terrestrial ecosystem fluxes) and terrestrial carbon stock changes aimed at informing countries' carbon budgets. These estimates are based on “top-down” NCE outputs from the v10 Orbiting Carbon Observatory (OCO-2) modeling inter-comparison project (MIP), wherein an ensemble of inverse modeling groups conducted standardized experiments assimilating OCO-2 column-averaged dry-air mole fraction ( $X_{\text{CO}_2}$ ) retrievals (ACOS v10), in situ CO<sub>2</sub> measurements, or combinations of these data. The v10 OCO-2 MIP NCE estimates are combined with “bottom-up” estimates of fossil fuel emissions and lateral carbon fluxes to estimate changes in terrestrial carbon stocks, which are impacted by anthropogenic and natural drivers. These flux and stock change estimates are reported annually (2015–2020) as both a global 1° × 1° gridded dataset and as a country-level dataset. Across the v10 OCO-2 MIP experiments, we obtain increases in the ensemble median terrestrial carbon stocks of 3.29–4.58 PgCO<sub>2</sub> yr<sup>-1</sup> (0.90–1.25 PgC yr<sup>-1</sup>). This is a result of broad increases in terrestrial carbon stocks across the northern extratropics, while the tropics generally have stock losses but with considerable regional variability and differences between v10 OCO-2 MIP experiments. We discuss the state of the science for tracking emissions and removals using top-down methods, including current limitations and future developments towards top-down monitoring and verification systems.

15 *Copyright statement.* ©2022. California Institute of Technology, government sponsorship acknowledged.

## 1 Introduction

To reduce the risks and impacts of climate change, the Paris Agreement aims to limit the global average temperature increase to well below 2 °C above pre-industrial levels and pursue efforts to limit these increases to less than 1.5 °C. To this end, each Party to the Paris Agreement agreed to prepare and communicate successive Nationally Determined Contributions (NDCs) of greenhouse gas (GHG) emission reductions. Collective progress toward this goal of the Paris Agreement is evaluated in Global Stocktakes (GSTs), which are conducted at five-year intervals; the first GST is scheduled in 2023. The outcome of each GST is then used as input, or as a “ratchet mechanism”, for new NDCs that are meant to encourage greater ambition.

In support of the first GST, Parties to the Paris Agreement are compiling ~~inventories of GHG~~ national GHG inventories (NGHGs) of emissions and removals, ~~te~~, which are submitted to the United Nation Framework Convention of Climate Change (UNFCCC) and inform their progress toward the emission-reduction targets in their individual NDCs. ~~These inventories~~ For these inventories, emissions and removals are generally estimated using “bottom-up” approaches, wherein CO<sub>2</sub> emission estimates are based on activity data and emission factors while CO<sub>2</sub> removals by sinks are based on inventories of carbon stock changes and models, following the methods specified in the 2006 IPCC Guidelines for National GHG Inventories (IPCC, 2006). This approach allows for explicit characterization of CO<sub>2</sub> emissions and removals into ~~the five main sectors specified in the 2006 IPCC Guidelines for National Greenhouse Gas Inventories (IPCC, 2006): Energy, five categories: Energy; Industrial Processes and Product Use (IPPU); Agriculture, Forestry and Other Land Use (AFOLU), Waste, and Other; Agriculture; Land Use, Land-Use Change and Forestry (LULUCF); and Waste.~~ Bottom-up methods can provide precise and accurate country-level emission estimates when the activity data and emission factors are well quantified and understood (Petrescu et al., 2021), such as for the fossil fuel combustion category of the energy sector in many countries. However, these estimates can ~~also~~ have considerable uncertainty when the emission processes are challenging to quantify (such as for ~~AFOLU~~ agriculture, LULUCF, and waste) or if the activity data are inaccurate or missing. For example, Grassi et al. (2022) and McGlynn et al. (2022) estimate the uncertainty on the net LULUCF CO<sub>2</sub> flux to be roughly 35% for Annex I countries and 50% for non-Annex I countries. In addition, these estimates do not capture carbon emissions and removals from unmanaged systems, which are not directly considered in the Paris Agreement, but ~~nevertheless~~ impact the global carbon budget and growth rate of atmospheric CO<sub>2</sub>.

As a complement to these accounting-based inventory efforts, an independent “top-down” assessment of net surface-atmosphere CO<sub>2</sub> fluxes may be obtained from ground-based, airborne and space-based observations of atmospheric CO<sub>2</sub> mole fractions. These top-down methods have undergone rapid improvements in recent years, as recognized in the 2019 Refinement to the 2006 IPCC Guidelines for National ~~Greenhouse Gas~~ GHG Inventories (IPCC, 2019). And, although these methods were not deemed to be a standard tool for verification of conventional inventories, a number of countries (UK, Switzerland, USA, and New Zealand) have adopted atmospheric inverse modeling as a verification system in national inventory reports. Initially, these countries have focused on non-CO<sub>2</sub> gasses (e.g., EPA, 2022), but top-down assessments of the CO<sub>2</sub> budget are now underdevelopment in New Zealand (<https://niwa.co.nz/climate/research-projects/carbon-watch-nz>). Furthermore, significant investments towards building anthropogenic CO<sub>2</sub>-emissions monitoring and verification support capacity are ongoing within the European Commission’s Copernicus Program (see Sect. 9.2.1).

50 In top-down CO<sub>2</sub> flux estimation, the net surface–atmosphere CO<sub>2</sub> fluxes are inferred from atmospheric CO<sub>2</sub> observations using state-of-the-art atmospheric CO<sub>2</sub> inversion systems (e.g., Peiro et al., 2022). This approach provides spatially- and temporally-resolved estimates of surface–atmosphere fluxes for land and ocean regions from which country-level annual land–atmosphere CO<sub>2</sub> fluxes can be estimated. The impact of fossil fuel (and usually fire CO<sub>2</sub> emissions) on the observations are accounted for in the inversions by prescribing maps of those emissions and assuming that they are perfectly known. Thus, fossil fuel and fire CO<sub>2</sub> emissions are not diagnosed yet by these inversions, but net surface–atmosphere CO<sub>2</sub> fluxes from the terrestrial biosphere and oceans are. Terrestrial carbon stock changes can then be calculated by combining net surface–atmosphere CO<sub>2</sub> fluxes with estimates of fossil fuel emissions and horizontal (“lateral”) fluxes occurring within the terrestrial biosphere or between the land and ocean (Kondo et al., 2020). One example of a lateral flux is harvested agricultural products, where carbon is sequestered from the atmosphere by photosynthesis in one region but then this carbon is harvested and exported to another region as agricultural products. Similarly, carbon sequestered by photosynthesis in a forest can be leached away by streams and rivers, and then exported to the ocean. These lateral carbon fluxes are not directly identifiable in atmospheric CO<sub>2</sub> measurements, but accounting for their impact is required in order to convert net land fluxes into stock changes. These estimated terrestrial carbon stock changes reflect the combined impact of direct anthropogenic activities and changes to both managed and unmanaged ecosystems in response to rising CO<sub>2</sub>, climate change, and disturbance events (such as fires).

65 The top-down budgets presented here extend several previous studies that have developed approaches to compare inversion results to [United Nation Framework Convention of Climate Change \(UNFCCC\) inventories](#) [NGHGs](#). Ciais et al. (2021) proposed a protocol for reporting bottom-up and top-down fluxes so that they can be compared consistently. [Petrescu et al. \(2021\) compared top-down fluxes with inventory estimates for the European Union and United Kingdom, including for an ensemble of regional inversions over Europe \(Monteil et al., 2020\)](#). Chevallier (2021) noted that inversion results for terrestrial CO<sub>2</sub> fluxes should be restricted to managed lands and applied a managed land mask to the gridded fluxes of the [CAMS Copernicus Atmosphere Monitoring Service \(CAMS\)](#) CO<sub>2</sub> inversions for the comparison to UNFCCC values in ten large countries or groups of countries. Deng et al. (2022) compared CO<sub>2</sub>, CH<sub>4</sub> and N<sub>2</sub>O fluxes from inversion ensembles available from the Global Carbon Project. For CO<sub>2</sub>, they used six CO<sub>2</sub> flux estimates from inverse models that assimilated measurements from the global air-sample network, filtered their results over managed lands and corrected them for CO<sub>2</sub> fluxes induced by lateral processes to compare with carbon stock changes reported to the UNFCCC by a set of 12 countries. We expand upon these previous studies by providing top-down CO<sub>2</sub> budgets from the v10 Orbiting Carbon Observatory Model Intercomparison Project (v10 OCO-2 MIP), wherein an ensemble of inverse modeling groups conducted standardized experiments assimilating OCO-2 column-averaged dry-air mole fraction ( $\bar{X}_{\text{CO}_2}$ ) retrievals (retrieved with version 10 of the Atmospheric CO<sub>2</sub> Observations from Space (ACOS) full-physics retrieval algorithm), in situ CO<sub>2</sub> measurements, or combinations of these data. This allows us to quantify the sensitivity of top-down carbon budget estimates to the inversion modeling system and the atmospheric CO<sub>2</sub> dataset used to constrain flux estimates.

This paper is outlined as follows. The remainder of Sect. 1 describes the objectives of this work (Sect. 1.1) and provides background information on both the global carbon cycle (Sect. 1.2) and top-down atmospheric CO<sub>2</sub> inversions (Sect. 1.3). Section 2 defines the carbon cycle fluxes of interest. Section 3 describes the flux datasets and their uncertainties, including:

85 fossil fuel emissions, the v10 OCO-2 MIP, riverine fluxes, wood fluxes, crop fluxes, and the net terrestrial carbon stock loss. Section 4 provides an evaluation of the v10 OCO-2 MIP flux estimates. Section 5 presents two metrics for interpreting the top-down constraints on the CO<sub>2</sub> budget. Section 6 gives a description of the dataset, Sect. 7 shows the characteristics of the dataset, and Sect. 9 discusses current limitations and future directions. Finally, Sect. 10 gives the conclusions of this study.

## 1.1 Objectives

90 This is a pilot project designed to start a dialogue between the top-down research community, inventory compilers, and the GHG assessment community to identify ways that top-down CO<sub>2</sub> flux estimates can help inform country-level carbon budgets (see Worden et al. (2022) for a similar pilot methane dataset). To meet this objective, the primary goal of this work is to provide two products: (1) annual net surface–atmosphere CO<sub>2</sub> fluxes and (2) annual changes in terrestrial carbon stocks. These products are provided annually over the six-year period 2015–2020 on both a 1° × 1° global grid and as country-level totals with error  
95 characterization.

These products are intended to be used to help inform inventory development and identify areas for future research in both top-down and bottom-up approaches. ~~Including, including~~, informing strategies for operational top-down carbon cycle products that can be used for tracking combined changes in managed and unmanaged carbon stocks and help quantify the impact of emission reduction activities.

## 100 1.2 Overview of the carbon cycle

~~The carbon cycle describes the movement of carbon between various reservoirs in the Earth system. Carbon cycles between the atmosphere, oceans, and terrestrial biosphere through a number of pathways, while the~~

The burning of fossil fuels and cement production release geologic carbon to the atmosphere ( $40.0 \pm 3.3 \text{ PgCO}_2 \text{ yr}^{-1}$  or  $10.9 \pm 0.9 \text{ PgC yr}^{-1}$  over 2010–2019; Canadell et al., 2021). ~~On an annual net basis~~ These emissions, along with land use activities, impact carbon cycling between atmospheric, oceanic, and biospheric reservoirs that make up a near-closed system on annual timescales. As a result, roughly half of the emitted CO<sub>2</sub> from anthropogenic sources is absorbed by terrestrial ecosystems and oceans (Friedlingstein et al., 2022), reducing the rate of atmospheric CO<sub>2</sub> increase ( $18.7 \pm 0.08 \text{ PgCO}_2 \text{ yr}^{-1}$  or  $5.1 \pm 0.02 \text{ PgC yr}^{-1}$  over 2010–2019; Canadell et al., 2021). Here we briefly review the movement of carbon between the reservoirs, and how these processes are modulated by human activities.

110 Fluxes of carbon between the atmosphere and ocean are driven by the difference in partial pressures of CO<sub>2</sub> between seawater and air, resulting in roughly balancing fluxes from the ocean-to-atmosphere and atmosphere-to-ocean of  $\sim 293 \text{ PgCO}_2 \text{ yr}^{-1}$  ( $\sim 80 \text{ PgC yr}^{-1}$ ) each way (Ciais et al., 2013), with a residual net atmosphere-to-ocean flux due to increasing atmospheric CO<sub>2</sub> ( $9.2 \pm 2.2 \text{ PgCO}_2 \text{ yr}^{-1}$  or  $2.5 \pm 0.6 \text{ PgC yr}^{-1}$  over 2010–2019; Canadell et al., 2021). Regional variations in the solubility and saturation of CO<sub>2</sub> in ocean waters drive net fluxes, with net fluxes to the atmosphere in upwelling regions, such as the eastern  
115 boundary of basins and in equatorial zones (McKinley et al., 2017). Meanwhile, there is net removals by the ocean in western boundary currents and at extratropical latitudes (McKinley et al., 2017). Within the oceans, circulation patterns, mixing, and biologic activity act to redistribute carbon.



On land, terrestrial ecosystems remove atmospheric carbon through photosynthesis, referred to as Gross Primary Production (GPP) (Fig. 1). GPP draws roughly  $440 \text{ PgCO}_2 \text{ yr}^{-1}$  ( $120 \text{ PgC yr}^{-1}$ ) from the atmosphere (Anav et al., 2015). Roughly half of this carbon is emitted back to the atmosphere by plants through autotrophic respiration, while the remaining carbon is used to generate plant biomass and is referred to as Net Primary Production (NPP). On an annual basis, the carbon sequestered through NPP is roughly balanced by carbon loss through a number of processes. The largest of these processes is heterotrophic respiration, which is the respiratory emission of  $\text{CO}_2$  (from the dead organic matter and soil carbon pools) by heterotrophic organisms, and accounts for 82–95% of NPP (Randerson et al., 2002). The combination of heterotrophic and autotrophic respiration is called ecosystem respiration ( $R_{\text{eco}}$ ). The remaining processes have smaller magnitudes, but are still critical for determining the carbon balance of ecosystems. Biomass burning, the emission of carbon to the atmosphere through combustion, releases roughly  $7.3 \text{ PgCO}_2 \text{ yr}^{-1}$  ( $2 \text{ PgC yr}^{-1}$ ) to the atmosphere on an annual basis, but with considerable interannual variability (van der Werf et al., 2017). Carbon can also be emitted from the terrestrial biosphere to the atmosphere in the form of carbon monoxide ( $\text{CO}$ ), methane ( $\text{CH}_4$ ) and other biogenic volatile organic compounds (BVOCs), which are oxidized to  $\text{CO}_2$  in the atmosphere. Rivers move carbon in the form of dissolved inorganic carbon (DIC), dissolved organic carbon (DOC), and particulate organic carbon (POC). This carbon of terrestrial origin is partly transported to the open ocean, partly released to the atmosphere from inland waters and estuaries, and partly buried in aquatic or marine sediments. Finally, anthropogenic activities such as harvesting of crop and wood products result in lateral transport of carbon, such that the removal of atmospheric  $\text{CO}_2$  through NPP and emission of atmospheric  $\text{CO}_2$  through respiration (e.g., decomposition in a landfill) or combustion (e.g., burning of biofuels) occurs in different regions. See Fig. 1 for an illustration of these fluxes.

Globally, there is a long-term net uptake of atmospheric  $\text{CO}_2$  by the land (approximately  $-6.6 \text{ PgCO}_2 \text{ yr}^{-1}$  or  $-1.8 \text{ PgC}_2 \text{ yr}^{-1}$  over 2010–2019; Canadell et al., 2021), which is the residual of an emission due to net land use change ( $5.9 \pm 2.6 \text{ PgCO}_2 \text{ yr}^{-1}$  or  $1.6 \pm 0.7 \text{ PgC yr}^{-1}$  over 2010–2019; Canadell et al., 2021) and removal by other terrestrial ecosystems ( $12.6 \pm 3.3 \text{ PgCO}_2 \text{ yr}^{-1}$  or  $3.4 \pm 0.9 \text{ PgC yr}^{-1}$  over 2010–2019; Canadell et al., 2021). This removal is partially driven by direct feedbacks between increasing  $\text{CO}_2$  and the biosphere, such as  $\text{CO}_2$  fertilization of photosynthesis and increased water use efficiency. Carbon-climate feedbacks also lead to both increases and decreases in terrestrial carbon stocks: for example, warming at high latitudes leads to a more productive biosphere but it also leads to increased plant and soil respiration (Kaushik et al., 2020; Walker et al., 2021; Canadell et al., 2021; Crisp et al., 2022). In addition, the release of nitrogen through anthropogenic energy and fertilizer use may also drive increased carbon sequestration by the terrestrial biosphere (Schulte-Uebbing et al., 2022; Liu et al., 2022; Lu et al., 2021). Regrowth of forests in previously cleared areas, especially in the extratropics, is also thought to be an important uptake term (Kondo et al., 2018; Cook-Patton et al., 2020). Currently, the relative impact of each of these contributions to long-term terrestrial carbon sequestration is poorly known, and likely varies between biomes and climates.

While the existence of a long-term global land sink is supported through a number of lines of evidence (Ballantyne et al., 2012; Keeling and Graven, 2021), regional-scale emissions and removals are less well quantified. Regional-scale carbon sequestration can differ substantially from the global mean and can be impacted by the regional climate, disturbance events (Frank et al., 2015; Wang et al., 2021), and anthropogenic activities (Caspersen et al., 2000; Harris et al., 2012). The need to

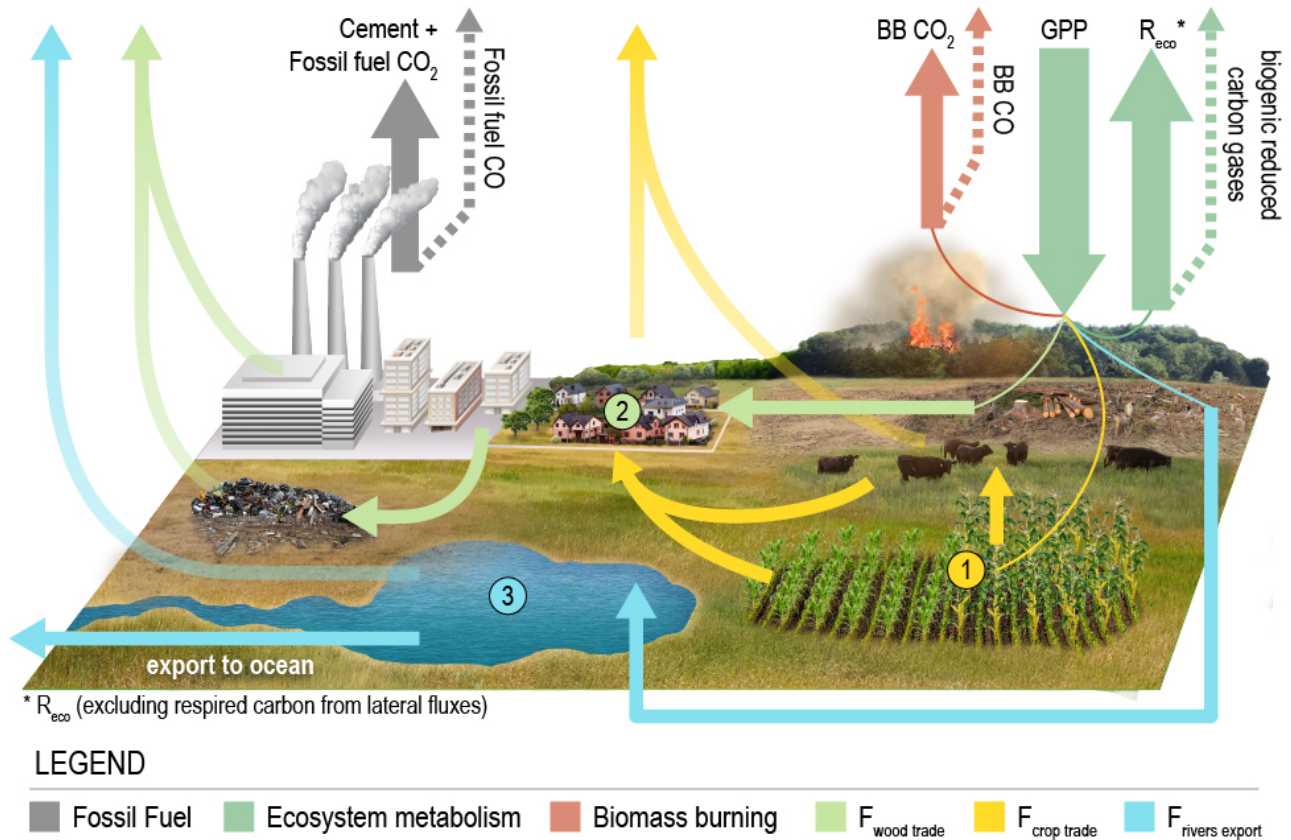

**Figure 1.** CO<sub>2</sub> is removed from the atmosphere through photosynthesis (GPP) and then emitted back to the atmosphere through a number of processes. Three processes move carbon laterally on Earth’s surface, such that emissions of CO<sub>2</sub> occur in a different region than removals: (1) Agriculture; harvested crops are transported to urban areas and to livestock, which are themselves exported to urban areas. CO<sub>2</sub> is respired to the atmosphere in livestock or urban areas. (2) Forestry; logged carbon is transported to urban and industrial areas, then emitted to through decomposition in a landfill or combustion as a biofuel. (3) Water cycle; carbon is leached from soils into water bodies, such as lakes. The carbon is then either deposited, released to the atmosphere, or transported to the ocean (Regnier et al., 2022). Arrows show carbon fluxes and colors indicate whether the flux is associated with (grey) fossil fuel emissions, (dark green) ecosystem metabolism, (red) biomass burning, (light green) forestry, (yellow) agriculture, or (blue) the water cycle. Semi-transparent arrows show fluxes that move between the surface and atmosphere, while solid arrows show fluxes that move between land regions. Dashed arrows show surface–atmosphere fluxes of reduced carbon species that are oxidized to CO<sub>2</sub> in the atmosphere. For simplicity, a cement carbonation sink, volcano emissions, and a weathering sink are not included in this figure.

better quantify regional-scale emissions and removals of carbon has motivated much of the recent expansion of in situ CO<sub>2</sub> observing networks, the launch of space-based CO<sub>2</sub> observing systems, and the development of CO<sub>2</sub> inversion systems.

### 1.3 Background on atmospheric CO<sub>2</sub> inversions

155 Atmospheric CO<sub>2</sub> inversions estimate the underlying net surface–atmosphere CO<sub>2</sub> fluxes from atmospheric CO<sub>2</sub> observations, and this is what is meant by the “top-down” approach (Bolin and Keeling, 1963; Tans et al., 1990; Enting et al., 1995; Gurney et al., 2002; Peiro et al., 2022). In this approach, an atmospheric chemical transport model (CTM) is employed to relate surface–atmosphere CO<sub>2</sub> fluxes to observed atmospheric CO<sub>2</sub> mole fractions. As an inverse problem, the upwind CO<sub>2</sub> fluxes are estimated from the downwind observed CO<sub>2</sub> mole fractions. The surface CO<sub>2</sub> fluxes are adjusted so that forward-simulated  
160 CO<sub>2</sub> mole fractions better match the CO<sub>2</sub> measurements while considering the uncertainty statistics on the observations, transport, and prior surface fluxes.

The atmospheric CO<sub>2</sub> inversion problem is generally ill-posed, such that the solution is underdetermined by the observational constraints. In this case, additional information is required to produce a unique solution and prevent overfitting of the data (Lawson and Hanson, 1974; Tarantola, 2005). Typically, this is performed using Bayesian inference, where prior mean fluxes and their uncertainties provide additional information required to estimate fluxes (Rayner et al., 2019). Prior mean fluxes of net  
165 ecosystem exchange are usually obtained from ~~dynamic global vegetation models~~ terrestrial biosphere models (such as CASA, ORCHIDEE, and CARDAMOM), while prior mean air-sea fluxes are derived from surface water partial pressure of CO<sub>2</sub> (pCO<sub>2</sub>) datasets or from ocean models (e.g., Peiro et al., 2022). The resulting posterior flux estimates combine the constraints on surface fluxes from atmospheric CO<sub>2</sub> data with the prior knowledge of the fluxes. If there is a high density of assimilated  
170 CO<sub>2</sub> observations, then the posterior fluxes will be more strongly impacted by the assimilated data, whereas, in regions with sparse observational coverage, the posterior fluxes will generally remain similar to the prior fluxes (assuming similar prior flux uncertainties across regions).

Measurements of atmospheric CO<sub>2</sub> best inform diffuse biosphere–atmosphere fluxes on large spatial scales. This is because CO<sub>2</sub> has a long atmospheric lifetime, such that the perturbation to atmospheric CO<sub>2</sub> due to emissions and removals from  
175 individual processes and locations gets mixed in the atmosphere (Gloor et al., 2001; Liu et al., 2015). For example, the measurements of CO<sub>2</sub> at Mauna Loa, Hawaii, provide a good estimate of the global-scale changes of CO<sub>2</sub> surface fluxes. Inferring smaller-scale flux signals requires a high density of CO<sub>2</sub> observations (to capture gradients in atmospheric CO<sub>2</sub>) and accurate modeling of atmospheric transport (to relate the measurements with surface fluxes). The accuracy of flux estimates depend on a number of factors, particularly the accuracy and precision of the data, transport model, and prior constraints. Stringent require-  
180 ments on the accuracy of space-based column-averaged dry-air mole fraction ( $X_{\text{CO}_2}$ ) retrievals are required to infer surface fluxes (Chevallier et al., 2005a; Miller et al., 2007). Biases in  $X_{\text{CO}_2}$  retrievals from the Orbiting Carbon Observatory (OCO-2) related to spectroscopic errors, solar zenith angle, surface properties, and atmospheric scattering by clouds and aerosols have been identified (Wunch et al., 2017b). However, intensive research has reduced retrieval errors over time (O’Dell et al., 2018; Kiel et al., 2019). As will be shown in Sect. 4.1, biases in OCO-2  $X_{\text{CO}_2}$  retrievals over land are thought to be relatively  
185 small, although regionally structured biases may be present. However, OCO-2  $X_{\text{CO}_2}$  retrievals over oceans may contain more large-scale spatially coherent retrieval errors that can adversely impact flux estimates.

Accurate atmospheric transport is critical for correctly relating surface–atmosphere fluxes to observations. Due to computational constraints, CTMs are typically run offline with coarsened meteorological fields relative to the parent Numerical Weather Prediction model, which has been shown to introduce systematic transport errors in some configurations (Yu et al., 2018; Stanevich et al., 2020). In addition, these offline CTMs have been shown to have large-scale systematic differences in transport associated with the implementation of transport algorithms (Schuh et al., 2019, 2022). These errors appear to be of the same order as the retrieval biases, although the patterns in time and space are different. Systematic errors related to model transport (and errors in prior information) can partially be accounted for by performing multiple inversions that differ in CTM and prior constraints employed. This motivates inversion model intercomparison projects (MIPs), such as the OCO-2 MIP project (see Sect. 3.2; Crowell et al., 2019; Peiro et al., 2022). From these ensembles of inversions, estimates of both systematic errors (accuracy) and random errors (precision) can be obtained from the model spread.

## 2 Definitions

In this work, we focus on the carbon budget of Earth’s land area, including aquatic systems such as rivers and lakes. In particular, we consider fluxes of carbon between the land and the atmosphere, and lateral carbon transport processes on land and between the land and ocean (Fig. 1). We define the following annual net carbon fluxes (see Fig. 2 for an schematic representation of these fluxes):

- **Fossil fuel and cement emissions (FF)**: The burning of fossil fuels and release of carbon due to cement production, representing a flux of carbon from the land surface (geologic reservoir) to the atmosphere.
- **Net Biosphere exchange (NBE)**: Net flux of carbon from the terrestrial biosphere to the atmosphere due to biomass burning (BB) and ~~ecosystem respiration~~ ( $R_{\text{eco}}$ ) minus Gross Primary Production (GPP) (i.e.,  $\text{NBE} = \text{BB} + R_{\text{eco}} - \text{GPP}$ ). It includes both anthropogenic processes (e.g., deforestation, reforestation, farming) and natural processes (e.g., climate-variability-induced carbon fluxes, disturbances, recovery from disturbances).
- **Terrestrial Net Carbon Exchange (NCE)**: Net flux of carbon from the surface to the atmosphere. For land, NCE can be defined as:

$$\text{NCE} = \text{NBE} + \text{FF} \tag{1}$$

- **Lateral crop flux ( $F_{\text{crop trade}}$ )**: The lateral flux of carbon in (positive) or out (negative) of a region due to agriculture.
- **Lateral wood flux ( $F_{\text{wood trade}}$ )**: The lateral flux of carbon in (positive) or out (negative) of a region due to wood product harvesting and usage.
- **Lateral river flux ( $F_{\text{rivers export}}$ )**: The lateral flux of carbon in (positive) or out (negative) of a region transported by the water cycle.

- **Net terrestrial carbon stock loss** ( $\Delta C_{\text{loss}}$ ): Positive values indicate a loss (decrease) of terrestrial carbon stocks (organic matter stored on land), including above- and below-ground biomass in ecosystems and biomass contained in anthropogenic products (lumber, cattle, etc). This is calculated as:

$$\Delta C_{\text{loss}} = \text{NBE} - F_{\text{crop trade}} - F_{\text{wood trade}} - F_{\text{rivers export}} \quad (2)$$

- 220 – **Net terrestrial carbon stock gain** ( $\Delta C_{\text{gain}}$ ): Positive values indicate a gain (increase) of terrestrial carbon stocks, and is the negative of  $\Delta C_{\text{loss}}$ :

$$\Delta C_{\text{gain}} = -\Delta C_{\text{loss}} \quad (3)$$

## 2.1 Country and regional aggregation

To aggregate gridded  $1^\circ \times 1^\circ$  flux estimates to country totals we use a country mask (Center for International Earth Science  
225 Information Network - CIESIN - Columbia University, 2018). We also provide NCE and  $\Delta C_{\text{loss}}$  estimates for several country groupings. A number of regional intergovernmental organizations are included: the Association of Southeast Asian Nations (ASEAN), the African Union (AU) and each of its sub-regions (North, South, West, East, and Central), the Community of Latin American and Caribbean States plus Brazil (CELAC+Brazil), the Economic Cooperation Organization (ECO), the European Union (EU [or EU27](#)), and the South Asian Association for Regional Cooperation (SAARC). We also include some geographic  
230 regions, specifically North America, the Middle East and Europe. Countries included in these groupings are listed in the supplementary materials (Text S1).

## 3 Flux datasets

Here, we describe the methodologies and datasets for estimating FF (Sect. 3.1), NCE (Sect. 3.2), ~~country-level  $F_{\text{rivers export}}$  (Sect. 3.3.1), country-level  $F_{\text{crop trade}}$  and country-level  $F_{\text{wood trade}}$  and lateral carbon fluxes (Sect. 3.3.2). Gridded lateral~~  
235 ~~fluxes are estimated using a somewhat different approach, and are described in Sect. 3.3.3. Finally, we describe [3.3](#), and~~ how these data are used to estimate  $\Delta C_{\text{loss}}$  (Sect. 3.4).

### 3.1 Fossil fuel and cement emissions

Gridded  $1^\circ \times 1^\circ$  fossil CO<sub>2</sub> emissions, including [those](#) from cement production, are calculated as follows. Monthly gridded emissions up to 2019 are taken from the 2020 version of the Open-source Data Inventory for Anthropogenic CO<sub>2</sub> (ODIAC2020,  
240 2000–2019) emission data product (Oda and Maksyutov, 2011; Oda et al., 2018). The 2020 emissions were not part of ODIAC, but were projected using the Carbon Monitor (CM) emission data product (<https://carbonmonitor.org/>, downloaded 19th May 2021). For each month in 2020 and later, the ratio between that month’s emissions and the emissions from the same month in 2019 was calculated from the CM emission data. Since CM provides daily emissions per sector for a handful of major emitting

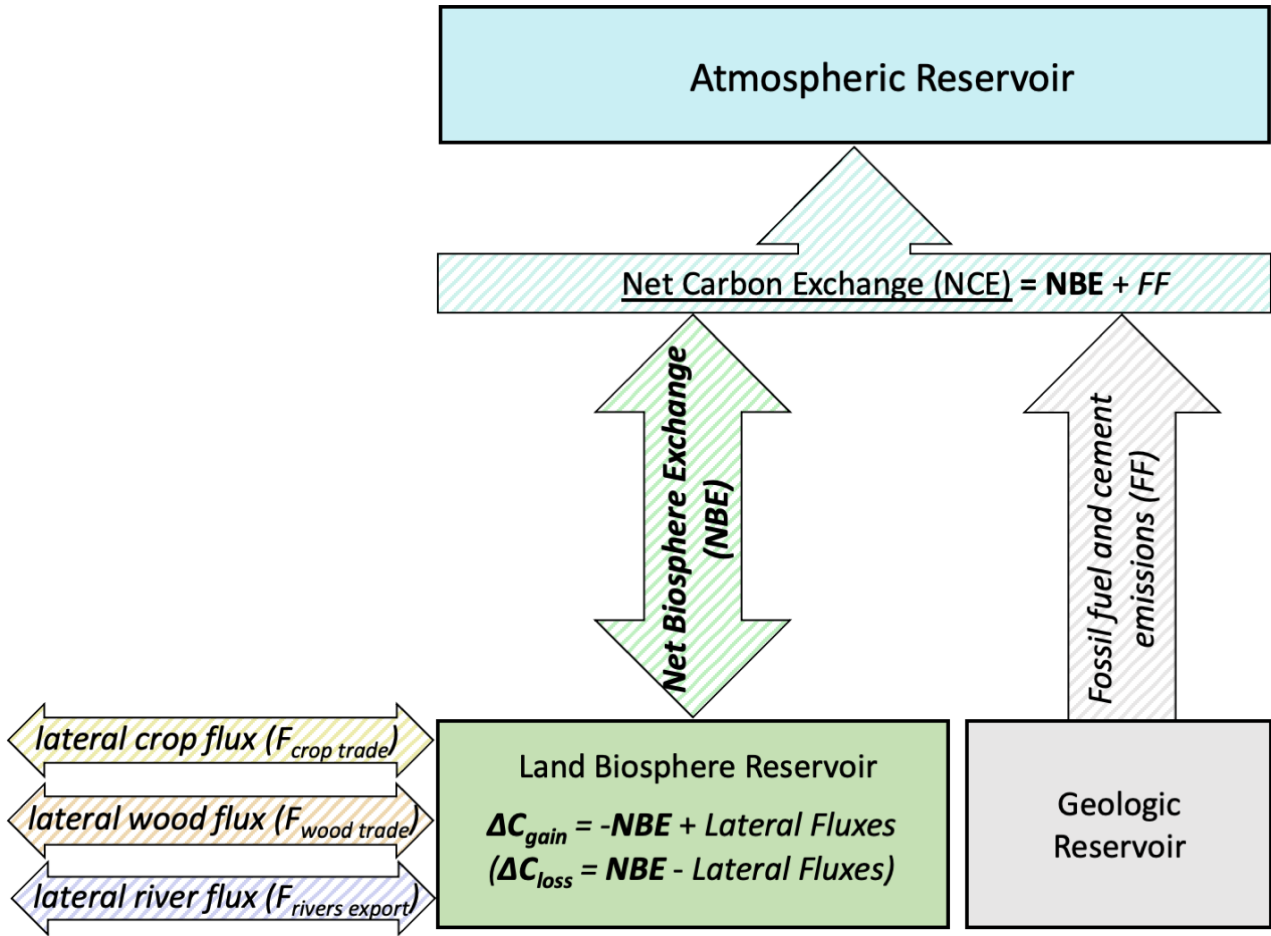

**Figure 2.** Carbon fluxes for a given land region, such as a country. Boxes with solid backgrounds show reservoirs of carbon. Arrows with hatched shading show fluxes between reservoirs. NCE is underlined to emphasize that this quantity is estimated from the atmospheric CO<sub>2</sub> measurements using top-down methods. Italicized quantities are obtained from bottom-up datasets ( $FF$ ,  $F_{crop\ trade}$ ,  $F_{wood\ trade}$ ,  $F_{rivers\ export}$ ). Bold quantities are derived in this study from the top-down and bottom-up datasets ( $NBE$ ,  $\Delta C_{gain}$ ,  $\Delta C_{loss}$ ).

countries and the globe, CM emissions are summed over sectors and days in each month to create monthly total emissions per  
 245 named country and the rest of the world (RoW). The ratio of each (post-2019) month's emission to the same month in 2019 is  
 then calculated per named country and RoW, then distributed over a  $1^\circ \times 1^\circ$  grid assuming homogeneity of the ratio over each  
 named country and RoW. 2019 ODIAE emissions for that month are then multiplied by the ratio to generate  $1^\circ \times 1^\circ$  monthly  
 emissions after 2019. While this method loses the information of day-to-day variability provided by CM, this is a conscious  
 choice to be consistent over the entire inversion period. Finally, we impose day-of-week and hour-of-day variations on these  
 250 fluxes following the Temporal Improvements for Modeling Emissions by Scaling (TIMES) diurnal and day-of-week scaling  
 (Nassar et al., 2013). The  $1^\circ \times 1^\circ$  uncertainty map is based on the combination of the global level FF uncertainty (one-sigma

of 4.2%, Andres et al., 2014) and the grid level emission differences due to the different disaggregation methods (Oda et al., 2015). Note that these FF uncertainties are not considered in the inversions used for this product development.

Country-level fossil fuel emission estimates are obtained by aggregating the  $1^\circ \times 1^\circ$  estimates using the country mask.  
255 Uncertainties on country-level estimates are calculated using the fractional uncertainties of Andres et al. (2014).

### 3.2 Net Carbon Exchange (NCE) and Net Biosphere Exchange (NBE)

We employ results from the v10 OCO-2 MIP, which is an international collaboration of atmospheric CO<sub>2</sub> inversion modelers that produces ensembles of CO<sub>2</sub> surface–atmosphere flux estimates by assimilating space-based OCO-2 retrievals of  $X_{\text{CO}_2}$  and in situ CO<sub>2</sub> measurements. The v10 OCO-2 MIP is updated from the v9 OCO-2 MIP described in Peiro et al. (2022). Updates  
260 to the v10 OCO-2 MIP are presented here with additional details available at [https://gml.noaa.gov/ccgg/OCO2\\_v10mip/](https://gml.noaa.gov/ccgg/OCO2_v10mip/).

The v10 OCO-2 MIP consists of a number of inversion systems that perform a set of experiments following a standard protocol. Here, we include fluxes from 11 of the 14 MIP models (Table 1; CMS-Flux and JHU were excluded due to time constraints and LoFI was excluded because it employs a non-traditional inversion approach that does not follow the MIP protocol). There are five v10 OCO-2 MIP experiments that each ensemble member performs, which differ by the data that is  
265 assimilated (CO<sub>2</sub> datasets described in Sect. 3.2.1):

- **IS**: assimilates in situ CO<sub>2</sub> mole fraction measurements from an international observational network,
- **LNLG**: ACOS v10 land nadir and land glint total column dry-air mole fractions ( $X_{\text{CO}_2}$ ) from OCO-2,
- **LNLGIS**: assimilates both in situ and ACOS v10 OCO-2 land nadir and glint  $X_{\text{CO}_2}$  retrievals together,
- **OG**: assimilates ACOS v10 OCO-2 ocean glint  $X_{\text{CO}_2}$  retrievals
- 270 – **LNLGOGIS**: assimilates all the above datasets together.

For each experiment, each inversion group imposes a common fossil fuel emission dataset identical to the one described in Sect. 3.1. All other prior flux estimates were chosen independently by each modeling group and are listed in Table 1. The inversions assimilate the standardized v10 OCO-2 and in situ data from 6 September 2014 through 31 March 2021 (see  
275 Sect 3.2.1), with the length of spin-up period and in situ data assimilated during that period being left up to the discretion of each group in the MIP. Each modeling group submitted net air–sea fluxes and NBE across 2015–2020, interpolated from the native resolution to a  $1^\circ \times 1^\circ$  spatial grid at monthly resolution, which are publicly available for download from [https://gml.noaa.gov/ccgg/OCO2\\_v10mip/](https://gml.noaa.gov/ccgg/OCO2_v10mip/).

The performance of each atmospheric CO<sub>2</sub> inversion was evaluated through comparisons of the posterior CO<sub>2</sub> mole-fraction field (i.e., CO<sub>2</sub> fields simulated forward with the posterior fluxes) against independent in situ CO<sub>2</sub> measurements and OCO-2  
280  $X_{\text{CO}_2}$  retrievals that were withheld from the assimilation for validation, as well as  $X_{\text{CO}_2}$  retrievals from the Total Column Carbon Observing Network (TCCON; Wunch et al., 2011). The evaluation of the experiments is presented in Sect. 4, with additional analysis available from the v10 OCO-2 MIP website.

**Table 1.** Inversions specifications for each v10 OCO-2 MIP ensemble member.

| Simulation name<br>(reference)                                       | Transport<br>model   | Driving<br>meteorology | Meteorology<br>resolution<br>(degrees)                             | Prior NEE                    | Prior air-sea        | Prior fire              | Inverse<br>Method         |
|----------------------------------------------------------------------|----------------------|------------------------|--------------------------------------------------------------------|------------------------------|----------------------|-------------------------|---------------------------|
| AMES<br>(Philip et al., 2019, 2022)                                  | GEOS-Chem            | MERRA-2                | $4^\circ \times 5^\circ$                                           | CASA-GFED4.1s                | CT2019OI             | GFEDv4.1s               | 4D-Var                    |
| Baker<br>(Baker et al., 2006b, 2010)                                 | PCTM                 | MERRA-2                | $1^\circ \times 1.25^\circ$ prior,<br>$4^\circ \times 5^\circ$ opt | CASA-GFED3                   | Landschützer v4.4    | GFEDv4                  | 4D-Var                    |
| CAMS<br>(Chevallier et al., 2005b)                                   | LM Dz                | ERA5                   | $1.9^\circ \times 3.75^\circ$                                      | ORCHIDEE<br>(climatological) | CMEMS                | GFED4.1s                | Variational               |
| CMS-Flux <sup>a</sup><br>(Liu et al., 2021a)                         | GEOS-Chem            | MERRA-2                | $4^\circ \times 5^\circ$                                           | CARDAMOM                     | MOM-6                | CARDAMOM                | 4D-Var                    |
| COLA<br>(Liu et al., 2021b)                                          | GEOS-Chem            | MERRA-2                | $4^\circ \times 5^\circ$                                           | VEGAS                        | Rödenbeck<br>2021    | VEGAS                   | EnKF                      |
| CSU                                                                  | GEOS-Chem            | MERRA-2                | $4^\circ \times 5^\circ$                                           | SiB-4 w/<br>MERRA-2          | Landschützer<br>v18  | GFED4.1s                | synthesis                 |
| CT<br>(Jacobson et al., 2020)                                        | TM5                  | ERA5                   | $2^\circ \times 3^\circ /$<br>$1^\circ \times 1^\circ$             | CT2019 CASA<br>GFED4.1s      | CT2019OI             | CT2019 CASA<br>GFED4.1s | EnKF                      |
| JHU <sup>a</sup><br>(Miller et al., 2020)<br>(Chen et al., 2021b, a) | GEOS-Chem            | MERRA-2                | $4^\circ \times 5^\circ$                                           | CASA-GFED 4.1s               | Takahashi            | GFED4.1s                | geostatistical/<br>4D-Var |
| LoFI <sup>b</sup><br>(Weir et al., 2021)                             | GEOS GCM             | GEOS CGM               | $0.5^\circ \times 0.625^\circ$                                     | CASA-GFED3                   | LoFI Takahashi       | QFED                    | N/A                       |
| NIES<br>(Maksyutov et al., 2021)                                     | NIES-TM/<br>FLEXPART | ERA-5/<br>JRA-55       | $3.75^\circ \times 3.75^\circ /$<br>$0.1^\circ \times 0.1^\circ$   | Zeng 2020                    | Landschützer<br>2020 | GFAS                    | 4D-Var                    |
| OU                                                                   | TM5                  | ERA-Interim            | $4^\circ \times 6^\circ$                                           | CASA-GFED3                   | Takahashi            | GFEDv3                  | 4D-Var                    |
| TM5-4DVar                                                            | TM5                  | ERA-Interim            | $2^\circ \times 3^\circ$                                           | SiB-CASA                     | CT2019<br>Opt Clim   | GFEDv4                  | 4D-Var                    |
| UT<br>(Deng et al., 2014, 2016)                                      | GEOS-Chem            | GEOS-FP                | $4^\circ \times 5^\circ$                                           | BEPS                         | Takahashi            | GFEDv4                  | 4D-Var                    |
| WOMBAT<br>(Zammit-Mangion et al., 2022)                              | GEOS-Chem            | MERRA-2                | $2^\circ \times 2.5^\circ$                                         | SiB-4 w/<br>MERRA-2          | Landschützer 2020    | GFED4.1s                | Synthesis<br>with MCMC    |

<sup>a</sup>Due to time constraints, this ensemble member is not included in this product; <sup>b</sup>This is not a traditional inversion and is not included in this product.



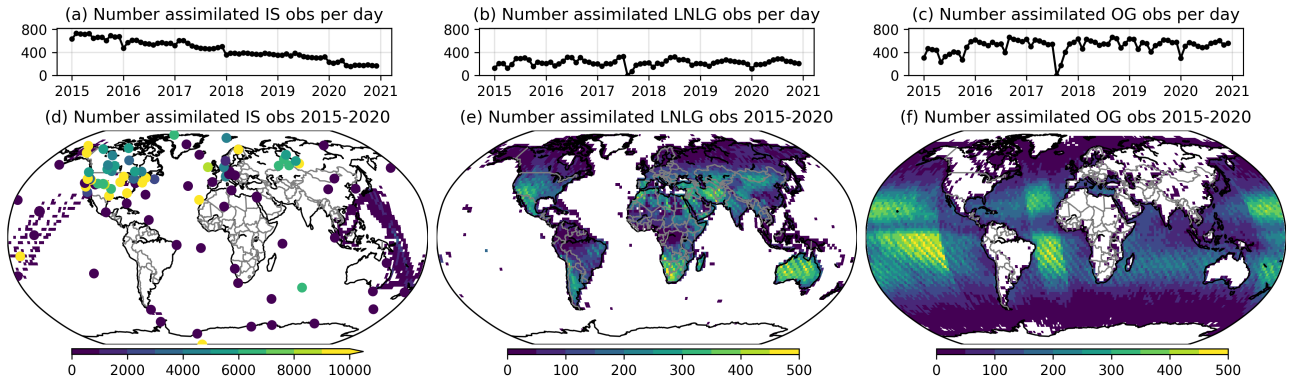

**Figure 3.** Assimilated observations for IS and LNLG v10 MIP experiments. Number of monthly (a) in situ  $\text{CO}_2$  measurements and (b) ACOS v10 OCO-2 land nadir and land glint  $X_{\text{CO}_2}$  retrievals binned into 10 s averages, and (c) ACOS v10 OCO-2 ocean glint  $X_{\text{CO}_2}$  retrievals binned into 10 s averages. Spatial distribution of (d) in situ (e) ACOS v10 OCO-2 land  $X_{\text{CO}_2}$  retrievals, and (f) ACOS v10 OCO-2 ocean  $X_{\text{CO}_2}$  retrievals over 2015–2020. Shipboard and aircraft in situ  $\text{CO}_2$  measurements are aggregated to a  $2^\circ \times 2^\circ$  spatial grid, surface site measurements are shown as scattered points, and ACOS v10 OCO-2  $X_{\text{CO}_2}$  retrievals are shown aggregated to a  $2^\circ \times 2^\circ$  spatial grid.

For this study, the best estimate of NCE is taken to be the ensemble median for each experiment (denoted  $\overline{\text{NCE}}_{\text{experiment}}$ ). The uncertainty in NCE is calculated as an estimate of the standard deviation (denoted  $\sigma_{\text{NCE}}$ ) of the distribution's standard deviation using the interquartile range (IQR) of the flux-inversion-ensemble-v10 OCO-2 MIP ensemble. It is a robust estimate that requires only the middle 50% of the ensemble to be normally distributed (Hoaglin et al., 1985). Hence from the normal tables, to two decimal places:

$$\sigma_{\text{NCE}} = \frac{\text{IQR}(\text{NCE})}{1.35}. \quad (4)$$

For country-level fluxes, the NCE estimates are first aggregated to country totals for each ensemble member before calculating the median and standard deviation. This is done because there are spatial covariances between  $1^\circ \times 1^\circ$  grid cells. Thus, first aggregating regions for each ensemble member accurately propagates the aggregate differences between regions across the ensemble members.

The NBE estimate is calculated by subtracting the ODIAC Fossil Fuel emissions from NCE. The variance in NBE is then taken to be the sum of the variances of NCE and FF:

$$\sigma_{\text{NBE}}^2 = \sigma_{\text{NCE}}^2 + \sigma_{\text{FF}}^2 \quad (5)$$

### 3.2.1 Atmospheric $\text{CO}_2$ data included in v10 OCO-2 MIP

In situ  $\text{CO}_2$  measurements (Fig. 3a,d) are drawn from five data collections made available in Obspack format (Masarie et al., 2014). Those source ObsPacks and their references are listed in Table 2. [These data include measurements from 55 international laboratories at 460 sites around the world.](#) The majority of data are from the openly available GLOBALVIEW+ program, but

300 with some additional provisional data for 2020–21, and data from other programs not participating in the GLOBALVIEW+ project. CO<sub>2</sub> measurements are broadly divided into two categories: those measurements we identify as suitable for assimilation, and other measurements not suitable for assimilation.

In CO<sub>2</sub> inverse analyses, uncertainties ascribed to in situ measurements are a combination of the uncertainty in the measurement and a representativeness error from the forward model inability to accurately simulate the measurement (due to aspects like a coarse model grid). To characterize the representativeness error, we used an empirical scheme based on simulations from the v7 OCO-2 MIP (Crowell et al., 2019). In situ CO<sub>2</sub> measurements are simulated in a forward simulation, and then the model-data mismatch statistics are calculated to characterize the representativeness errors at each measurement location and for each season. Although this was the standard method for characterizing uncertainties for modeled in situ measurements, each v10 OCO-2 MIP group was free to choose how to set the uncertainties in their specific set-ups.

310 Of the in situ measurements designated as being appropriate for assimilation, about 5% were withheld for cross-validation purposes. These data were chosen to be as independent as possible from the measurements that were assimilated. For quasi-continuous measurements, such as those taken every 15 minutes at NOAA tall towers, measurements were withheld for entire days: we chose 5% of the days in the dataset, and we withheld every assimilable measurement on that day. This is also how CO<sub>2</sub> measurements on NIES ships were treated. Entire aircraft profiles in the NOAA light-aircraft profiling network are assumed to consist of vertically correlated measurements, so entire profiles were withheld: we chose 5% of aircraft profiles to withhold. Most flask sites have measurement sampling protocols intended to ensure independence; they are often taken at weekly or biweekly intervals during meteorological conditions meant to allow regional background air masses to be sampled. Thus, we chose to withhold 5% of assimilable flask measurements. We also verified that datasets at the same site were withheld on the same days; aircraft profiles over tower sites were, for instance, withheld on the same days that tower data were withheld.

320 OCO-2 land (Fig. 3b,e) and ocean (Fig. 3c,f) X<sub>CO<sub>2</sub></sub> retrievals are performed using version 10 of NASA’s Atmospheric CO<sub>2</sub> Observations from Space (ACOS) full-physics retrieval algorithm (O’Dell et al., 2018). A common set of OCO-2 retrieval “super-obs” data were derived from these retrievals and were assimilated by each modeling group. These “super-obs” are obtained by aggregating retrievals into 10 s averages (which better match the coarse transport models grid cells used in the inversions) following the same procedure as the v9 OCO-2 MIP (Peiro et al., 2022). Specifically, individual scenes within the 10 s span are weighted according to the inverse of the square of the X<sub>CO<sub>2</sub></sub> uncertainty (standard deviations) produced by the retrieval, and correlations of +0.3 for land scenes and +0.6 for ocean scenes are assumed when calculating the uncertainty on the 10-second averages (see Sect. 3.2.1 of Baker et al., 2022); transport model errors are also considered (based on Schuh et al., 2019). Only 10 s spans with 10 or more good quality retrievals were used (sparser data being thought to be more prone to cloud-related biases). In the same vein as was done for the in situ data, X<sub>CO<sub>2</sub></sub> data from 5% of the orbits (entire orbits were withheld), chosen at random, were withheld for evaluation purposes.

### 3.3 Country-level $F_{\text{rivers export}}$ Lateral carbon fluxes

Lateral carbon flux datasets include country-level  $F_{\text{rivers export}}$  (Sect. 3.3.1), country-level  $F_{\text{crop trade}}$  and country-level  $F_{\text{wood trade}}$  (Sect. 3.3.2). Gridded lateral fluxes are estimated using a somewhat different approach, and are described in Sect. 3.3.3.

**Table 2.** In situ CO<sub>2</sub> measurement collections used in the v10 OCO-2 MIP, with the total number of measurements between 6 September 2014 and 1 January 2021, and the numbers of measurements assimilated and withheld for cross-validation in the same period. More than 95% of the in situ measurements come from the GLOBALVIEW+ and CO<sub>2</sub> NRT ObsPacks, both of which are publicly available at <https://gml.noaa.gov/ccgg/obspack/data.php>.

| ObsPack name                                             | Total No. Measurements | Assimilated      | Withheld      | Reference                                  |
|----------------------------------------------------------|------------------------|------------------|---------------|--------------------------------------------|
| obspack_CO2_1_GLOBALVIEWplus_v6.1_2021-03-01             | 9,611,095              | 766,179          | 38,483        | Schuldt et al. (2021b)                     |
| obspack_CO2_1_NRT_v6.1.1_2021-05-17                      | 755,477                | 62,011           | 2,996         | Schuldt et al. (2021a)                     |
| obspack_CO2_1_NIES_Shipboard_v3.0_2020-11-10             | 418,496                | 216,963          | 12,766        | Tohijima et al. (2005); Nara et al. (2017) |
| obspack_CO2_1_AirCore_v4.0_2020-12-28                    | 55,620                 |                  |               | Baier et al. (2021)                        |
| obspack_multi-species_1_manauis_profiles_v1.0_2021-05-20 | 3,194                  |                  |               | Miller et al. (2021)                       |
| <b>TOTAL</b>                                             | <b>10,843,882</b>      | <b>1,045,153</b> | <b>54,245</b> |                                            |

**Table 3.** Data sources for lateral flux estimates

| <u>Resolution</u>                          | <u>Flux</u>                                  | <u>Model / Data source</u>                                                                | <u>Section</u>     |
|--------------------------------------------|----------------------------------------------|-------------------------------------------------------------------------------------------|--------------------|
| <u>National</u>                            | <u><math>F_{\text{rivers export}}</math></u> | <u>Dynamic Land Ecosystem Model (DLEM)</u><br>and<br><u>Global NEWS with COSCATs data</u> | <u>Sect. 3.3.1</u> |
| <u>National</u>                            | <u><math>F_{\text{wood trade}}</math></u>    | <u>UN FAO</u>                                                                             | <u>Sect. 3.3.2</u> |
| <u>National</u>                            | <u><math>F_{\text{crop trade}}</math></u>    | <u>UN FAO</u>                                                                             | <u>Sect. 3.3.2</u> |
| <u><math>1^\circ \times 1^\circ</math></u> | <u><math>F_{\text{rivers export}}</math></u> | <u>Global NEWS with COSCATs data</u>                                                      | <u>Sect. 3.3.3</u> |
| <u><math>1^\circ \times 1^\circ</math></u> | <u><math>F_{\text{wood trade}}</math></u>    | <u>UN FAO with downscaling</u>                                                            | <u>Sect. 3.3.3</u> |
| <u><math>1^\circ \times 1^\circ</math></u> | <u><math>F_{\text{crop trade}}</math></u>    | <u>UN FAO with downscaling</u>                                                            | <u>Sect. 3.3.3</u> |

### 3.3.1 Country-level $F_{\text{rivers export}}$

335 Rivers transport carbon laterally across land regions (e.g., to a lake) and from the land to the ocean. This lateral transport must be accounted for to quantify the total change in terrestrial carbon in a given region. However, there is considerable uncertainty in lateral carbon flux by rivers. To account for this, we use two independent estimates of country-level totals: one from the Dynamic Land Ecosystem Model (~~DLEM~~)(DLEM; Tian et al., 2010, 2015a), and the other based on Deng et al. (2022) who use the Global NEWS model (Mayorga et al., 2010) and observations across COastal Segmentation and related

340 CATchments (~~COSCATs~~)(Meybeck et al., 2006) that include DIC (~~COSCATs; Meybeck et al., 2006~~ that include dissolved inorganic carbon (DIC) of atmospheric origin), ~~DOC and POC~~, dissolved organic carbon (DOC) and particulate organic carbon (POC). These datasets cover 2015–2019. For 2020, we impose the 2015–2019 mean.

The DLEM is a process-based terrestrial ecosystem model that couples biophysical, soil biogeochemical, plant physiological and riverine processes with vegetation and land-use dynamics to simulate and predict the vertical fluxes, lateral fluxes, and

345 storage of water, carbon, GHGs, and nutrient dynamics in terrestrial ecosystems and their interfaces with the atmosphere and land-ocean continuum (Tian et al., 2010, 2015a). There are three major processes involved in simulating the export of water, carbon, and nutrients from land surface to the coastal ocean: 1) the generation of runoff and leachates, 2) the leaching of water, carbon and nutrients from land to river networks in the form of overland flow and base flow, and 3) transport of riverine materials along river channels from upstream areas to coastal regions. The key processes and parameterization in the DLEM

350 have been described in previous publications regarding the water discharge (Liu et al., 2013; Tao et al., 2014), riverine carbon fluxes (Ren et al., 2015, 2016; Tian et al., 2015b; Yao et al., 2021), and riverine nitrogen fluxes (Yang et al., 2015; Tian et al., 2020) from the terrestrial ecosystem to coastal oceans. The newly improved DLEM aquatic module better addresses processes within global small streams, which were recognized as hotpots of GHG emissions (Yao et al., 2020, 2021). DLEM produces estimates of the land loadings of carbon species (DIC, DOC, and POC), CO<sub>2</sub> degassing and carbon burial during transporting,

355 and the exports of carbon (DIC, DOC, and POC) to the ocean for 105 basin-level segmentations (modified from COSCATs) (Meybeck et al., 2006). To estimate country totals, we map the basin carbon loss across land by assuming that the net carbon flux occurs uniformly across each basin. We then use the country mask to estimate the country totals for each region.

Deng et al. (2022) estimate the lateral carbon export by rivers to the coast minus the imports from rivers entering in each country (for relevant cases), including DOC, POC and DIC of atmospheric origin. Estimates of DOC, POC and DIC are  
360 obtained from the Global NEWS model (Mayorga et al., 2010), with a correction based on Resplandy et al. (2018) so that the global total exported to the coastal ocean is  $2.86 \text{ PgCO}_2 \text{ yr}^{-1}$  ( $0.78 \text{ PgC yr}^{-1}$ ). Deng et al. (2022) perform a correction to the Global NEWS estimates to remove the contribution of lithogenic carbon, using the methodology of Ciais et al. (2021).

For the analysis that follows, we estimate country-level totals of riverine lateral carbon fluxes by combining the estimates of DLEM with those of Deng et al. (2022). We take the mean of the two estimates to be the best estimate and take the magnitude  
365 of the difference between the estimates to be the one-sigma uncertainty. Figure S1 shows the 2015–2019 mean annual net riverine lateral carbon fluxes. Fluxes are uniformly negative, implying a net flux of carbon from the land to the ocean and reduction in stored carbon for all countries. Fluxes are most negative in tropical rainforest and tropical monsoon climates, and they are smallest in more arid regions.

### 3.4 **Country-level $F_{\text{wood trade}}$ and $F_{\text{crop trade}}$**

#### 370 3.3.2 Country-level $F_{\text{wood trade}}$ and $F_{\text{crop trade}}$

Wood and crop products are traded between nations. We estimate the annual lateral fluxes of carbon due to this trade following the approaches of Deng et al. (2022) and Ciais et al. (2021). This approach utilizes crop and wood trade data compiled by the Food and Agriculture Organization of the United Nations (FAO, <http://www.fao.org/faostat/en/#data>). The crop flux was estimated from the annual trade balance of 171 crop commodities calculated for each country. For wood products, we use the  
375 bookkeeping model of Mason Earles et al. (2012) to calculate the fraction of imported carbon in wood products that is oxidized in each of 270 countries during subsequent years. One-sigma uncertainties in country-level fluxes are assumed to be 30% of the mean value. This dataset covers 2015–2019. For 2020, we assume fluxes equal to the 2015–2019 mean. The net crop and wood lateral fluxes and their uncertainties are shown in Fig. S2.

### 3.4 **$1^\circ \times 1^\circ$ lateral flux estimates**

#### 380 3.3.3 $1^\circ \times 1^\circ$ lateral flux estimates

Lateral fluxes at a higher resolution ( $1^\circ \times 1^\circ$ ) follow similar principles to national values but were estimated separately with different implementation choices. High-resolution proxy data (satellite-derived NPP, population or livestock maps, etc.) enabled subnational disaggregation. This was done using national totals based on FAO statistics for  $F_{\text{wood trade}}$  and  $F_{\text{crop trade}}$ . For  $F_{\text{rivers export}}$ , these estimates were generated from Global NEWS and COSCATs data (DLEM was only used for national  
385 totals). For each  $1^\circ \times 1^\circ$  grid cell, we assume the standard deviation of the mean flux to be 30% for  $F_{\text{wood trade}}$  and  $F_{\text{crop trade}}$ .

and 60% for  $F_{\text{rivers export}}$ . These uncertainty estimates are based on expert opinion as a rigorous error budget has not yet been developed for the  $1^\circ \times 1^\circ$  lateral flux estimates.

### 3.4 Estimate of carbon stock loss ( $\Delta C_{\text{loss}}$ )

Finally, we calculate  $\Delta C_{\text{loss}}$  using Eqn. 2 with the datasets described above. Assuming that the components contributing to  $\Delta C_{\text{loss}}$  are independent, we calculate the uncertainty on  $\Delta C_{\text{loss}}$  by combining the uncertainties (one standard deviations) from the component fluxes in quadrature:

$$\sigma_{\Delta C_{\text{loss}}}^2 = \sigma_{\text{NBE}}^2 + \sigma_{F_{\text{crop trade}}}^2 + \sigma_{F_{\text{wood trade}}}^2 + \sigma_{F_{\text{rivers export}}}^2 \quad (6)$$

## 4 Evaluation of v10 OCO-2 MIP experiments

The performance of top-down  $\text{CO}_2$  flux estimates can be impacted by a number of factors, including biases in the assimilated data, model transport, prior constraints, and in the inversion architectures. Therefore, evaluating the performance of v10 OCO-2 MIP fluxes against independent observational datasets is critical for assuring high quality flux estimates. Here, we evaluate the v10 OCO-2 MIP experiments in two ways. First, we compare the posterior  $\text{CO}_2$  fields against independent  $\text{CO}_2$  measurements (Sect. 4.1). Second, we compare the inferred air–sea  $\text{CO}_2$  flux against estimates based on surface ocean  $\text{CO}_2$  partial pressure ( $\text{pCO}_2$ ) measurements (Sect. 4.2).

### 4.1 Evaluation of posterior $\text{CO}_2$ fields

We consider four atmospheric  $\text{CO}_2$  datasets:

1. Withheld in situ  $\text{CO}_2$  measurements. These are measurements contained in the Obspack collection described in Sect. 3.2.1 but intentionally withheld for evaluation purposes. Independence from the assimilated data is ensured following the steps described in Sect. 3.2.1.
2.  $X_{\text{CO}_2}$  retrievals from the TCCON. These data are acquired from a network of ground-based Fourier Transform Spectrometers measuring direct solar spectra from which  $X_{\text{CO}_2}$  is retrieved (Wunch et al., 2011). For this analysis, we include 30 TCCON sites listed in table A1. These data are filtered and aggregated following the method outlined in Appendix C of Crowell et al. (2019).
3. Withheld OCO-2 land glint and land nadir  $X_{\text{CO}_2}$  retrievals. These data could have been assimilated, but they are intentionally withheld for evaluation purposes (Sect. 3.2.1).
4. Withheld OCO-2 ocean glint  $X_{\text{CO}_2}$  retrievals. These data could have been assimilated, but they are intentionally withheld for evaluation purposes (Sect. 3.2.1).

We first perform a simple check on the inversion results by comparing the atmospheric  $\text{CO}_2$  growth rate estimated from the v10 OCO-2 MIP experiments to that derived directly from NOAA  $\text{CO}_2$  measurements (Fig. 4). The growth rate is estimated from

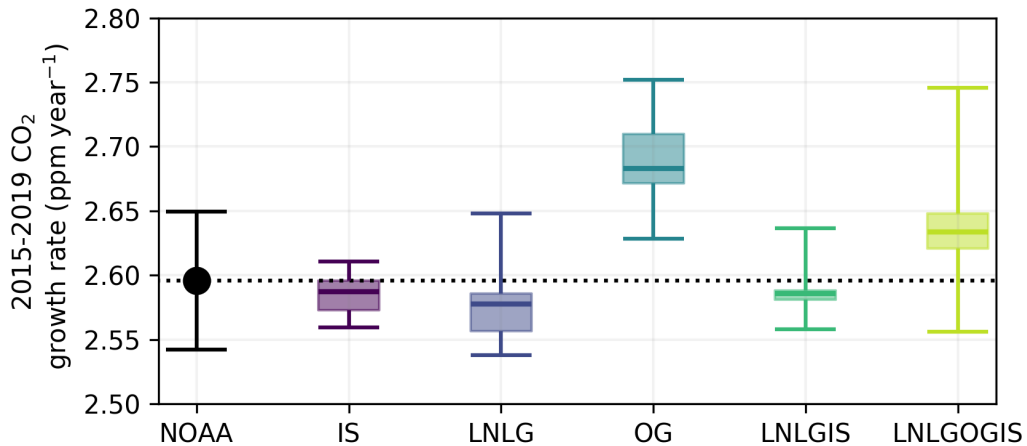

**Figure 4.** Mean 2015–2019 global mean CO<sub>2</sub> growth rate estimated from NOAA site measurements and for the v10 OCO-2 MIP experiments. The estimates of the CO<sub>2</sub> growth rate for each experiment are computed by sampling the model CO<sub>2</sub> fields at the same times and locations as those used to derive the NOAA measurement-based estimate. Each v10 OCO-2 MIP experiment is shown as a box plot, with the error bars showing the full range, the shaded region showing the interquartile range, and the solid line showing the median ensemble member of the ensemble.

415 CO<sub>2</sub> measurements and model co-samples at “marine boundary layer” sites, which predominantly observe well-mixed marine  
 boundary layer air representative of a large volume of the atmosphere. A smooth curve is then fit to these data to estimate  
 the global growth rate (Thoning et al., 1989). This is the same method employed by NOAA to report the CO<sub>2</sub> growth rate  
 (gml.noaa.gov/ccgg/trends/). We estimate the uncertainty in the measurement-based growth rate from the difference between  
 the growth rate estimated here and that reported on the NOAA website. Differences between these estimates are primarily  
 420 driven by differences in measurement sampling used for the website relative to that used here (as we are limited to withheld  
 co-samples here). We calculate the uncertainty as the standard error of the mean for the differences between the growth rates  
 estimated here and by NOAA across 2015–2019. This gives an uncertainty on the 5-year growth rate of  $\pm 0.053$  ppm yr<sup>-1</sup>.  
 Note that NOAA reports the growth rate using the X2019 scale, whereas our estimates here are from the X2007 scale, which  
 may contribute to the differences. We find that the IS, LNLG, and LNLGIS experiments show good agreement with the NOAA  
 425 estimate over this period. However, both the OG and LNLGOGIS experiments are found to have a high bias. This suggests that  
 there may be a spurious trend in the v10 OCO-2 ocean glint X<sub>CO<sub>2</sub></sub> retrievals of 0.04–0.13 ppm yr<sup>-1</sup> (OG experiment bias) that  
 impacts flux estimates from both experiments that assimilate ocean glint data.

Second, we estimate the overall ~~data-model~~observation-model agreement as the root-mean-square (RMS) error for the the  
 withheld in situ CO<sub>2</sub>, TCCON X<sub>CO<sub>2</sub></sub>, withheld OCO-2 land X<sub>CO<sub>2</sub></sub>, and withheld OCO-2 ocean X<sub>CO<sub>2</sub></sub> (Fig. 5). For the in situ  
 430 and OCO-2 data, the normalized RMS is shown, meaning that the ~~data-model~~observation-model difference is divided by  
 the observational uncertainty (one-sigma). Overall, we find reasonably good agreement between the evaluation datasets and  
 posterior fields for all experiments. The OG experiment gives the largest RMS errors against the withheld in situ CO<sub>2</sub>, TCCON

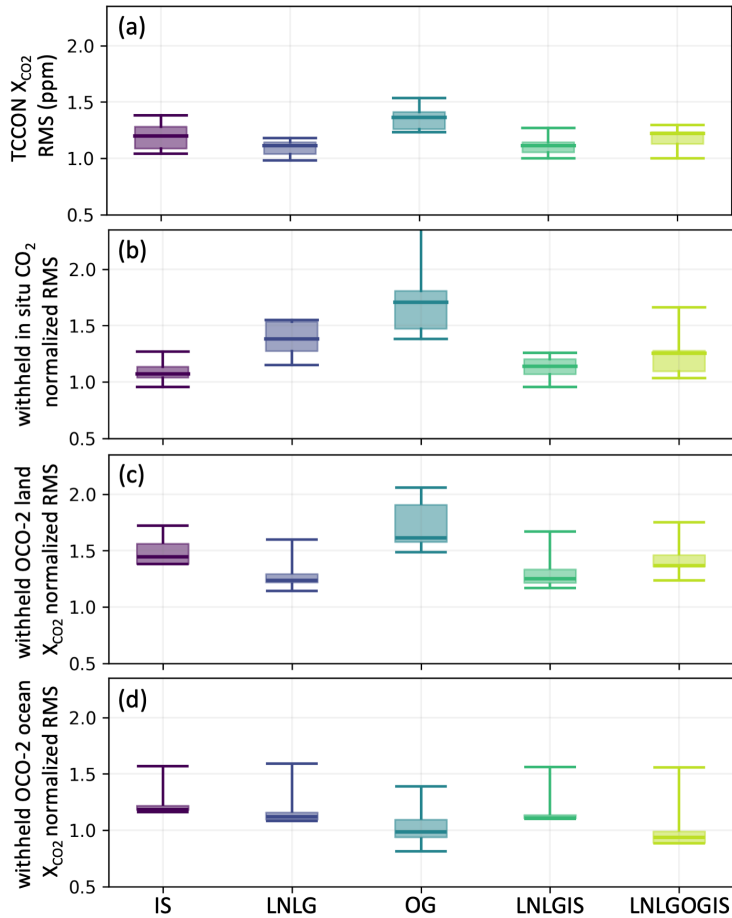

**Figure 5.** 2015–2020 root-mean-square (RMS) error between the v10 OCO-2 MIP experiments and (a) TCCON  $X_{\text{CO}_2}$  retrievals, (b) withheld in situ  $\text{CO}_2$  measurements, (c) withheld OCO-2 land  $X_{\text{CO}_2}$  retrievals, and (d) withheld OCO-2 ocean  $X_{\text{CO}_2}$  retrievals. For the comparisons with withheld in situ and OCO-2 observations, the normalized RMS estimate is plotted (that is, the  $\frac{\text{data} - \text{model}}{\text{observation} - \text{model}}$  mismatch is divided by the observational uncertainty). Note that NIES IS and CSU co-samples are not available and not included in this plot.

$X_{\text{CO}_2}$ , and OCO-2 land  $X_{\text{CO}_2}$ . This provides further evidence that the ocean glint data may have some residual biases that adversely impact the flux estimates.

435 Finally, we examine the mean bias over 2015–2020 for  $30^\circ$  latitude bins (Fig. 6). Similar to previous comparisons, we find that the OG experiment stands out as being more biased against the independent  $\frac{\text{data} - \text{observations}}{\text{observation} - \text{model}}$  relative to the other experiments. In particular, the  $\frac{\text{data} - \text{model}}{\text{observation} - \text{model}}$  difference for the OG experiment tends to be low (higher modeled  $\text{CO}_2$ ) than the evaluation datasets. This is particularly evident in the northern extratropics. Over  $30^\circ$ – $60^\circ$  N, where independent  $\frac{\text{data} - \text{observations}}{\text{observation} - \text{model}}$  are densest, we find that the OG ensemble median is biased by  $-0.69$  ppm against TCCON,  $-0.74$  ppm  
 440 against  $\frac{\text{withheld} - \text{withheld}}{\text{in situ}}$  in situ, and  $-0.48$  ppm against  $\frac{\text{withheld} - \text{withheld}}{\text{OCO-2 LNLG}}$  OCO-2 LNLG, suggesting a possible meridional bias



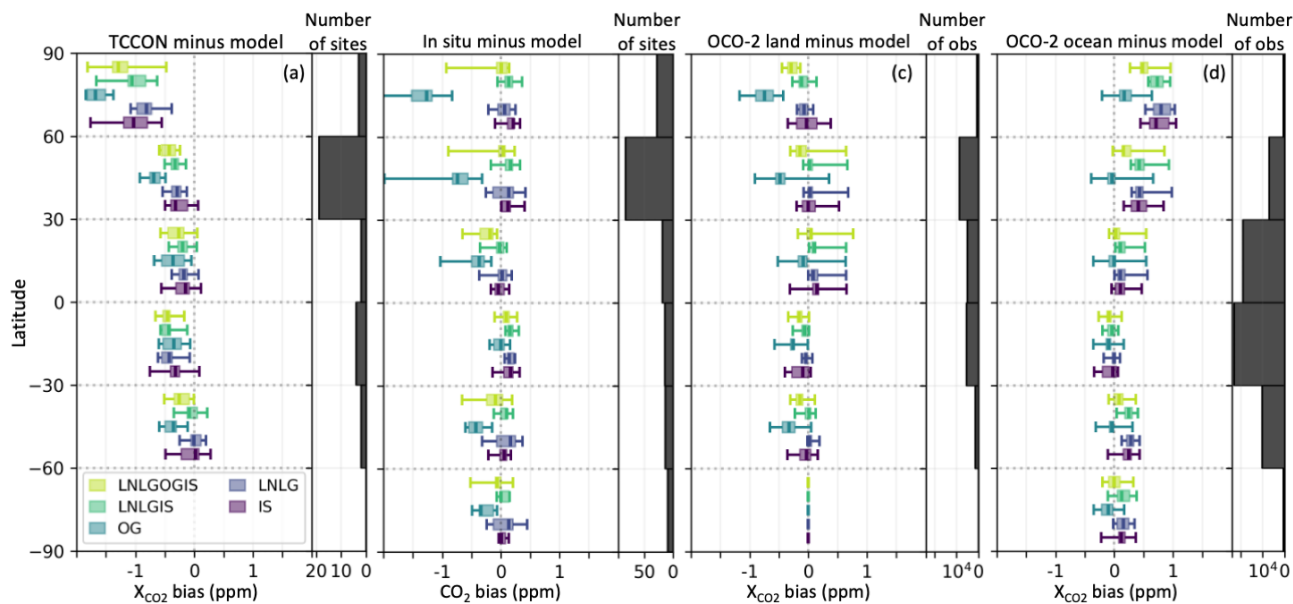

**Figure 6.** Median bias (data minus model) over 30° latitude bins averaged over 2015–2020 for (a) TCCON  $X_{CO_2}$  retrievals, (b) withheld in situ  $CO_2$  measurements, (c) withheld OCO-2 land  $X_{CO_2}$  retrievals, and (d) withheld OCO-2 ocean  $X_{CO_2}$  retrievals. Note that and NIES IS and CSU co-samples are not available and not included in this plot.

(higher retrieved  $X_{CO_2}$  than independent observations) in the OCO-2 ocean  $X_{CO_2}$  retrievals. The IS, LNLG, and LNLGIS experiments tend to show similar ~~data-model~~ observation-model differences, suggesting limited ability to distinguish between the performance of these inversions in large-scale features.

All experiments show some biases against TCCON sites. In particular, low biases (high modeled  $CO_2$ ) are found for 0°–  
 445 30° S and 60°–90° N. The underlying cause for these differences is unknown. Figure S3 shows the monthly-mean ~~data-model~~ observation-model differences for each TCCON site and each experiment. The differences can be quite variable between sites, but are generally similar between experiments (for IS, LNLG, and LNLGIS). Some of these differences may be related due to representativeness errors, particularly for urban sites. For example, Caltech and JPL are within Los Angeles County and show a large positive bias, while nearby Edwards is less impacted by urban emissions and shows a much smaller bias (Schuh et al.,  
 450 2021). However, other differences are harder to explain, such as a negative trend in the ~~data-model~~ observation-model bias for Park Falls and positive at Darwin during the 2015–2020 period. Site-to-site biases among TCCON sites may also contribute to these differences.

Overall, this analysis finds that the OG experiment shows the poorest agreement against the evaluation datasets (excluding the withheld ocean glint data). The LNLGOGIS experiment shows the second worst performance against evaluation datasets,  
 455 while the remaining experiments (IS, LNLG, and LNLGIS) all show good agreement against the evaluation data. These results suggest that there may be residual biases in the OCO-2 ocean glint dataset that adversely impact the OG and LNLGOGIS experiments.

## 4.2 Comparison of air–sea fluxes with pCO<sub>2</sub>-based estimates

The exchange of CO<sub>2</sub> between the atmosphere and the ocean (air–sea flux) can be estimated from measurements of the surface ocean partial pressure of CO<sub>2</sub> (pCO<sub>2</sub>). These pCO<sub>2</sub> data are extrapolated to global maps and combined with gas transfer velocity parameterizations to infer global maps of the air–sea CO<sub>2</sub> fluxes (Fay et al., 2021). Although significant uncertainties remain, particularly in accurately representing the gas transfer velocity (Fay et al., 2021), comparisons between the pCO<sub>2</sub>-based air–sea fluxes and v10 OCO-2 MIP experiments can inform possible biases between estimates and inform potential areas for future research.

Here, we compare v10 OCO-2 MIP air–sea fluxes to an ensemble of air–sea flux estimates from SeaFlux (Fay et al., 2021; Gregor and Fay, 2021). SeaFlux developed a standardized approach to harmonize and extend six air–sea CO<sub>2</sub> flux products from as many surface pCO<sub>2</sub> products: JENA-MLS (Rödenbeck et al., 2013), MPI-SOMFFN (Landschützer et al., 2014, 2020), CMEMS-FFN (Denvil-Sommer et al., 2019; Chau et al., 2022), CSIR-ML6 (Gregor et al., 2019), JMA-MLR (Iida et al., 2021), and NIES-FNN (Zeng et al., 2014). For each pCO<sub>2</sub> product, we examine the mean of three air–sea fluxes obtained using different wind reanalysis datasets to estimate the gas transfer parameterization (ERA5, JRA55, and CCMP2). The spread among these six estimates provides a measure of uncertainty in the extrapolation of pCO<sub>2</sub> data to a global grid, but does not account for errors in the gas transfer velocity formulation nor the uncertainties in the reanalysis winds used as input (Fay et al., 2021). Note that the prior estimates of air–sea CO<sub>2</sub> fluxes in v10 OCO-2 MIP experiments are generally pCO<sub>2</sub>-based flux estimates, and therefore not independent from the SeaFlux datasets.

Figure 7 shows the 2015–2019 mean air–sea fluxes for each of the six SeaFlux products and for the v10 OCO-2 MIP experiments across 30° latitude bands and large ocean regions. Over the global ocean, the pCO<sub>2</sub>-based air–sea fluxes tend to give stronger removals (median =  $-10.0 \text{ PgCO}_2 \text{ yr}^{-1}$  or  $-2.7 \text{ PgC yr}^{-1}$ , range =  $-0.2$  to  $-12.9 \text{ PgCO}_2 \text{ yr}^{-1}$  or  $-3.5$  to  $-2.5 \text{ PgC yr}^{-1}$ ) than the v10 OCO-2 MIP, which range from  $-7.9 \pm 1.9 \text{ PgCO}_2 \text{ yr}^{-1}$  ( $-2.1 \pm 0.5 \text{ PgC yr}^{-1}$ ) for the IS experiment to  $-10.2 \pm 1.28 \text{ PgCO}_2 \text{ yr}^{-1}$  ( $-2.8 \pm 0.4 \text{ PgC yr}^{-1}$ ) for the OG experiment. On regional scales, the v10 OCO-2 MIP experiments overlap with the pCO<sub>2</sub>-based estimates except for the northern high latitudes (60°–90° N), where pCO<sub>2</sub>-based estimates suggest a systematically larger removals. Similarly, the pCO<sub>2</sub>-based estimates tend to give greater removals over the southern midlatitudes (20°–50° S).

The different v10 OCO-2 MIP experiments tend to give similar air–sea fluxes, except for the OG experiment in the tropics. Although not systematic, the OG experiment suggests weaker emissions in the tropics of  $0.2 \pm 1.3 \text{ PgCO}_2 \text{ yr}^{-1}$  ( $0.05 \pm 0.34 \text{ PgC yr}^{-1}$ ) relative to the median pCO<sub>2</sub>-based estimate of  $1.6 \text{ PgCO}_2 \text{ yr}^{-1}$  ( $0.43 \text{ PgC yr}^{-1}$ ) with a range of 0.4 to  $1.8 \text{ PgCO}_2 \text{ yr}^{-1}$  ( $0.10$  to  $0.50 \text{ PgC yr}^{-1}$ ). Thus, similar to the evaluation of posterior CO<sub>2</sub> fields, the OG experiment is an outlier among the v10 OCO-2 MIP experiments, further supporting the possibility that residual biases may exist in the ocean glint X<sub>CO<sub>2</sub></sub> retrievals.

## 5 Metrics for interpreting country flux estimates

To aid users in interpreting top-down country-level flux estimates, we provide two metrics. The first metric is called the “Z statistic” and quantifies the statistical agreement between the IS and LNLG NCE estimates, and thus gives an indication of

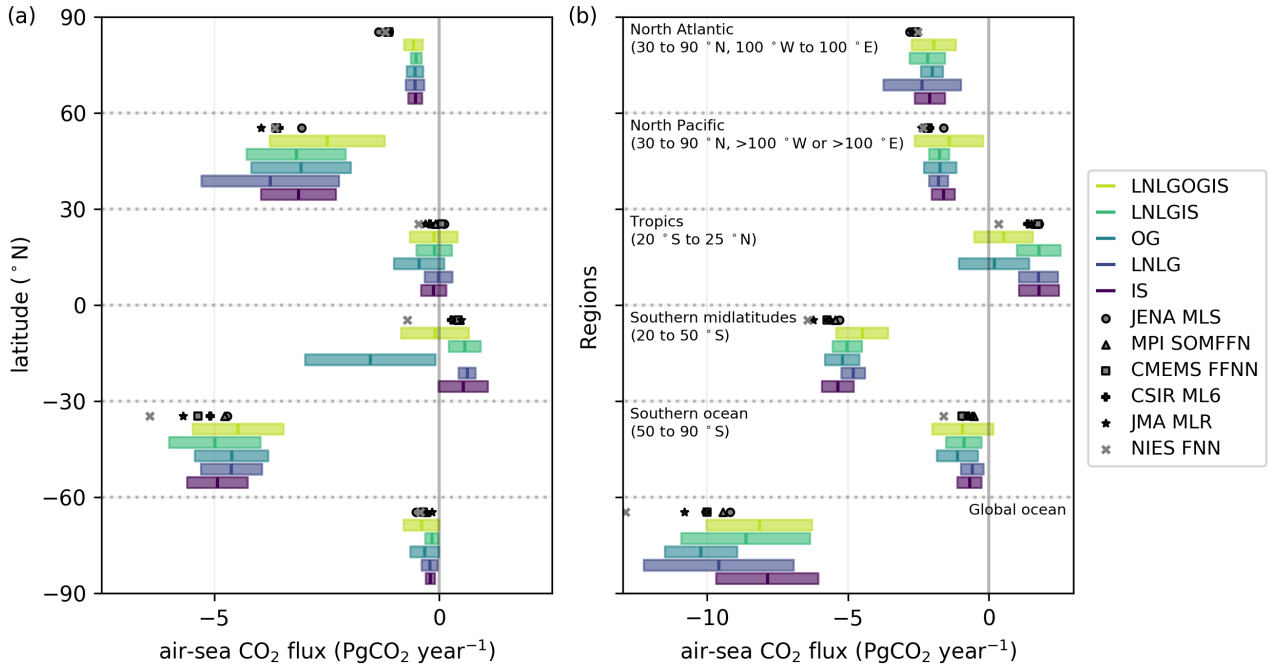

**Figure 7.** (a) Zonal-mean air–sea CO<sub>2</sub> flux (positive values represent flux towards atmosphere) for 30° increments of latitude based on 1° × 1° estimates averaged over 2015–2019. (b) air–sea CO<sub>2</sub> flux for six large ocean regions. Colored bars show the MIP experiment results (median +/- one standard deviation) and the symbols show the pCO<sub>2</sub>-based air–sea fluxes from the six SeaFlux products.

how robust flux estimates are across the v10 OCO-2 MIP experiments (Sect. 5.1). The second metric is called the Fractional Uncertainty Reduction (FUR) and informs the impact of the assimilated CO<sub>2</sub> data on the estimated fluxes (Sect. 5.2).

### 5.1 Z statistic

The Z statistic is defined as,

$$495 \quad Z \text{ statistic} = \frac{\overline{NCE}_{LNLG} - \overline{NCE}_{IS}}{std(\overline{NCE}_{LNLG} - \overline{NCE}_{IS})}, \quad (7)$$

where the denominator represents the standard deviation in  $\overline{NCE}_{LNLG} - \overline{NCE}_{IS}$  across the ensemble members. Differences in NCE and  $\Delta C_{\text{loss}}$  between v10 OCO-2 MIP experiments can be considerable. As an example, Fig. 8a shows that differences between  $\overline{NCE}_{LNLG}$  and  $\overline{NCE}_{IS}$  are notable for South America and Africa. The LNLG experiment gives more positive  $\Delta C_{\text{loss}}$  (carbon loss from land) over northern sub-Saharan Africa and northeast South America, but more negative  $\Delta C_{\text{loss}}$  over southern tropical Africa, southern and eastern South America, and southeast Asia. We examine the Z statistic (Fig. 8b) to quantify the statistical significance of these difference (magnitude greater than 1.96 indicates statistically significant differences at level  $\alpha = 0.05$ ). Most countries do not have statistically significant differences, indicating relatively good agreement between the IS

500

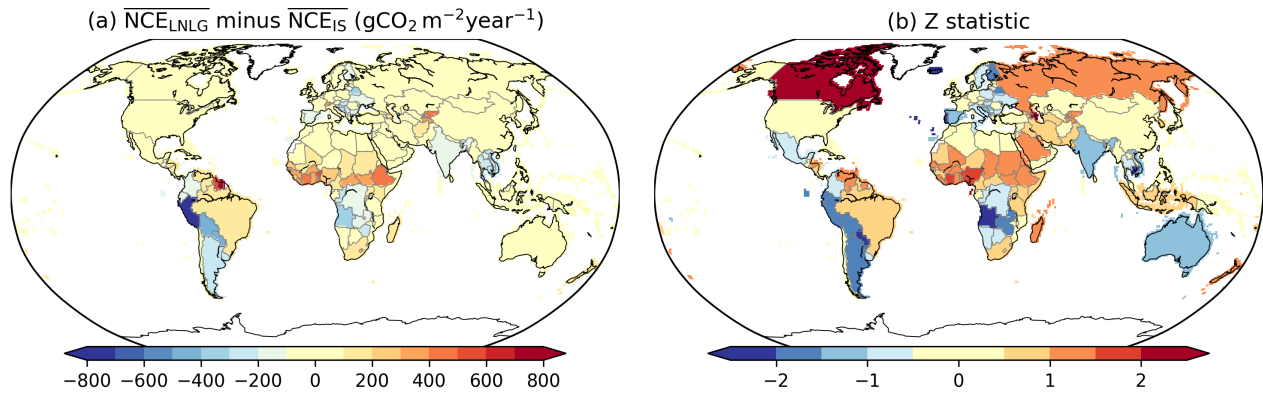

**Figure 8.** Difference between LNLG and IS experiments. (a)  $\overline{\text{NCE}}_{\text{LNLG}}$  minus  $\overline{\text{NCE}}_{\text{IS}}$ , and (b) The Z statistic (Eqn. 7) indicating the difference between LNLG and IS experiments.

and LNLG ensembles. Significant differences primarily occur in small to mid-sized tropical countries. Canada also shows a systematic difference driven by small uncertainties in the IS and LNLG estimates.

## 505 5.2 Fractional uncertainty reduction (FUR)

Byrne et al. (2022) reports the uncertainty in NCE as the standard deviation across v10 OCO-2 MIP ensemble members (estimated using Eqn. 4). This metric incorporates uncertainties related to model transport and aspects of the inversion configuration, such as optimization technique and a priori flux estimates. However, this metric is different to the uncertainty metric usually computed in a Bayesian framework, that is, the Bayesian posterior uncertainty. That uncertainty quantifies the impact of errors in the observations and prior constraints on the posterior flux estimates. The Bayesian posterior uncertainty is not reported for practical reasons, as the majority of contributing models do not calculate this quantity, so it is not possible to calculate this quantity across the ensemble.

In this section, we examine the posterior uncertainty estimates from two contributing inversion systems (CAM5 and TM5-4DVar) and compare these estimates to the ensemble-based uncertainty estimate provided with the dataset. Then, we define the ~~metric of Fractional Uncertainty Reduction (FUR)~~ FUR metric between the posterior and prior NCE estimates based on the TM5-4DVar model (as CAM5 does not estimate uncertainties for the LNLGIS and LNLGOGIS experiments), which can be used to understand the relative impact of assimilated atmospheric CO<sub>2</sub> data on estimates of country-level NCE and  $\Delta C_{\text{loss}}$ .

Both CAM5 and TM5-4DVar estimate CO<sub>2</sub> fluxes using four-dimensional variational assimilation (4D-Var) and estimate posterior uncertainty estimates using a Monte Carlo method derived by Chevallier et al. (2007). The realism of the prior and posterior CAM5 uncertainty estimates have already been the topic of several studies (see Chevallier, 2021, and references therein). Figure 9 shows the ensemble-based uncertainty, prior/posterior uncertainty from CAM5 (prior, IS and LNLG only) and prior/posterior uncertainty from TM5-4DVar for four countries. Notably, the magnitudes of the prior/posterior uncertainties from CAM5 and TM5-4DVar are quite different, with CAM5 uncertainties being 2–8 times larger. Differences in prior/posterior

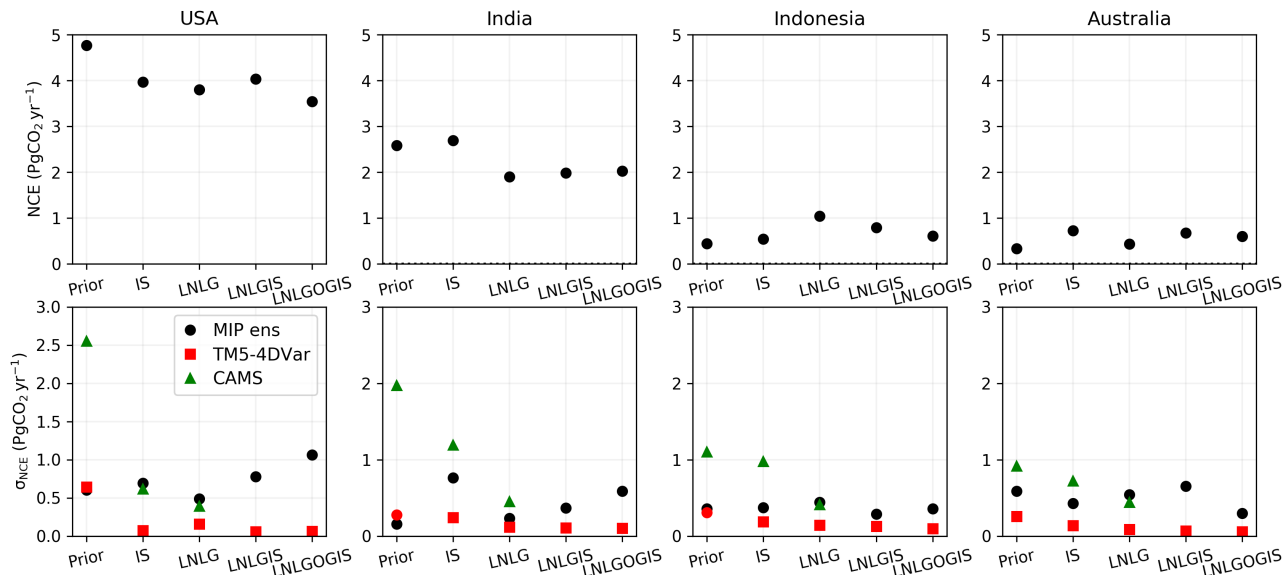

**Figure 9.** (top)  $\overline{NCE}$  and (bottom)  $\sigma_{NCE}$  for four countries in 2018. The v10 OCO-2 MIP ensemble spread-based error estimate is shown in black, the TM5-4DVar Bayesian uncertainty estimate is shown in red, and the CAMS Bayesian uncertainty estimate is shown in green (only for Prior, IS, and LNLG).

rrior uncertainties of this magnitude are not unusual among inversion systems, and highlight the sensitivity of Bayesian uncertainty estimates to choices about prior uncertainties. Both CAMS and TM5-4DVar posterior uncertainties are smaller relative to their prior by similar amounts, driven by the assimilated CO<sub>2</sub> data. The magnitude of the ensemble-based uncertainty tends to fall in-between the CAMS and TM5-4DVar estimates. However, the CAMS and TM5-4DVar posterior uncertainty estimates decrease as more data are assimilated (as expected), while the ensemble spread does not. In fact, the ensemble spread increases with data density in some cases (e.g., Australia LNLGIS). Thus, overall, we find that the ensemble-based uncertainty estimate is of similar magnitude to the prior/posterior estimate, but that the magnitude of posterior uncertainty is quite dependent on the assumed prior uncertainty.

We now calculate the FUR metric in NCE from the TM5-4DVar Bayesian uncertainties (note that we use TM5-4DVar only because CAMS does not report LNLGIS or LNLGOGIS uncertainties). FUR is calculated from the prior flux standard deviation ( $\sigma_{\text{prior}}$ ) and posterior flux standard deviation ( $\sigma_{\text{posterior}}$ ) as:

$$FUR = 1 - \frac{\sigma_{\text{posterior}}}{\sigma_{\text{prior}}} \quad (8)$$

This quantity ranges between 0 and 1, with larger values indicating that the Bayesian uncertainties have decreased more (relative to the prior) due to the observational constraints from assimilated data. This metric is useful for understanding how the assimilation of data influences the NCE and  $\Delta C_{\text{loss}}$  estimates, which may not be captured by the ensemble spread. For example, Saudi Arabia has a small NCE uncertainty estimate but this is largely driven by prior knowledge that biosphere CO<sub>2</sub> fluxes and the atmospheric CO<sub>2</sub> data has little impact on the NCE estimate.

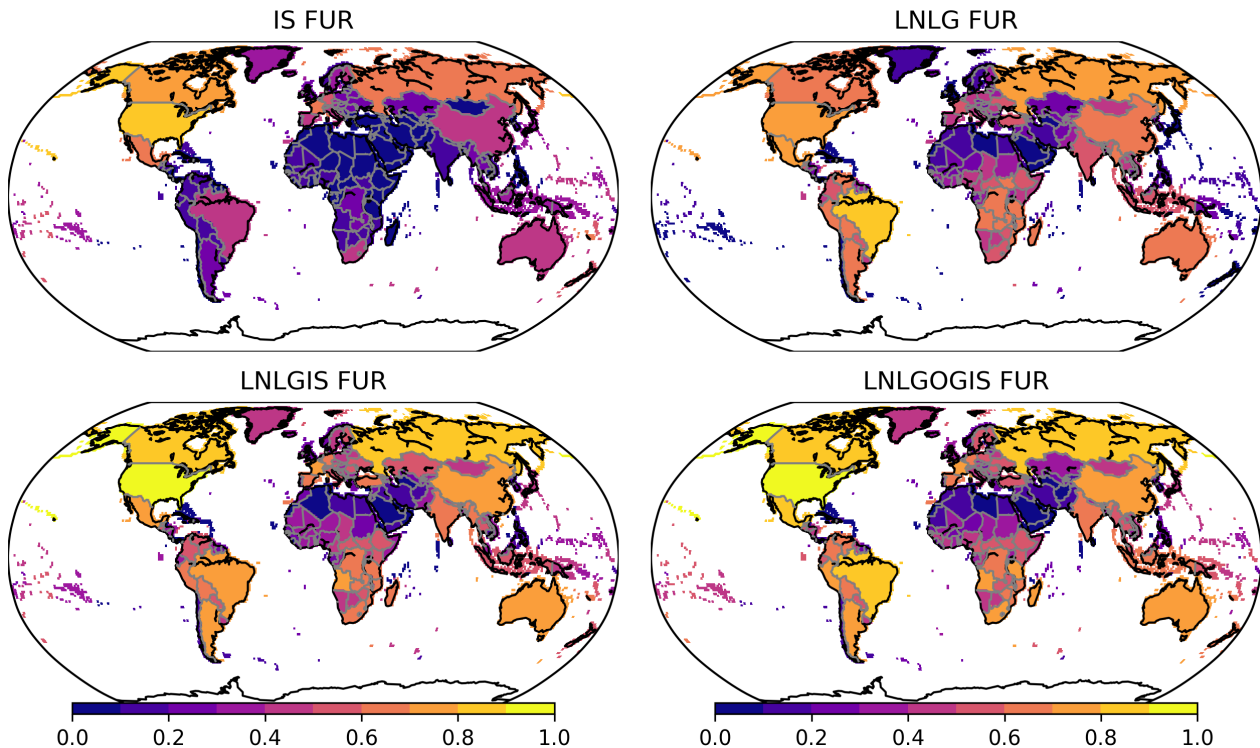

**Figure 10.** Estimate of the Fractional Uncertainty Reduction (FUR) on the v10 OCO-2 MIP estimates for each experiment based on Bayesian uncertainty estimates from the TM5-4DVar inversion.

Figure 10 shows FUR for the IS, LNLG, LNLGIS, and LNLGOGIS experiments. FUR is larger in regions with denser observational coverage. For example, the IS FUR is close to 1 in the USA and parts of Europe, reflecting dense CO<sub>2</sub> measurements, but it remains small for many tropical countries, where sampling is sparse. Meanwhile, the LNLG experiment generally has larger FUR values than the IS experiment in the tropics, reflecting denser sampling, but has lower values for some small high-latitude countries, such as in Scandinavia.

## 6 Dataset description

The dataset described in this paper, Byrne et al. (2022), provides annual totals of country-level and  $1^\circ \times 1^\circ$  gridded  $\Delta C_{\text{loss}}$ , NBE, NCE,  $F_{\text{rivers export}}$ , and the combined  $F_{\text{crop trade}} + F_{\text{wood trade}}$  fluxes, as well as their uncertainties over 2015–2020. In addition, the country-level Z statistic (Eqn. 7) and FUR (Eqn. 8) metrics are provided to help interpret the flux and stockchange estimates. These data are provided for the v10 OCO-2 MIP IS, LNLG, LNLGIS, and LNLGOGIS experiments. The OG experiment is excluded due to poor evaluation against independent CO<sub>2</sub> measurements and pCO<sub>2</sub>-based air–sea fluxes, likely due to residual X<sub>CO<sub>2</sub></sub> biases in the OCO-2 ocean glint X<sub>CO<sub>2</sub></sub> retrievals (Sect. 4). We note that biases in ocean glint X<sub>CO<sub>2</sub></sub> retrievals will also adversely impact flux estimates from the LNLGOGIS, and caution against using these data when they show

differences from the IS, LNLG, and LNLGIS experiments. Future improvements to the OCO-2  $X_{\text{CO}_2}$  retrievals are expected to reduce residual  $X_{\text{CO}_2}$  biases and thus the quality of the LNLGOGIS experiment is expected to improve in future OCO-2 MIP experiments.

For the  $1^\circ \times 1^\circ$  gridded dataset, we emphasize that caution is needed in interpreting these data. As discussed in Sect. 1.3, atmospheric  $\text{CO}_2$  inversion analyses provide the best constraints on the largest spatial scales (e.g., continental-to-global). The confidence in these top-down estimates decreases at smaller spatial scales. The minimum spatial resolution for robust flux estimates is dependent on the density and precision of the measurements, and is challenging to quantify. However, scales smaller than France or Germany in geographic extent are unlikely to be meaningfully constrained. Thus, we recommend only using  $1^\circ \times 1^\circ$   $\text{CO}_2$  fluxes aggregated to larger spatial scales. In aggregating, we recommend propagating uncertainties by assuming first 100% correlation (sum of the  $1^\circ \times 1^\circ$  uncertainties) and then 0% correlation (square root of the sum of the squared uncertainties) between grid cells. We strongly encourage contacting the authors before using the gridded  $1^\circ \times 1^\circ$  dataset.

These data are available for download from the Committee on Earth Observation Satellites' (CEOS) website: <https://doi.org/10.48588/npf6-sw92>. The country-level data are available for download as comma-separated values (CSV), Network Common Data Form (NetCDF) and Microsoft Excel worksheet files. The  $1^\circ \times 1^\circ$  gridded dataset is available as a NetCDF file.

## 7 Characteristics of the dataset

Globally, over 2015–2020, we report FF emissions of  $35.79 \pm 1.50 \text{ PgCO}_2 \text{ yr}^{-1}$  ( $9.76 \pm 0.41 \text{ PgC yr}^{-1}$ ),  $F_{\text{rivers export}}$  of  $-3.35 \pm 0.59 \text{ PgCO}_2 \text{ yr}^{-1}$  ( $-0.91 \pm 0.16 \text{ PgC yr}^{-1}$ ), and globally balanced  $F_{\text{crop trade}}$  and  $F_{\text{wood trade}}$ . Table 4 gives the global annual mean changes in the atmospheric burden of  $\text{CO}_2$ ,  $\Delta C_{\text{gain}}$  and ocean sequestration. Across the experiments, the median fraction of fossil fuel emissions remaining in the atmosphere is 55–56%, while 32–36% is sequestered by the ocean and 9–13% is sequestered by terrestrial ecosystems. Note that this omits land use change (LUC) emissions of  $\sim 3.85 \text{ PgCO}_2 \text{ yr}^{-1}$  ( $\sim 1.05 \text{ PgC yr}^{-1}$ , Friedlingstein et al., 2022), which are compensated for by additional carbon uptake by land. Of the combined FF+LUC emissions, 50% remains in the atmosphere, 29–33% is sequestered by the ocean and 18–21% is sequestered by terrestrial ecosystems. Relative to Global Carbon Budget 2021 (GCB 2021; Friedlingstein et al., 2022) we find 2.24–3.53  $\text{PgCO}_2 \text{ yr}^{-1}$  ( $0.61\text{--}0.96 \text{ PgC yr}^{-1}$ ) less removal by land (mean/median difference) but greater removal by the ocean of 0.87–2.24  $\text{PgCO}_2 \text{ yr}^{-1}$  ( $0.24\text{--}0.61 \text{ PgC yr}^{-1}$ ), however, these difference are consistent within one standard deviation of the mean/median values. Interestingly, we report greater removals by the ocean than GCB 2021 but reduced air–sea flux relative to SeaFlux. This can be explained by the fact that  $\text{pCO}_2$ -based air–sea flux estimates generally give larger mean ocean carbon uptake than model estimates (Fay and McKinley, 2021) and that we estimate a larger  $F_{\text{rivers export}}$  than GCB 2021.

Meridionally, NCE is largest in the northern extratropics, coinciding with the largest FF emissions (Fig. 11). However, the northern extratropics also show negative  $\Delta C_{\text{loss}}$ , implying increasing terrestrial carbon stocks, particularly between  $30^\circ\text{--}60^\circ \text{ N}$ . NCE is less positive in the tropics, primarily due to lower FF emissions. However, this region tends to show neutral-to-positive

**Table 4.** 2015-2020 global mean atmospheric increase, terrestrial carbon gain ( $\Delta C_{\text{gain}}$ ) and ocean carbon gain from the IS, LNLG, LNLGIS, and LNLGOGIS experiments (mean/median  $\pm$  one standard deviation). Positive values of  $\Delta C_{\text{gain}}$  and ocean carbon gain indicate increases in carbon stocks. GCB 2021 were obtained from the Global Carbon Budget 2021 (Friedlingstein et al., 2022) with  $\Delta C_{\text{gain}}$  calculated as the difference between the land sink and land-use change emissions with errors propagated in quadrature.

| Experiment | Atmosphere                                                                                 | $\Delta C_{\text{gain}}$                                                                  | Ocean carbon gain                                                                          |
|------------|--------------------------------------------------------------------------------------------|-------------------------------------------------------------------------------------------|--------------------------------------------------------------------------------------------|
| IS         | $19.73 \pm 0.19 \text{ PgCO}_2 \text{ yr}^{-1}$<br>( $5.38 \pm 0.05 \text{ PgC yr}^{-1}$ ) | $4.58 \pm 2.44 \text{ PgCO}_2 \text{ yr}^{-1}$<br>( $1.25 \pm 0.66 \text{ PgC yr}^{-1}$ ) | $11.35 \pm 2.01 \text{ PgCO}_2 \text{ yr}^{-1}$<br>( $3.10 \pm 0.55 \text{ PgC yr}^{-1}$ ) |
| LNLG       | $19.64 \pm 0.09 \text{ PgCO}_2 \text{ yr}^{-1}$<br>( $5.36 \pm 0.02 \text{ PgC yr}^{-1}$ ) | $3.29 \pm 2.93 \text{ PgCO}_2 \text{ yr}^{-1}$<br>( $0.90 \pm 0.80 \text{ PgC yr}^{-1}$ ) | $12.91 \pm 2.63 \text{ PgCO}_2 \text{ yr}^{-1}$<br>( $3.52 \pm 0.72 \text{ PgC yr}^{-1}$ ) |
| LNLGIS     | $19.64 \pm 0.06 \text{ PgCO}_2 \text{ yr}^{-1}$<br>( $5.36 \pm 0.02 \text{ PgC yr}^{-1}$ ) | $4.19 \pm 2.77 \text{ PgCO}_2 \text{ yr}^{-1}$<br>( $1.14 \pm 0.75 \text{ PgC yr}^{-1}$ ) | $11.98 \pm 2.32 \text{ PgCO}_2 \text{ yr}^{-1}$<br>( $3.27 \pm 0.64 \text{ PgC yr}^{-1}$ ) |
| LNLGOGIS   | $19.97 \pm 0.18 \text{ PgCO}_2 \text{ yr}^{-1}$<br>( $5.45 \pm 0.05 \text{ PgC yr}^{-1}$ ) | $4.03 \pm 2.36 \text{ PgCO}_2 \text{ yr}^{-1}$<br>( $1.10 \pm 0.64 \text{ PgC yr}^{-1}$ ) | $11.54 \pm 1.79 \text{ PgCO}_2 \text{ yr}^{-1}$<br>( $3.15 \pm 0.49 \text{ PgC yr}^{-1}$ ) |
| GCB 2021   | $19.8 \pm 0.73 \text{ PgCO}_2 \text{ yr}^{-1}$<br>( $5.39 \pm 0.2 \text{ PgC yr}^{-1}$ )   | $6.82 \pm 3.15 \text{ PgCO}_2 \text{ yr}^{-1}$<br>( $1.86 \pm 0.86 \text{ PgC yr}^{-1}$ ) | $10.67 \pm 1.83 \text{ PgCO}_2 \text{ yr}^{-1}$<br>( $2.91 \pm 0.5 \text{ PgC yr}^{-1}$ )  |

$\Delta C_{\text{loss}}$ , suggesting that terrestrial carbon stocks may be decreasing. The LNLG and IS results also differ most in the tropics, with LNLG suggesting greater terrestrial carbon stock loss over  $0^\circ$ – $30^\circ$  N but less over  $0^\circ$ – $30^\circ$  S. The differences in  $\text{CO}_2$  fluxes between these experiments are not well understood, and both experiments evaluate well against independent [data-observations](#)

590 (Sect. 4).

The spatial distribution of NCE over 2015–2020 at  $1^\circ \times 1^\circ$  and aggregated to country-scale for the LNLGIS experiment is shown in Fig. 12. At  $1^\circ \times 1^\circ$  (Fig. 12a-b), localized fossil fuel emissions are visible, generally corresponding to urban areas and industrialized regions. These emissions are interspersed over broad source and sink structures that are driven by biosphere removals or emissions. Land biosphere removal is most evident across the northern mid-high latitudes. In contrast, tropical removals and emissions are more regional. When NCE is aggregated to the country-scale (Fig. 12c-d), most countries are net sources driven by fossil fuel emissions, particularly in the northern extratropics. Figure 12e-f shows the 2015–2020 mean country-level  $\Delta C_{\text{loss}}$  for the LNLGIS experiment. Increasing terrestrial carbon stocks (negative  $\Delta C_{\text{loss}}$ ) is found for most extratropical countries, while tropical countries can have gains or losses. Notably, the uncertainty in  $\Delta C_{\text{loss}}$  is larger in the tropics, particularly for mid-sized countries. Overall, small to mid-sized countries generally have uncertainties comparable to the magnitude of  $\Delta C_{\text{loss}}$ , reflecting the fact that atmospheric  $\text{CO}_2$  measurements best constrain fluxes over large scales. Spatial maps of NCE and  $\Delta C_{\text{loss}}$  for each experiment are shown in the supplementary materials (Fig. S4-7).

600

Differences in NCE and  $\Delta C_{\text{loss}}$  between the v10 OCO-2 MIP experiments can be considerable (the statistical significance of these differences is quantified by the Z statistic, see Sect. 5.1). The underlying cause of differences between the v10 OCO-2 MIP



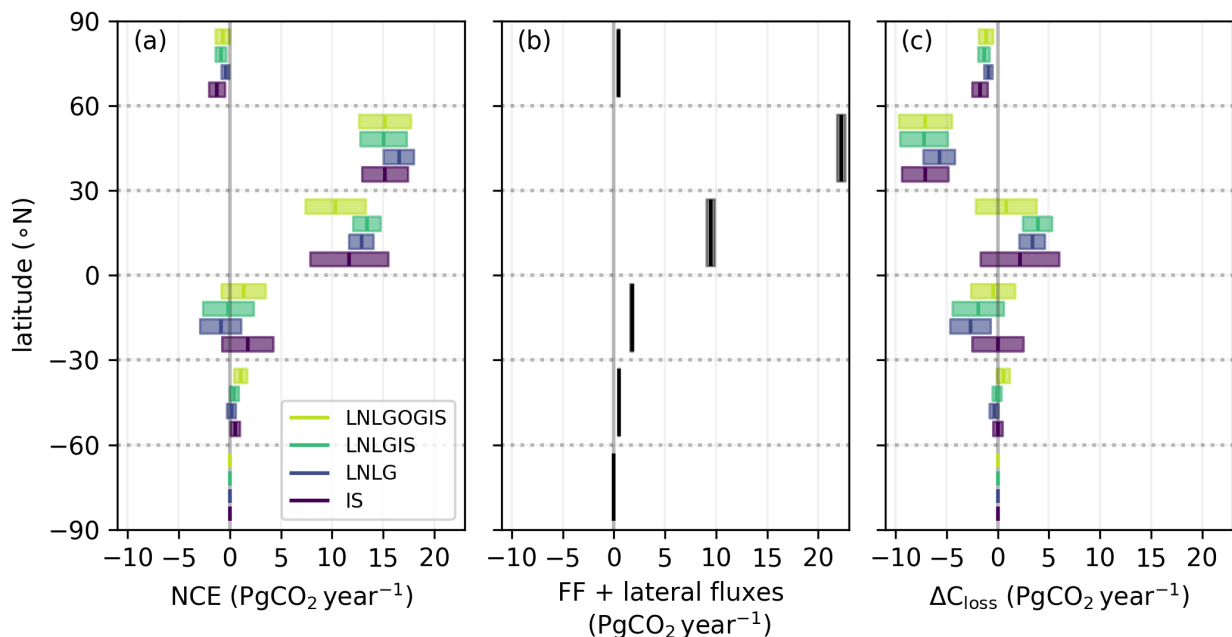

**Figure 11.** Zonal-mean (a) NCE, (b) FF + lateral fluxes, and (c)  $\Delta C_{\text{loss}}$  for  $30^\circ$  increments of latitude based on  $1^\circ \times 1^\circ$  estimates averaged over 2015–2020. IS, LNLG, LNLGIS and LNLGOGIS median estimates are shown by solid lines and one-sigma uncertainties are shown by the shaded region.

experiments are not well understood, but the differences are likely impacted by the different spatial and temporal distribution of LNLG and IS measurements (see [See Sect. 5.2](#)), model transport errors (Stephens et al., 2007; Schuh et al., 2019, 2022) and residual retrieval biases in the OCO-2  $X_{\text{CO}_2}$  retrievals (Peiro et al., 2022). Unfortunately, the regions showing the largest differences in fluxes generally have few independent atmospheric  $\text{CO}_2$  measurements for validation, limiting our ability to distinguish between different causes. Thus, we believe that NCE and  $\Delta C_{\text{loss}}$  estimates are most reliable when agreement is found across the v10 OCO-2 MIP experiments.

We will now show examples of carbon budgets for four countries from this dataset. Figure 13 shows the 2015–2020 mean FF,  $F_{\text{rivers export}}$ ,  $F_{\text{crop trade}}$ ,  $F_{\text{wood trade}}$ ,  $\Delta C_{\text{loss}}$ , and NCE fluxes for the USA, India, Indonesia, and Australia. All of the  $\text{CO}_2$  fluxes on the left of the dashed line combine to give the NCE flux constrained by the v10 OCO-2 MIP experiments. We find that FF is the strongest contributor to NCE for all countries, but that  $\Delta C_{\text{loss}}$  also plays a strong modulating role. For example, negative  $\Delta C_{\text{loss}}$  (increasing terrestrial carbon stocks) for the USA reduces NCE to be less than would be expected given the FF emissions. Conversely, Indonesia has positive  $\Delta C_{\text{loss}}$  (decreasing terrestrial carbon stocks), resulting in increased NCE relative to FF. Some countries also show differences in  $\Delta C_{\text{loss}}$  between v10 OCO-2 MIP experiments. For example, the LNLG and LNLGIS experiments suggest negative  $\Delta C_{\text{loss}}$  for India, while the IS suggest  $\Delta C_{\text{loss}}$  is roughly neutral. Figures of carbon budgets for 28 additional countries (Fig. S8) and 14 regions (Fig. S9) are shown in the supplementary materials.

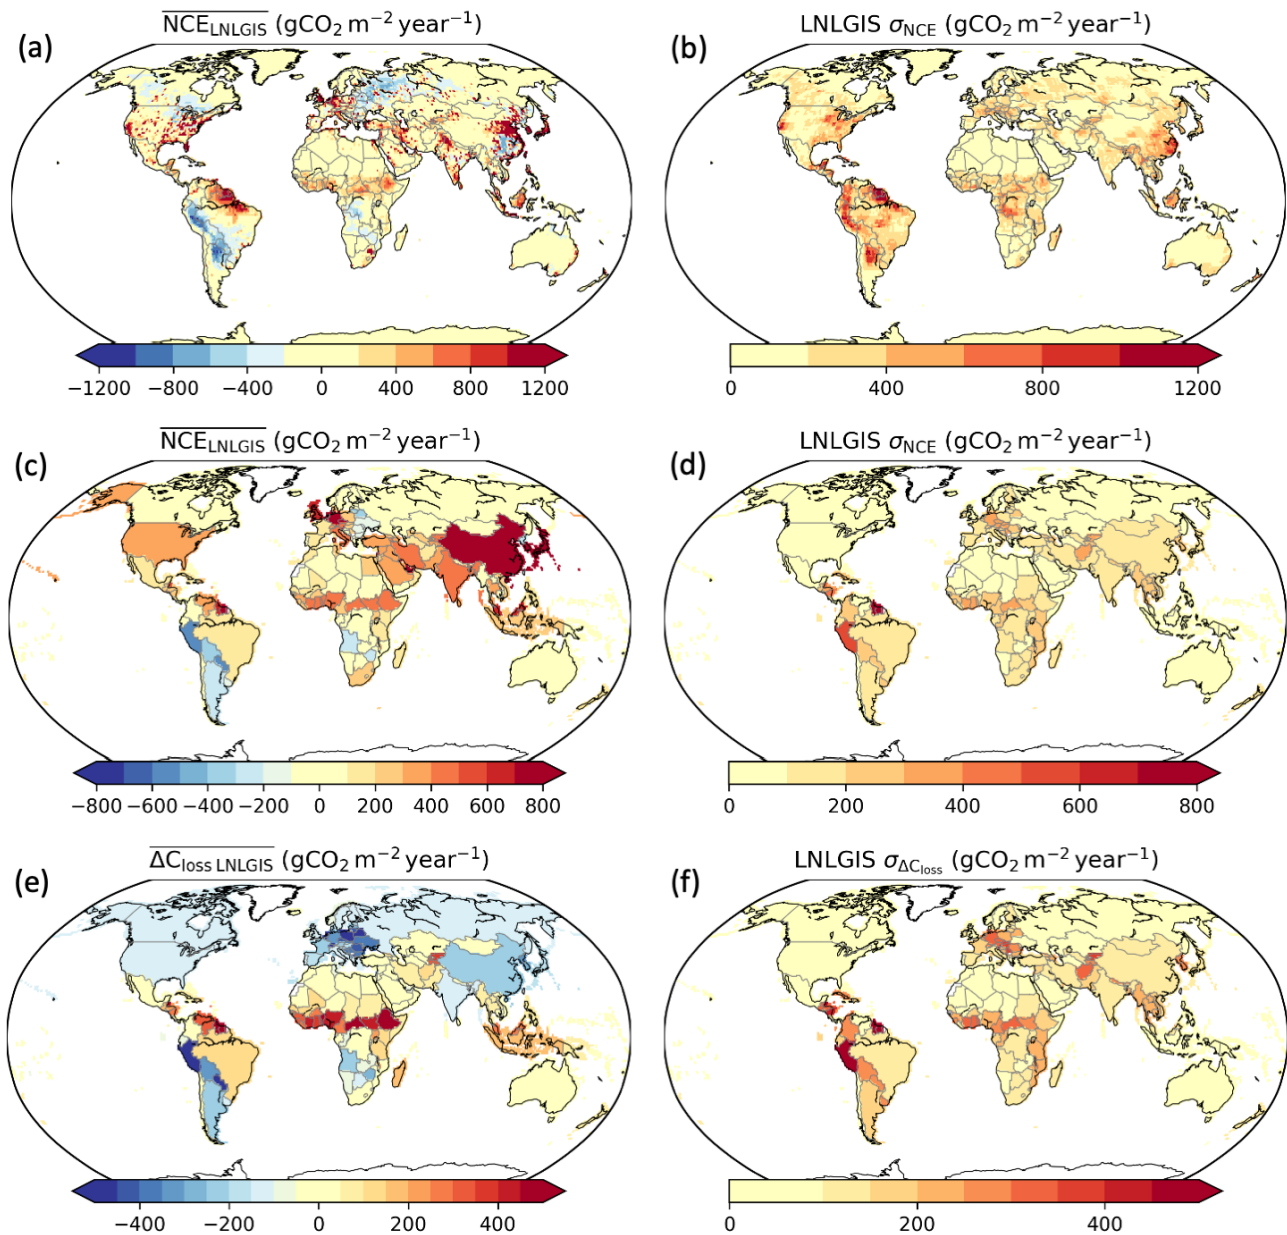

**Figure 12.** Median ( $\overline{NCE}$ ) and one standard deviation ( $\sigma_{NCE}$ ) of NCE on a (a-b)  $1^\circ \times 1^\circ$  grid and (c-d) aggregated to country-scale for the v10 OCO-2 MIP LNLGIS experiment averaged over 2015–2020. (e-f) Median and one standard deviation of country-scale  $\Delta C_{loss}$  averaged over 2015–2020 derived from the LNLGIS v10 OCO-2 MIP experiment.

The carbon budgets can also be examined for individual years (Fig. 14). Both Indonesia and Australia show considerable variations in  $\Delta C_{loss}$  that drive variations in NCE over this period. Indonesia has a large positive  $\Delta C_{loss}$  in 2015, driven

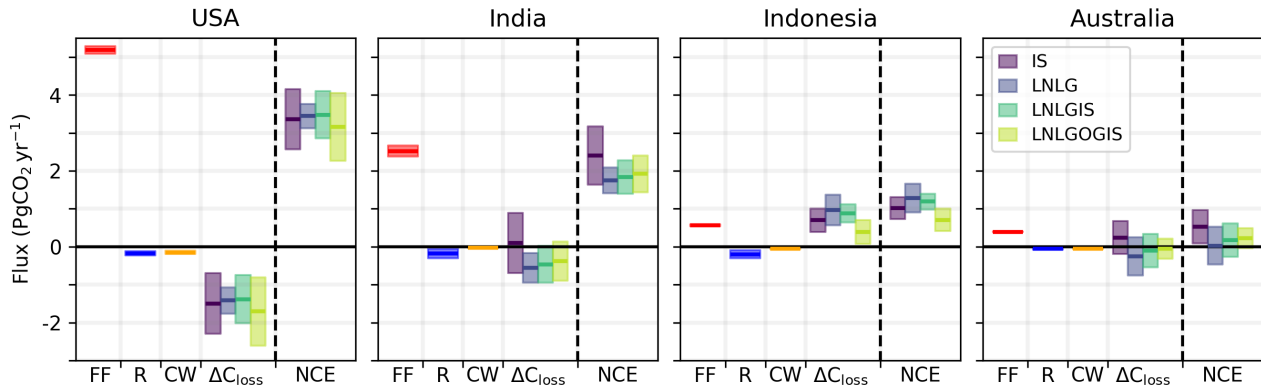

**Figure 13.** CO<sub>2</sub> budget for the USA, India, Indonesia, and Australia averaged over 2015–2020. Bars show the median +/- one standard deviation of FF,  $F_{\text{rivers export}}$  (R),  $F_{\text{crop trade}}+F_{\text{wood trade}}$  (CW),  $\Delta C_{\text{loss}}$ , and NCE (note that these quantities are related through Eqn. 2).

by warm-dry weather and fires during 2015 El Niño (Yin et al., 2016). Australia showed strong negative  $\Delta C_{\text{loss}}$  (except for IS) during 2016, which was the 15th wettest year on record (precipitation 17% above average; Bureau Of Meteorology, 2017). Australia also showed anomalous positive  $\Delta C_{\text{loss}}$  during 2019, which was the warmest and driest year on record, with considerable terrestrial carbon loss related to biomass burning in the southeast (Byrne et al., 2021). Variations in NCE are also  
625 found related to FF emissions. In particular, a reduction in NCE is found for 2019 and 2020 in the USA that is primarily linked to a reduction in FF emissions rather than  $\Delta C_{\text{loss}}$ . Timeseries of NCE and  $\Delta C_{\text{loss}}$  for 28 additional countries (Fig. S10, S11) and 14 regions (Fig. S12, S13) are shown in the supplementary materials.

## 8 Comparison with national inventories

Here we demonstrate how the dataset presented here can be compared with NGHGs reported under the UNFCCC, which were  
630 downloaded from [https://di.unfccc.int/flex\\_annex1](https://di.unfccc.int/flex_annex1). We also refer the reader to Chapter 6.10.2 in Volume 1 of IPCC (2019) for additional discussion of comparing top-down estimates with NGHGs. The fossil fuel emissions in Byrne et al. (2022) can be compared with the combined emissions from the energy and IPPU (Energy+IPPU) categories. In both cases, these estimates account for anthropogenic CO<sub>2</sub> emissions from the burning of fossil fuels and production of cement and other materials. We expect these estimates to generally be in good agreement, as they are similarly based on bottom-up accounting for national  
635 totals. However, the estimates may diverge when there is missing activity data, particularly in non-annex 1 countries and more recent years (Andrew, 2020).

$\Delta C_{\text{loss}}$  can be compared to the combined emissions and removals from the agriculture, LULUCF, and waste (Agr+LULUCF+Waste) categories. These quantities are not identical, with the most important difference being that NGHGs are only for managed land, while  $\Delta C_{\text{loss}}$  includes both managed and unmanaged lands. Therefore, caution is needed for parties with large unmanaged  
640 land areas (e.g., Canada or the Russian Federation). Another difference from NGHGs is that  $\Delta C_{\text{loss}}$  implicitly includes

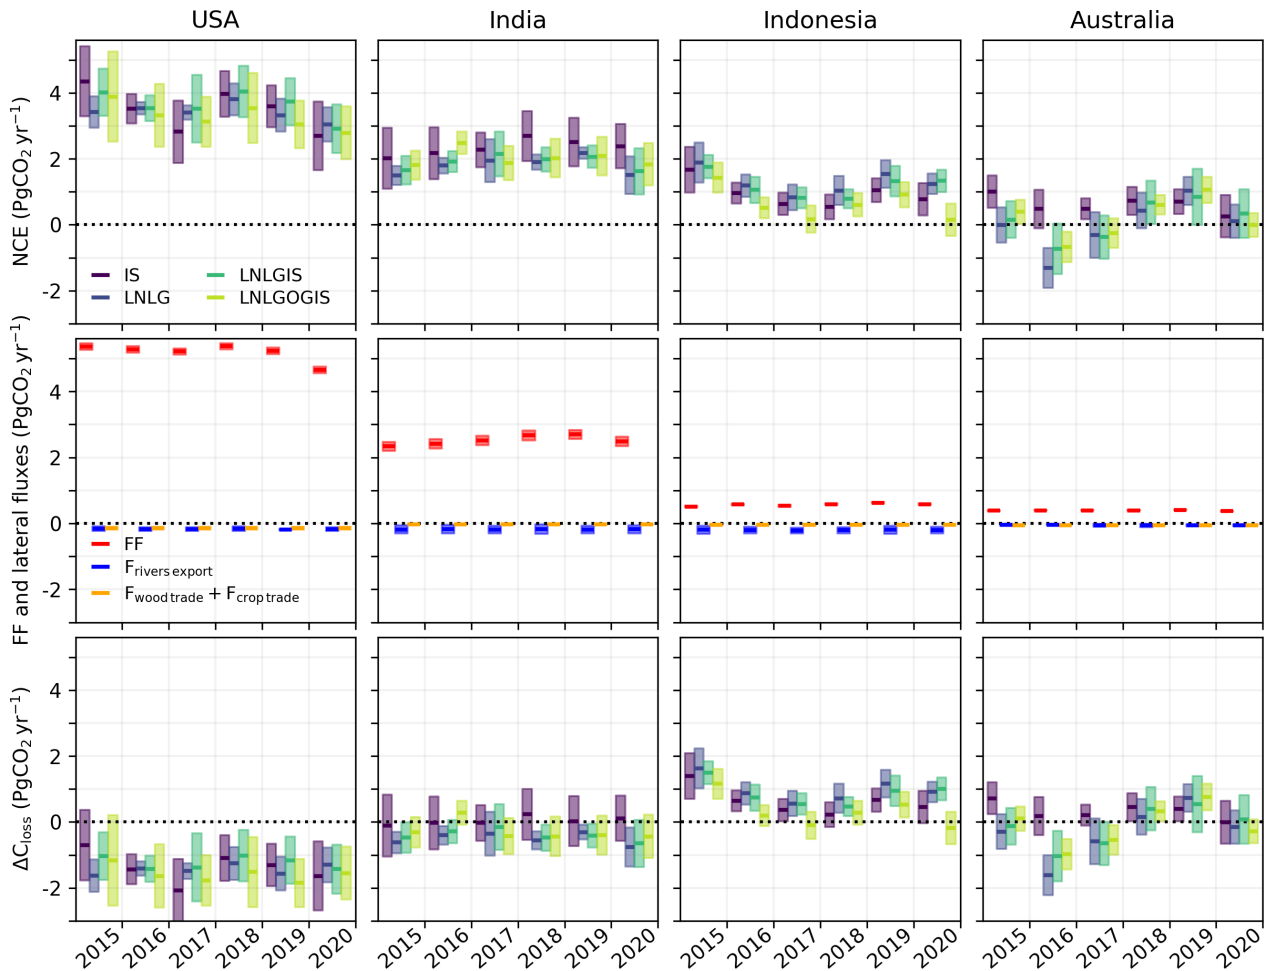

**Figure 14.** Timeseries of the carbon budget for the USA, India, Indonesia, and Australia. Solid lines show the median estimates and shaded areas show +/- one standard deviation.

deposition of carbon in water body sediments within a country (such as lakes). However, this is expected to be a small contribution. Similarly, volcanic CO<sub>2</sub> emissions are implicitly included in  $\Delta C_{\text{loss}}$ , but are also believed to be small contributions (global subaerial volcanic CO<sub>2</sub> emissions are  $\sim 0.05 \text{ PgCO}_2 \text{ yr}^{-1}$ , Fischer et al., 2019). It is worth noting that NGHGs require estimates of turnover times for wood products in producing countries, as these can have lifetimes of decades to centuries (see Appendix 3a.1 of Penman et al., 2003). No such estimate is needed for the top-down methods as emissions from decaying wood products will be implicitly incorporated in NCE. Therefore, top-down methods only need to account for the lateral movement of wood products from the region where the carbon is sequestered to the region where the wood products are used and decompose.

645

650 For this analysis, we compare NGHGI and our dataset for three entities: the USA, European Union plus the United Kingdom (EU27+UK), and Australia. These were chosen for two reasons. First, NCE is better constrained by atmospheric CO<sub>2</sub> data over these relatively large regions. This is reflected in the FUR metric, which gives values of 0.76–0.91 for the USA (meaning a 76–91% uncertainty reduction), 0.38–0.51 for EU27, and 0.45–0.78 for Australia. Second, each of these entities has small unmanaged land areas, making this more of an apples-to-apples comparison. 95% of the USA is managed, with most unmanaged land being in the state of Alaska (Ogle et al., 2018). Similarly, all land in the EU27+UK is considered managed  
655 except for 5% of France’s territory (Petrescu et al., 2021).

Figure 15 shows timeseries of emissions and removals from NGHGI and Byrne et al. (2022) over 2015–2020. We focus our analysis on the 2015–2020 mean estimates, as top-down methods are expected to be more sensitive to IAV in the carbon cycle than NGHGI methods for individual years. Strong agreement is found between the NGHGI Energy+IPPU emissions and the fossil fuel emissions in Byrne et al. (2022), while larger differences are found between Agr+LULUCF+Waste and  $\Delta C_{\text{loss}}$ .  
660 Averaged over the 2015–2020 period, we obtain statistically significant differences between Agr+LULUCF+Waste and  $\Delta C_{\text{loss}}$  for the USA and EU27+UK for each experiment (based on student t-test at 0.05 significance level). In each case the top-down estimates suggest greater carbon sequestration by land, with mean differences of 0.59–0.91 Pg CO<sub>2</sub> yr<sup>-1</sup> for the USA and 0.99–1.79 Pg CO<sub>2</sub> yr<sup>-1</sup> for the EU27+UK. The reasons for these differences are unclear but are not expected to be explained by removals in unmanaged lands. It is possible that NGHGI methods miss or underestimate sink processes and/or that there are  
665 biases affecting the top-down estimates (see, Sect. 9 for remaining challenges in top-down estimates). We encourage further research and comparison between the NGHGI and top-down research communities to better understand the sources of these differences.

## 9 Discussion

Here we discuss the current limitations of top-down country-level CO<sub>2</sub> budgets and activities that can improve these estimates.  
670 Sect. 9.1 discusses current CO<sub>2</sub> observing systems and possible future expansions. Sect. 9.2 discusses current atmospheric CO<sub>2</sub> inversion systems, planned developments, and opportunities for improvement. Finally, Sect. 9.3 discusses remaining challenges in estimating carbon stock changes from atmospheric CO<sub>2</sub> inversions.

### 9.1 Observations

In the context of global inversion analyses, measurements of atmospheric CO<sub>2</sub> best inform annual-mean biosphere–atmosphere  
675 CO<sub>2</sub> fluxes over large spatial scales (e.g., continental-to-global) due to rapid mixing in the atmosphere and gaps in current measurement coverage. The confidence in these top-down estimates decreases as we move to smaller spatial scales, with the minimum spatial scale being dependent on the density, precision and sensitivity of the measurements. Future refinements in top-down CO<sub>2</sub> budgets will depend on increasing observational density (Sect. 9.1.1), improved validation (Sect. 9.1.2), and data harmonization (Sect. 9.1.3).

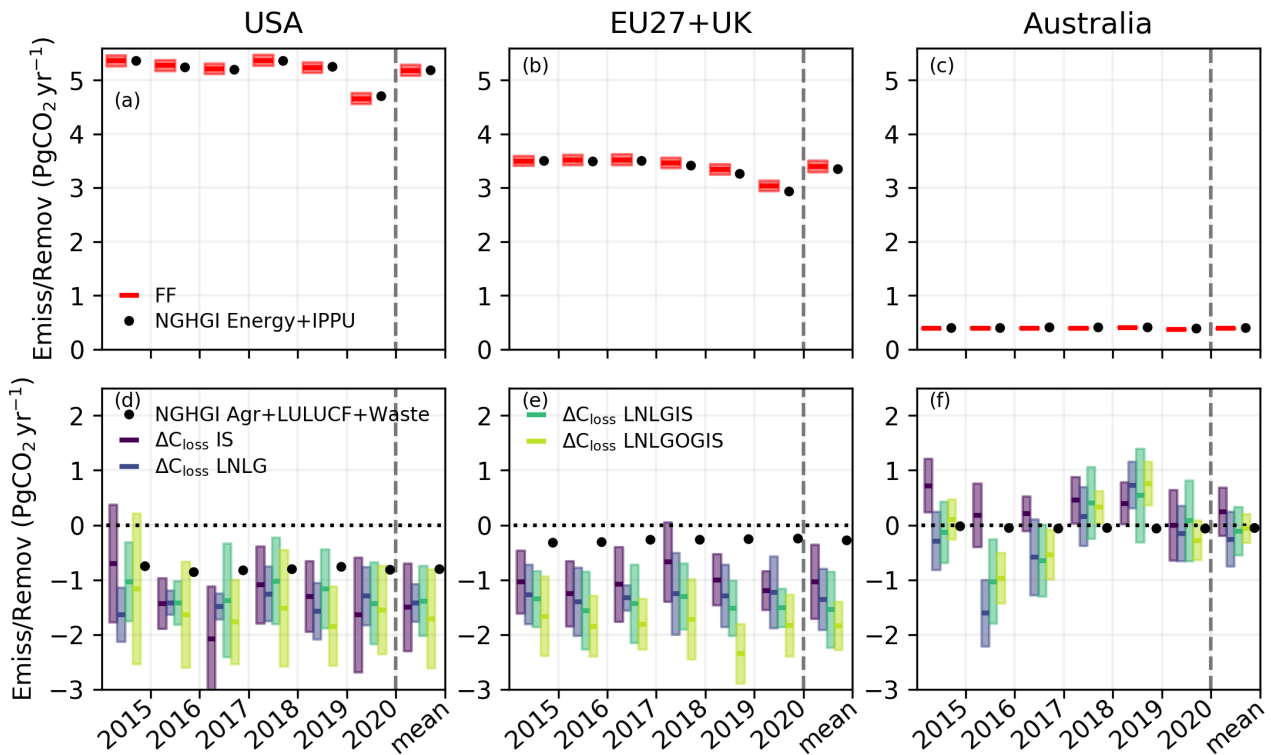

**Figure 15.** Emissions and removals of CO<sub>2</sub> from the (a-c) Energy and IPPU categories and (d-f) Agriculture, LULUCF and waste categories reported in NGHGs and  $\Delta C_{\text{loss}}$  for four OCO-2 MIP experiments (IS, LNLG, LNLGIS, LNLGOGIS). Values are provided for individual years and the 2015–2020 mean.

### 680 9.1.1 Expanding observations

An expanding network of CO<sub>2</sub> observing systems provides an opportunity to reduce uncertainties in top-down estimates of NCE. Across much of the globe, country-level estimates of NCE have been limited by the observational coverage of in situ CO<sub>2</sub> measurements and  $X_{\text{CO}_2}$  retrievals. However, there are a number of planned expansions in observing systems that will help fill data gaps.

685 The first-generation of space-based CO<sub>2</sub> systems currently in operation (GOSAT, GOSAT-2, OCO-2, OCO-3, TanSat) were designed primarily as proof-of-concept missions to demonstrate that space-based measurements could yield  $X_{\text{CO}_2}$  retrievals with the precision and accuracy required to quantify emissions and removals of CO<sub>2</sub>. Planned future missions will expand and improve upon current observing systems. MicroCarb, a France-UK mission, is expected to start operations in 2023 with an additional spectral band to better characterize the light path for the estimation of  $X_{\text{CO}_2}$  (Bertaux et al., 2020). Japan's  
 690 GOSAT-GW mission (<https://gosat-gw.nies.go.jp/en/>), which will be launched in early 2024, will also incorporate improved capabilities for CO<sub>2</sub> as well as CH<sub>4</sub>. Soon after, NASA plans to launch the GeoCarb mission (<https://www.ou.edu/geocarb>),

which will be hosted on a commercial communications satellite in geostationary orbit at a longitude around 85° W. From that vantage point, GeoCarb can return the data needed to estimate the column average dry air mole fraction of CO<sub>2</sub>, CH<sub>4</sub> and carbon monoxide (CO) over most of North and South America at a spatial resolution of 5 to 10 km every day. In 2025, the European Copernicus program will begin to deploy the first operational CO<sub>2</sub> and CH<sub>4</sub> monitoring constellation, CO2M (Pinty et al., 2017; Janssens-Maenhout et al., 2020). The CO2M constellation will eventually include up to three satellites, flying in formation to collect measurements at 2 km by 2 km resolution over the entire globe at weekly intervals. In addition, a follow-on to the Chinese TanSat mission is currently under development (Yang et al., 2018).

Most current and planned space-based CO<sub>2</sub> observing systems are passive, in that they rely on reflected sunlight to retrieve X<sub>CO<sub>2</sub></sub>. Active satellite missions, which use lidars for their light source, could provide coverage when reflected sunlight is not available or of insufficient intensity, such as at night and at high latitudes in the winter hemisphere when solar zenith angles are large. These systems also have the potential to better characterize systematic errors in current passive instruments by using pulse timing information to get a better estimate of path length and to filter out scattered light from clouds and aerosols (Abshire et al., 2010).

As space-based CO<sub>2</sub> observing systems expand, sub-orbital discrete air sampling (i.e., flask) and continuous CO<sub>2</sub> observing systems will remain critical for developing top-down CO<sub>2</sub> budgets. These in situ observations are the global standard for GHG measurements, because they can undergo direct calibration relative to the ~~WMO~~ [World Meteorological Organization \(WMO\)](#) CO<sub>2</sub>-in-air mole fraction scale, which is SI-traceable (Hall et al., 2021). In contrast, open-path remote sensing measurements (both TCCON and satellite) can not be calibrated using standard gasses; they can only be compared to in situ vertical profile observations made relative to the WMO scale, with the differences used to adjust the remote sensing observations (e.g., Wunch et al., 2011). As such, in situ data are critical for linking remote sensing observations of CO<sub>2</sub> to the accepted trace gas scales. In situ data also provide complementary observational coverage to space-based observing systems (Byrne et al., 2017). Space-based measurements have broad spatial coverage but with seasonal variations driven by sunlight, and have data gaps in persistently cloudy regions. In contrast, flask and in situ data can be deployed year-round and regardless of cloud cover. Additionally, in situ observations most typically represent the planetary boundary layer where flux signals in atmospheric CO<sub>2</sub> are larger than the signal as expressed in the column mean (Feng et al., 2019). Thus, these data play a critical role for improving carbon cycle constraints, especially in high latitude and persistently cloudy regions (such as the tropics), and we encourage an expansion of these systems in these undersampled regions. Regular measurements of CO<sub>2</sub> using light aircraft above several sites in Amazonia exist (e.g., Gatti et al., 2021; Miller et al., 2021), but these measurement records, as well as a nascent aircraft program in Uganda, have been so far funded using short-term grants.

Measurements of stable- (<sup>13</sup>C/<sup>12</sup>C) and radio- (<sup>14</sup>C/C) isotope ratios of carbon in CO<sub>2</sub> provide powerful tools for source attribution. Radiocarbon is absent from fossil fuels making it ideal for distinguishing fossil versus biologic carbon fluxes, and inversions using measurements of CO<sub>2</sub> and <sup>14</sup>C/C have been used to provide top-down constraints on national-scale fossil CO<sub>2</sub> emissions (Basu et al., 2020). Atmospheric <sup>13</sup>C/<sup>12</sup>C ratios provide insight into ecosystem stress and its relation to climate via constraint of ecosystem water use efficiency (photosynthesis relative to water loss by transpiration) and has been used in box models (Keeling et al., 2017) and inversions (Peters et al., 2018). Atmospheric <sup>13</sup>C/<sup>12</sup>C ratio data are generally available where

discrete air samples are collected by various networks, but  $^{14}\text{C}/\text{C}$  ratio data are more limited as they tend to require larger samples and measurement costs are greater. Other tracers closely related to  $\text{CO}_2$ , such as  $\text{O}_2/\text{N}_2$  (Keeling and Graven, 2021) and Carbonyl Sulphide (e.g., Hu et al., 2021; Remaud et al., 2022) are also limited yet provide valuable information on global ocean/NBE and regional-scale photosynthesis/respiration partitioning, respectively. Increasing the temporal and spatial density of these data, particularly across poorly sampled regions, will allow for more diagnostic power of carbon cycle processes than is possible with  $\text{CO}_2$  alone.

### 9.1.2 Data validation

Validation of  $X_{\text{CO}_2}$  retrievals is critical for ensuring that retrieval biases do not strongly impact flux estimates. Current gaps in coverage of ground-based and airborne measurements have limited our confidence in flux inferences from space-based data. For example, large  $\text{CO}_2$  emissions over northern Sub-Saharan Africa are a robust feature of the inversions that assimilate satellite  $X_{\text{CO}_2}$  retrievals (Palmer et al., 2019), but there are few independent  $\text{CO}_2$  measurements to confirm whether this inference is a real signal or an artifact of regional retrieval biases. Increased validation of space-based observations will also provide critical support for improved space-based inferences. Space-based measurements rely on validation against ground based  $X_{\text{CO}_2}$  retrievals from the TCCON (Wunch et al., 2011) and the COllaborative Carbon Column Observing Network (COCCON, Frey et al., 2019). In turn, these sites rely on in situ  $\text{CO}_2$  measurements from aircraft profiles and AirCore (Karion et al., 2010) to tie their measurements to the WMO scale (Wunch et al., 2010; Messerschmidt et al., 2011). These data have been critical for validating and improving  $X_{\text{CO}_2}$  retrievals (Wunch et al., 2017b; O'Dell et al., 2018; Kiel et al., 2019). Continued funding of these activities will be crucial for improving top-down  $\text{CO}_2$  flux estimates and expansion of these observing systems into undersampled regions, such as the tropics and high latitudes, will also be important for identifying and addressing residual  $X_{\text{CO}_2}$  retrieval biases. In addition, efforts to cross-calibrate TCCON and COCCON sites will be helpful for minimizing site-to-site biases and identifying spurious drifts in  $X_{\text{CO}_2}$ . We encourage future campaigns aimed at site-to-site comparisons similar to the FRM4GHG campaign that deployed total column GHG traveling standard instruments at several TCCON sites as part of ESA's FRM4GHG-2 project (Sha et al., 2020).

### 9.1.3 Data harmonization

Further advancements in top-down flux estimates will be possible through combining the observational constraints from the constellation space-based sensors and ground-based instruments. Assimilating these data concurrently within inversion systems will increase our ability to recover net fluxes over smaller regions. However, these instruments must be cross-calibrated against common standards to use these data together, as small inter-calibration differences could potentially strongly impact flux estimates. We encourage support of these critical cross-calibration activities, as are outlined in Crisp et al. (2018).



## 9.2 Atmospheric CO<sub>2</sub> inversions

Atmospheric CO<sub>2</sub> inversion analyses are a critical tool for estimating surface fluxes from observations of atmospheric CO<sub>2</sub>. Expanding observational coverage provides both opportunities and challenges for inversion systems. By addressing the current limitations of our inversion systems, we will be able to take full advantage of increasing observations to improve country-level top-down estimates of NCE and  $\Delta C_{\text{loss}}$ . Here we discuss ongoing and planned developments (Sect. 9.2.1), improving model transport (Sect. 9.2.2), missing processes and required assumptions (Sect. 9.2.3), and uncertainty quantification (Sect. 9.2.4).

### 9.2.1 Ongoing and planned developments

To date, there are four operational or quasi-operational atmospheric CO<sub>2</sub> inversion systems: CarbonTracker (Jacobson et al., 2020), CAMS (Chevallier et al., 2005b), Jena CarboScope (Rödenbeck et al., 2018) and CMS-Flux (Liu et al., 2021a) that are regularly updated on annual or quarterly timescales. These systems produce NBE and air-sea flux estimates from either in situ CO<sub>2</sub> measurements (CarbonTracker, Jena CarboScope), OCO-2 X<sub>CO<sub>2</sub></sub> retrievals (CMS-Flux) or both (CAMS). Similarly, there are seven inversion models (including the aforementioned models) that update CO<sub>2</sub> flux estimates annually for the Global Carbon Budget (Friedlingstein et al., 2022), including CAMS (Chevallier et al., 2005b), CarbonTracker Europe (CTE van der Laan-Luijkx et al., 2017), Jena CarboScope (Rödenbeck et al., 2018), UoE in situ (Feng et al., 2016), NISMON-CO2 (Niwa et al., 2017), MIROC4-ACTM (Saeki and Patra, 2017; Chandra et al., 2021), and CMS-Flux (Liu et al., 2021a).

The OCO-2 MIP activities have semi-regularly performed ensemble inversion experiments (Crowell et al., 2019; Peiro et al., 2022). To date, OCO-2 MIP experiments have been linked to new versions of the ACOS retrieval algorithm, with major improvements to the quality of X<sub>CO<sub>2</sub></sub> retrievals occurring during each update. However, as the quality of retrievals have improved (particularly for ACOS v10 onwards), updates to the ACOS retrieval algorithm are becoming less of a driver for new OCO-2 MIP experiments. In the future, OCO-2 MIP activities could become more regular with annual updates.

The first top-down CO<sub>2</sub> system for use in inventory development is CarbonWatch-NZ, under development in New Zealand (<https://niwa.co.nz/climate/research-projects/carbon-watch-nz>). This program includes expanded CO<sub>2</sub> measurement sites and the development of a regional atmospheric CO<sub>2</sub> inverse system to quantify the carbon budgets of New Zealand's forest, grassland and urban environments. Initial results suggest stronger uptake by intact forests than estimated through bottom-up estimates (Steinkamp et al., 2017). This system may serve as an example for other nations through the Integrated Global Greenhouse Gas GHG Information System (IG3IS) framework.

Beyond existing activities, there are a number of planned projects. The European Commission's Copernicus program (<https://www.copernicus.eu>) has a number of developments ongoing and planned, particularly in building anthropogenic CO<sub>2</sub> emissions monitoring and verification support capacity (CO2MVS; Janssens-Maenhout et al., 2020), which is directly linked to the development and launch of the new CO2M mission and is expected to be operational from 2026 onwards. Further, there are a number of recently completed, ongoing, and planned projects to develop and improve inversion systems to develop operational capacity. Examples include the recently completed CO<sub>2</sub> Human Emissions (CHE) project (<https://www.che-project.eu/>) and follow-up CoCO2 project (<https://coco2-project.eu/>) that is ongoing, as-well as the VERIFY project (<https://verify.lsce.ipsl.fr/>).

790 These projects are developing and refining inversion systems to estimate anthropogenic fossil fuel emissions as well as emissions and removals from the [AFOLU sector agriculture, LULUCF, and waste categories](#). Future planned projects include developing approaches to utilize co-emitted species and auxiliary observations ( $^{14}\text{C}$ , solar induced fluorescence, Carbonyl Sulfide, and others) in order to isolate some of the  $\text{CO}_2$  budget components and improve our understanding of the carbon cycle. For example, multiple data streams could be used together to optimize the dynamic global vegetation model parameters (e.g., Peylin et al., 2016).

795 In contrast to recent European efforts, there is no mandate for an operational top-down carbon flux-attribution system in the US. Nevertheless, efforts at NOAA centered around CarbonTracker (Jacobson et al., 2020) have been able to produce NBE estimates with relatively low latency harnessing the Agency's substantial flask and in situ  $\text{CO}_2$  network. In addition, NOAA has developed a higher spatial resolution North American regional inverse system, CarbonTracker-Lagrange (<https://gml.noaa.gov/ccgg/carbontracker-lagrange/>; Hu et al., 2019). In anticipation of the launch of OCO in 2009, NASA has supported research and development efforts needed to prototype an operational flux estimation system. In particular, the Carbon  
800 Monitoring System program (<https://carbon.nasa.gov/>) has led to the development of both low-latency (2 month) atmospheric  $\text{CO}_2$  reanalysis (Weir et al., 2021) and approaches to combine top-down NCE estimates with other trace gas measurements (e.g., CO) and non-atmospheric carbon data (e.g., above-ground biomass) to provide improved understanding of carbon cycle processes (Liu et al., 2017; Byrne et al., 2020, 2021; Bloom et al., 2020). There is substantial technical capacity to build an  
805 operational system but requires a coordinated effort between federal agencies, academia, and private interests.

In Canada, a prototype operational regional inverse modeling system, the Environment and Climate Change Canada (ECCC) National Carbon Flux Inversion System (ENCIS), is being developed to provide quantitative information on  $\text{CO}_2$  (and  $\text{CH}_4$ ) flux estimates over Canada from national to provincial scales, as well as to understand the carbon cycle in Canada such as  $\text{CO}_2$  flux in boreal managed and unmanaged forests, wetland emissions of  $\text{CH}_4$ , and GHG emissions over a potentially thawing  
810 permafrost in response to the climate change. ENCIS is a regional inverse modeling system based on Lagrangian approach and driven by metrology from the Global Environmental Multiscale (GEM) model (Girard et al., 2014) and is expected to have  $1^\circ \times 1^\circ$  spatial resolution.

Finally, there are ongoing internationally organized activities. Phase 2 of the Regional Carbon Cycle Assessment and Processes project (RECCAP-2), coordinated by the Global Carbon Project (<https://www.globalcarbonproject.org/reccap/>), has  
815 aimed to characterize regional carbon budgets. This included investigating how different data sources – including atmospheric inversion analyses – can contribute to this goal (Bastos et al., 2022; Deng et al., 2022). In addition, the WMO has hosted workshops and symposiums with the GHG monitoring community to develop a framework for sustained, internationally coordinated global GHG monitoring (e.g., <https://community.wmo.int/meetings/wmo-international-greenhouse-gas-monitoring-symposium>

## 820 9.2.2 Improving CTM transport

Errors in the representation of atmospheric transport by CTMs has long been recognized as a major source of error in atmosphere  $\text{CO}_2$  inversion analyses (Law et al., 1996; Law and Simmonds, 1996; Denning et al., 1995, 1999a, b; Baker et al.,

2006a; Stephens et al., 2007). Improvements to model transport will provide critical improvements to NCE and  $\Delta C_{\text{loss}}$  estimates. Systematic errors in model transport limit our ability to relate surface fluxes and CO<sub>2</sub> observations, and can lead to incorrect inferences of surface fluxes (Yu et al., 2018; Schuh et al., 2019; Stanevich et al., 2020). Improving model transport will require work in two areas: (1) improving model parameterizations of unresolved transport, particularly in coarse off-line CTMs (like GEOS-Chem run at  $4^\circ \times 5^\circ$  in this ensemble) where the spatial and temporal coarsening of meteorological fields can “average-out” vertical transport that is resolved in the parent model (Yu et al., 2018; Stanevich et al., 2020); and (2) increasing spatial and temporal resolution in model simulations, which can better resolve atmospheric transport processes (Agustí-Panareda et al., 2019; Schuh et al., 2019). However, it should be noted that there are limitations to the improvements that can come from increased model resolution in the global inversion context due to underlying meteorological uncertainties (Liu et al., 2011; Polavarapu et al., 2016, 2018; McNorton et al., 2020). Computational cost is also a significant challenge in inversion systems, because transport models usually scale poorly on supercomputers, for example because of the volume of meteorological data required as input.

As transport models are refined, it will be critical to periodically test their ability to represent large scale atmospheric dynamics. This can be tested using long-lived trace gas species, including sulfur hexafluoride (Schuh et al., 2019), idealized age of air tracer (Krol et al., 2018), and beryllium-7 (Stanevich et al., 2020). Simulations of these trace species are critical in the context of inversion MIPs to gauge inter-model variability and average model bias (Schuh et al., 2019). Similarly, Rn 222 is a useful short lived gas species that enables modelers to evaluate the vertical mixing within the column (Remaud et al., 2018). In addition, model intercomparison studies have proven useful for diagnosing transport errors (e.g., Gaubert et al., 2019; Zhang et al., 2022), and we recommend further activities, such as within the Atmospheric Tracer Transport Model Intercomparison Project (TRANSCOM) framework.

### 9.2.3 Missing processes and required assumptions

The flux estimates provided here do not explicitly account for the atmospheric-chemical production of atmospheric CO<sub>2</sub>, which occurs from the oxidation of reduced carbon gasses. Instead, these fluxes are either prescribed as surface-atmosphere fluxes (e.g., for FF CO emissions) or neglected from the prior fluxes. This can cause inverse modeling systems to implicitly incorporate the atmospheric CO<sub>2</sub> source in optimized surface-atmosphere emissions and removals (i.e. air-sea fluxes and NBE), which can be far from the actual source of the reduced gas. For example, FF CO emissions are largely emitted in the northern extratropics but largely oxidized to CO<sub>2</sub> in the tropical troposphere. These incorrectly located emissions of CO<sub>2</sub> are large enough to impact top-down inversions (Enting and Mansbridge, 1991; Suntharalingam et al., 2005; Nassar et al., 2010; Wang et al., 2020). Future studies that aim to incorporate an atmospheric source of CO<sub>2</sub> would help correct for this current spatial bias (Ciais et al., 2022).

A critical assumption in the top-down CO<sub>2</sub> budgets estimated here has been that FF emissions are known and unbiased. Uncertainties in inventory-based FF emission estimates at global and country levels (e.g., Andres et al., 2014) are smaller than top-down NCE estimates; however, inventory-based emission estimates are prone to systematic biases due to the nature of the estimation approach (Guan et al., 2012; Oda et al., 2019) and FF uncertainties could bias the partitioning of NCE between FF

and NBE (and propagate into  $\Delta C_{\text{loss}}$ ) over countries with large emissions and lower reliability of statistical data collection system, such as China. For example, Saeki and Patra (2017) show that an inferred increase in removals of CO<sub>2</sub> by the biosphere over China during 2001–2010 are likely to be an artifact imposed by an error in the trend of anthropogenic CO<sub>2</sub> emissions.

#### 860 **9.2.4 Uncertainty quantification**

The uncertainty in NCE reported here is an estimate of the standard deviation of the v10 OCO-2 MIP ensemble members. This is meant to characterize uncertainties originating from the inversion configuration (such as the transport model, inversion method, and prior constraints). However, there are also limitations to this method. First, there is only a small ensemble of 11 MIP ensemble members included in this analysis, and an over-representation of inversions using two transport models: 865 TM5 (3) and GEOS-Chem (5), which makes uncertainty quantification challenging. Future approaches that employ “borrowing strength” (Mearns and et al., 2007; Cressie and Kang, 2016) could be employed to better characterize ensemble uncertainty. Second, the ensemble-based uncertainty estimate does not capture some sources of uncertainty. In particular, Bayesian posterior uncertainties are not considered here (see Sect. 5.2), due to the fact that many of the inversion systems participating in the v10 OCO-2 MIP do not calculate this uncertainty. In addition, we find that the ensemble members that produce Bayesian 870 uncertainties show large differences in magnitude. Thus, this is an area of future improvement for MIP activities, and we recommend more work into characterizing this error component in ensemble inversion experiments. We also note that using an analytic framework, posterior uncertainties and their sensitivities to prior information could be further examined, as has been done for methane (Worden et al., 2022).

### **9.3 Stockchange estimates**

875 AFOLU Agriculture and LULUCF emissions and removals are generally quantified as terrestrial carbon stockchanges in managed lands. A number of challenges remain in estimating this quantity from top-down methods. Firstly, lateral fluxes of carbon remain quite uncertain (and associated uncertainty estimates are themselves quite uncertain). The best constrained lateral fluxes are annual country-level  $F_{\text{wood trade}}$  and  $F_{\text{wood trade}}$ , which are reported to the UN Food and Agriculture Organization. These fluxes are more uncertain on sub-national scales and sub-annual timescales. Meanwhile,  $F_{\text{rivers export}}$  is best quantified on 880 basin scales, where stream gauge measurements inform carbon fluxes. Improving sub-national and sub-annual estimates of lateral fluxes would have several benefits: first, this would allow for better sub-national attribution, where regional fluxes could be better quantified. Second, this would allow for incorporating the atmospheric imprint of these carbon fluxes as prior information within atmospheric CO<sub>2</sub> inversion analyses, which may improve flux estimates on sub-national scales.

The Global Stocktake GST and Paris Agreement do not consider emissions and removals from unmanaged lands. Separating 885 managed lands from unmanaged lands is top-down NCE remains a major challenge, given the smoothed large-scale CO<sub>2</sub> flux constraints provided by these top-down methods and the fact that both managed and unmanaged lands can experience considerable stock changes driven by interannual climate variations (e.g., El Niño) and in response to rising CO<sub>2</sub> and climate change. In addition, separating managed and unmanaged lands is further complicated by the fact that there is considerable ambiguity

in the definitions managed lands, which can also vary by country (Grassi et al., 2018; Chevallier, 2021). We recommend that  
890 each party provide a mask to unambiguously define the plots considered as managed from year to year (Chevallier, 2021).

## 10 Conclusions

We introduced a pilot top-down CO<sub>2</sub> budget dataset (Byrne et al., 2022) intended to start a dialogue between research com-  
munities and to identify ways that top-down flux estimates can inform country-level carbon budgets. This dataset provides  
annual country-level and 1° × 1° gridded top-down NCE and  $\Delta C_{\text{loss}}$  over 2015–2020, in addition to bottom-up FF and lateral  
895 fluxes. These data are provided for four experiments from the v10 OCO-2 MIP that differ in the data used in the assimilation:  
IS, LNLG, LNLGIS, and LNLGOGIS. In addition, we provide two metrics for interpreting country-level estimates: (1) the  
Z-statistic (Sect. 5.1), which quantifies the agreement between IS and LNLG NCE estimates, and (2) the FUR (Sect. 5.2),  
which quantifies the impact of atmospheric CO<sub>2</sub> data in reducing flux uncertainties.

Country-level flux estimates generally show robust signals for large extratropical countries (e.g., USA, Russia, China).  
900 Agreement between the experiments generally decreases for mid-sized countries (e.g., Turkey), particularly in regions with  
sparse observational coverage for the in situ network (such as the tropics). Large divergences between the IS and LNLG  
experiments occur in some regions, particularly northern Sub-Saharan Africa, and could be related to the sparsity of in situ  
CO<sub>2</sub> measurements or biases in OCO-2 retrievals. However, the sparsity of independent CO<sub>2</sub> measurements in these regions  
precludes definitive conclusions. We urge caution in interpreting the 1° × 1° gridded results and suggest collaborating with  
905 with experts in atmospheric CO<sub>2</sub> inversion systems when using those data.

The accuracy of top-down NCE estimates were characterized through comparisons against independent atmospheric CO<sub>2</sub>  
datasets, and through comparisons against pCO<sub>2</sub>-based air–sea CO<sub>2</sub> fluxes. Overall, the IS, LNLG, and LNLGIS were found  
to show the best agreement against independent CO<sub>2</sub> measurements, and we recommend using these experiments for analysis.  
Poorer agreement for experiments assimilating OCO-2 ocean glint X<sub>CO<sub>2</sub></sub> retrievals, suggesting that residual retrieval biases  
910 adversely impact the LNLGOGIS experiment and we urge caution in interpreting these data.

For future GSTs, top-down NCE estimates will be refined as new space-based X<sub>CO<sub>2</sub></sub> observing systems expand and retrieval  
algorithms are improved. Complementary expansions of ground-based and aircraft-based CO<sub>2</sub> measurements in under-sampled  
regions will similarly fill critical observational gaps in regions with large uncertainties and susceptibility to retrieval biases.  
Improvements to atmospheric CO<sub>2</sub> inversion systems, including reductions to systematic transport errors and improved error  
915 characterization, will be critical for refining top-down CO<sub>2</sub> budgets. And improved estimates of lateral carbon fluxes and  
managed lands maps will refine estimates of AFOLU agriculture, LULUCF, and waste emissions and removals.

## 11 Data availability

Top-down CO<sub>2</sub> budgets (Byrne et al., 2022) are available from the Committee on Earth Observation Satellites' (CEOS) website:  
<https://doi.org/10.48588/npf6-sw92>. Gridded NBE and air-sea fluxes from the OCO-2 MIP are available at

920 [https://gml.noaa.gov/ccgg/OCO2\\_v10mip/](https://gml.noaa.gov/ccgg/OCO2_v10mip/). Fossil fuel emissions prescribed in the inversions can be downloaded from <https://zenodo.org/record/4776925#.YNX96hNKj2U>. The ODIAC2020 emission data product can be downloaded from the Global Environmental Database hosted by the Center for Global Global Environmental Research at NIES ([https://db.cger.nies.go.jp/dataset/ODIAC/DL\\_odiad2020.html](https://db.cger.nies.go.jp/dataset/ODIAC/DL_odiad2020.html)). SeaFlux pCO<sub>2</sub>-based air-sea fluxes were downloaded from <https://zenodo.org/record/5482547#.Yowg18ZiD1I>, accessed 23 May 2022.

**Table A1.** TCCON sites used for evaluation of posterior CO<sub>2</sub> fields of the v10 OCO-2 MIP experiments.

| TCCON site       | Country     | Latitude | Longitude | Reference                      |
|------------------|-------------|----------|-----------|--------------------------------|
| Eureka           | Canada      | 80.05° N | 86.42 °W  | Strong et al. (2019)           |
| Ny-Ålesund       | Norway      | 78.9° N  | 11.9 °E   | Notholt et al. (2019b)         |
| Sodankylä        | Finland     | 67.4° N  | 26.6 °E   | Kivi et al. (2014)             |
| East Trout Lake  | Canada      | 54.4° N  | 105.0 °W  | Wunch et al. (2017a)           |
| Bremen           | Germany     | 53.10° N | 8.85 °E   | Notholt et al. (2019a)         |
| Karlsruhe        | Germany     | 49.1° N  | 8.4 °E    | Hase et al. (2014)             |
| Paris            | France      | 48.8° N  | 2.4 °E    | Te et al. (2014)               |
| Orléans          | France      | 47.9° N  | 2.1 °E    | Warneke et al. (2019)          |
| Garmisch         | Germany     | 47.5° N  | 11.1 °E   | Sussmann and Rettinger (2018a) |
| Zugspitze        | Germany     | 47.3° N  | 11.0 °E   | Sussmann and Rettinger (2018b) |
| Park Falls       | USA         | 45.9° N  | 90.3 °W   | Wennberg et al. (2017)         |
| Rikubetsu        | Japan       | 43.5° N  | 143.8 °E  | Morino et al. (2014)           |
| Lamont           | USA         | 36.6° N  | 97.5 °W   | Wennberg et al. (2016b)        |
| Anmeyondo        | Korea       | 36.5° N  | 126.3 °E  | Goo et al. (2014)              |
| Tsukuba          | Japan       | 36.1° N  | 140.1 °E  | Morino et al. (2018a)          |
| Nicosia          | Cyprus      | 35.1° N  | 33.4 °E   | Petri et al. (2020)            |
| Edwards          | USA         | 34.2° N  | 118.2 °W  | Iraci et al. (2016)            |
| JPL              | USA         | 34.2° N  | 118.2 °W  | Wennberg et al. (2016a)        |
| Caltech          | USA         | 34.1° N  | 118.1 °W  | Wennberg et al. (2014)         |
| Saga             | Japan       | 33.2° N  | 130.3 °E  | Kawakami et al. (2014)         |
| Hefei            | China       | 31.9° N  | 117.2 °E  | Liu et al. (2018)              |
| Izaña            | Spain       | 28.3° N  | 16.5 °W   | Blumenstock et al. (2017)      |
| Burgos           | Philippines | 18.5° N  | 120.7 °E  | Morino et al. (2018b)          |
| Manaus           | Brazil      | 3.2° N   | 60.6 °W   | Dubey et al. (2014)            |
| Ascension Island | UK          | 7.9° S   | 14.3 °W   | Feist et al. (2014)            |
| Darwin           | Australia   | 12.4° S  | 130.9 °E  | Griffith et al. (2014a);       |
| Réunion island   | France      | 20.9° S  | 55.5 °W   | De Mazière et al. (2017)       |
| Wollongong       | Australia   | 34.4° S  | 150.9 °E  | Griffith et al. (2014b)        |
| Lauder 125HR     | New Zealand | 45.0° S  | 169.7 °E  | Sherlock et al. (2014)         |

*Author contributions.* The study was conceived of by DC, and designed by BB, DB, SB, KWB, AC, FC, PC, NC, DC, LH, ARJ, JL, JBM, TO, PKP, BP, AS, CS, and JRW. The v10 OCO-2 MIP experiments were performed by DFB, SB, MB, FC, NC, SC, FD, ARJ, RJ, MSJ, DBAJ, JL, ZL, SM, SMM, RM, AS, AZM, and NZ. Lateral flux estimates were performed by FC, PC, ZD, HT, and YY. FF emissions estimates were performed by TO and SB. TCCON data were collected by NMD, MKD, OEG, BH, RK, IM, JN, YSO, HO, CP, KS, KS, YT, VAV, MV, TW and DW. Evaluation of v10 OCO-2 MIP against co-samples was performed by BB, SB, AC, and ARJ. BB wrote the paper and prepared the figures, with contributions from all co-authors.

*Competing interests.* no competing interests are present

*Acknowledgements.* Part of this research was carried out at the Jet Propulsion Laboratory, California Institute of Technology, under a contract with the National Aeronautics and Space Administration (80NM0018D004). The v10 OCO-2 MIP activity was supported by the NASA OCO Science Team program. BB and JL were supported by the NASA OCO2/3 science team program NNH17ZDA001N-OCO2. ARJ, AS, and DFB were funded by NASA award 80NSSC21K1080. AS was also supported by the NASA grant NNX15AG93G. SC acknowledge from the NASA OCO Science Team grant 80NSSC21K1077. The research of NC, AZM, and MB was supported by Australian Research Council Discovery Project DP190100180 and by NASA ROSES grant 20-OCOST20-0004. AZM is also supported by the Australian Research Council Discovery Early Career Research Award DE180100203. Contribution of AC was supported by NASA ROSES Grant numbers 80NSSC20K0006 and 80NSSC21K1068. MSJ acknowledges the internal funding from NASA's Earth Science Research and Analysis Program. The contributions of FC and MR were supported by the Copernicus Atmosphere Monitoring Service, implemented by the European Centre for Medium-Range Weather Forecasts on behalf of the European Commission (grant no. CAMS73), and by the European Union's Horizon 2020 research and innovation programme under grant agreement No 958927 (Prototype system for a Copernicus CO2 service). It was granted access to the HPC resources of TGCC under the allocation A0110102201 made by GENCI. SF at PNNL is supported by the NASA Carbon Monitoring Program (Grant number: 80HQTR21T0069). The Pacific Northwest National Laboratory is operated by Battelle Memorial Institute under contract DE-AC05-76RL01830. NZ acknowledges support from NOAA (NA18OAR4310266) and NASA (80NSSC18K0908). PKP is partly supported by Environment Research and Technology Development Fund (JPMEERF21S20800) of the Environmental Restoration and Conservation Agency of Japan. SMM was supported by the NASA grants 80NSSC18K0976 and 80NSSC21K1073. NMD was funded by ARC Future Fellowship FT180100327

The TCCON Nicosia site has received additional support from the European Union's Horizon 2020 research and innovation programme (grant agreement No. 856612 /EMME-CARE), the Cyprus Government, and the University of Bremen. The TCCON Anmyeondo site has been funded by the Korea Meteorological Administration Research and Development Program "Developing Technology for Integrated Climate Change Monitoring and Analysis" under grant(KMA2018-00320). TCCON sites at Tsukuba, Rikubetsu and Burgos are supported in part by the GOSAT series project. Burgos is supported in part by the Energy Development Corp. Philippines. The Eureka TCCON measurements were made at the Polar Environment Atmospheric Research Laboratory (PEARL) by the Canadian Network for the Detection of Atmospheric Change (CANDAC), primarily supported by the Natural Sciences and Engineering Research Council of Canada, Environment and Climate Change Canada, and the Canadian Space Agency. The TCCON site at Réunion Island has been operated by the Royal Belgian Institute for Space Aeronomy with financial support since 2014 by the EU project ICOS-Inwire and the ministerial decree for ICOS (FR/35/IC1 to FR/35/C6) and local activities supported by LACy/UMR8105 and by OSU-R/UMS3365 – Université de La Réunion. Darwin



960 and Wollongong TCCON stations are supported by ARC grants DP160100598, LE0668470, DP140101552, DP110103118 and DP0879468 and NASA grants NAG512247 and NNG05GD07G.

We thank Robert J. Andres for providing uncertainty estimates for CDIAC fossil fuel emission estimates. We thank the data providers of the SeaFlux ensemble for making their pCO<sub>2</sub>-based air–sea CO<sub>2</sub> fluxes publicly available. We are grateful for the leadership of Annemarie Eldering and Mike Gunson of the OCO-2 mission, whose hard work has made this dataset possible.

- Abshire, J. B., Riris, H., Allan, G. R., Weaver, C. J., Mao, J., Sun, X., Hasselbrack, W. E., Kawa, S. R., and Biraud, S.: Pulsed airborne lidar measurements of atmospheric CO<sub>2</sub> column absorption, *Tellus B*, 62, 770–783, <https://doi.org/10.1111/j.1600-0889.2010.00502.x>, 2010.
- Agustí-Panareda, A., Diamantakis, M., Massart, S., Chevallier, F., Muñoz Sabater, J., Barré, J., Curcoll, R., Engelen, R., Langerock, B., Law, R. M., Loh, Z., Morguí, J. A., Parrington, M., Peuch, V.-H., Ramonet, M., Roehl, C., Vermeulen, A. T., Warneke, T., and Wunch, D.: Modelling CO<sub>2</sub> weather – why horizontal resolution matters, *Atmos. Chem. Phys.*, 19, 7347–7376, <https://doi.org/10.5194/acp-19-7347-2019>, 2019.
- Anav, A., Friedlingstein, P., Beer, C., Ciais, P., Harper, A., Jones, C., Murray-Tortarolo, G., Papale, D., Parazoo, N. C., Peylin, P., Piao, S., Sitch, S., Nicolas, V., Andy, W., and Zhao, M.: Spatiotemporal patterns of terrestrial gross primary production: A review, *Rev. Geophys.*, 53, 785–818, <https://doi.org/10.1002/2015RG000483>, 2015.
- Andres, R. J., Boden, T. A., and Higdon, D.: A new evaluation of the uncertainty associated with CDIAC estimates of fossil fuel carbon dioxide emission, *Tellus B*, 66, 23 616, <https://doi.org/10.3402/tellusb.v66.23616>, 2014.
- Andrew, R. M.: A comparison of estimates of global carbon dioxide emissions from fossil carbon sources, *Earth System Science Data*, 12, 1437–1465, <https://doi.org/10.5194/essd-12-1437-2020>, 2020.
- Baier, B., Sweeney, C., Tans, P., Newberger, T., Higgs, J., and Wolter, S.: NOAA AirCore atmospheric sampling system profiles (Version 20210813), <https://doi.org/https://doi.org/10.15138/6AV0-MY81>, 2021.
- Baker, D., Law, R. M., Gurney, K. R., Rayner, P., Peylin, P., Denning, A., Bousquet, P., Bruhwiler, L., Chen, Y.-H., Ciais, P., et al.: TransCom 3 inversion intercomparison: Impact of transport model errors on the interannual variability of regional CO<sub>2</sub> fluxes, 1988–2003, *Global Biogeochem. Cy.*, 20, <https://doi.org/10.1029/2004GB002439>, 2006a.
- Baker, D., Bösch, H., Doney, S., O’Brien, D., and Schimel, D.: Carbon source/sink information provided by column CO<sub>2</sub> measurements from the Orbiting Carbon Observatory, *Atmos. Chem. Phys.*, 10, 4145–4165, <https://doi.org/10.5194/acp-10-4145-2010>, 2010.
- Baker, D. F., Doney, S. C., and Schimel, D. S.: Variational data assimilation for atmospheric CO<sub>2</sub>, *Tellus B*, 58, 359–365, <https://doi.org/10.5194/acp-10-4145-2010>, 2006b.
- Baker, D. F., Bell, E., Davis, K. J., Campbell, J. F., Lin, B., and Dobler, J.: A new exponentially decaying error correlation model for assimilating OCO-2 column-average CO<sub>2</sub> data using a length scale computed from airborne lidar measurements, *Geosci. Model Dev.*, 15, 649–668, <https://doi.org/10.5194/gmd-15-649-2022>, 2022.
- Ballantyne, A. P., Alden, C. B., Miller, J. B., Tans, P. P., and White, J.: Increase in observed net carbon dioxide uptake by land and oceans during the past 50 years, *Nature*, 488, 70–72, <https://doi.org/10.1038/nature11299>, 2012.
- Bastos, A., Ciais, P., Sitch, S., Aragão, L. E., Chevallier, F., Fawcett, D., Rosan, T. M., Saunois, M., Günther, D., Perugini, L., et al.: On the use of Earth Observation to support estimates of national greenhouse gas emissions and sinks for the Global stocktake process: lessons learned from ESA-CCI RECCAP2, *Carbon balance and management*, 17, 1–16, 2022.
- Basu, S., Lehman, S. J., Miller, J. B., Andrews, A. E., Sweeney, C., Gurney, K. R., Xu, X., Southon, J., and Tans, P. P.: Estimating US fossil fuel CO<sub>2</sub> emissions from measurements of <sup>14</sup>C in atmospheric CO<sub>2</sub>, *Proceedings of the National Academy of Sciences*, 117, 13 300–13 307, <https://doi.org/10.1073/pnas.1919032117>, 2020.

- 1000 Bertaux, J.-L., Hauchecorne, A., Lefèvre, F., Bréon, F.-M., Blanot, L., Jouget, D., Lafrique, P., and Akaev, P.: The use of the 1.27  $\mu\text{m}$   $\text{O}_2$  absorption band for greenhouse gas monitoring from space and application to MicroCarb, *Atmos. Meas. Tech.*, 13, 3329–3374, <https://doi.org/10.5194/amt-13-3329-2020>, 2020.
- Bloom, A. A., Bowman, K. W., Liu, J., Konings, A. G., Worden, J. R., Parazoo, N. C., Meyer, V., Reager, J. T., Worden, H. M., Jiang, Z., Quetin, G. R., Smallman, T. L., Exbrayat, J.-F., Yin, Y., Saatchi, S. S., Williams, M., and Schimel, D. S.: Lagged effects regulate the inter-annual variability of the tropical carbon balance, *Biogeosciences*, 17, 6393–6422, <https://doi.org/10.5194/bg-17-6393-2020>, 2020.
- 1005 Blumenstock, T., Hase, F., Schneider, M., García, O. E., and Sepúlveda, E.: TCCON data from Izana (ES), Release GGG2014.R1, <https://doi.org/10.14291/TCCON.GGG2014.IZANA01.R1>, 2017.
- Bolin, B. and Keeling, C.: Large-scale atmospheric mixing as deduced from the seasonal and meridional variations of carbon dioxide, *J. Geophys. Res.*, 68, 3899–3920, <https://doi.org/10.1029/JZ068i013p03899>, 1963.
- 1010 Bureau Of Meteorology: Annual climate statement 2016, <http://www.bom.gov.au/climate/current/annual/aus/2016>, accessed: 10 June 2022, 2017.
- Byrne, B., Jones, D. B. A., Strong, K., Zeng, Z.-C., Deng, F., and Liu, J.: Sensitivity of  $\text{CO}_2$  Surface Flux Constraints to Observational Coverage, *J. Geophys. Res.-Atmos*, 112, 6672–6694, <https://doi.org/10.1002/2016JD026164>, 2017.
- Byrne, B., Liu, J., Bloom, A. A., Bowman, K. W., Butterfield, Z., Joiner, J., Keenan, T. F., Keppel-Aleks, G., Parazoo, N. C., and Yin, Y.: Contrasting regional carbon cycle responses to seasonal climate anomalies across the east-west divide of temperate North America, *Global Biogeochem. Cy.*, 34, e2020GB006598, <https://doi.org/10.1029/2020GB006598>, 2020.
- 1015 Byrne, B., Liu, J., Lee, M., Yin, Y., Bowman, K. W., Miyazaki, K., Norton, A. J., Joiner, J., Pollard, D. F., Griffith, D. W., Velazco, V. A., Deutscher, N. M., Jones, N. B., and Paton-Walsh, C.: The carbon cycle of southeast Australia during 2019–2020: Drought, fires, and subsequent recovery, *AGU Advances*, 2, e2021AV000469, <https://doi.org/10.1029/2021AV000469>, 2021.
- 1020 Byrne, B., Baker, D. F., Basu, S., Bertolacci, M., Bowman, K. W., Carroll, D., Chatterjee, A., Chevallier, F., Ciais, P., Cressie, N., Crisp, D., Crowell, S., Deng, F., Deng, Z., Deutscher, N. M., Dubey, M. K., Feng, S., García, O. E., Herkommer, B., Hu, L., Jacobson, A. R., Janardanan, R., Jeong, S., Johnson, M. S., Jones, D. B. A., Kivi, R., Liu, J., Liu, Z., Maksyutov, S., Miller, J. B., Miller, S. M., Morino, I., Notholt, J., Oda, T., O'Dell, C. W., Oh, Y.-S., Ohyama, H., Patra, P. K., Peiro, H., Petri, C., Philip, S., Pollard, D. F., Poulter, B., Remaud, M., Schuh, A., Sha, M. K., Shiomi, K., Strong, K., Sweeney, C., Té, Y., Tian, H., Velazco, V. A., Vrekoussis, M., Warneke, T., Worden, J. R., Wunch, D., Yao, Y., Yun, J., Zammit-Mangion, A., and Zeng, N.: Pilot top-down  $\text{CO}_2$  Budget constrained by the v10 OCO-2 MIP Version 1, Committee on Earth Observing Satellites, <https://doi.org/10.48588/npf6-sw92>, Version 1.0, 2022.
- 1025 Canadell, J. G., Monteiro, P. M., Costa, M. H., Da Cunha, L. C., Cox, P. M., Alexey, V., Henson, S., Ishii, M., Jaccard, S., Koven, C., Lohila, A., Patra, P. K., Piao, S., Rogelj, J., Syampungani, S., Zaehle, S., and Zickfeld, K.: Global Carbon and other Biogeochemical Cycles and Feedbacks, pp. 673–816, Cambridge University Press, Cambridge, United Kingdom and New York, NY, USA, <https://doi.org/10.1017/9781009157896.007>, 2021.
- 1030 Caspersen, J. P., Pacala, S. W., Jenkins, J. C., Hurtt, G. C., Moorcroft, P. R., and Birdsey, R. A.: Contributions of land-use history to carbon accumulation in US forests, *Science*, 290, 1148–1151, <https://doi.org/10.1126/science.290.5494.114>, 2000.
- Center for International Earth Science Information Network - CIESIN - Columbia University: Gridded Population of the World, Version 4 (GPWv4) National Identifier Grid, Revision 11., <https://sedac.ciesin.columbia.edu/data/set/gpw-v4-national-identifier-grid-rev11>, accessed 3 March 2021, 2018.
- 1035

- Chandra, N., Patra, P. K., Niwa, Y., Ito, A., Iida, Y., Goto, D., Morimoto, S., Kondo, M., Takigawa, M., Hajima, T., and Watanabe, M.: Estimated regional CO<sub>2</sub> flux and uncertainty based on an ensemble of atmospheric CO<sub>2</sub> inversions, *Atmos. Chem. Phys. Discussions*, 2021, 1–50, <https://doi.org/10.5194/acp-2021-1039>, 2021.
- 1040 Chau, T. T. T., Gehlen, M., and Chevallier, F.: A seamless ensemble-based reconstruction of surface ocean pCO<sub>2</sub> and air–sea CO<sub>2</sub> fluxes over the global coastal and open oceans, *Biogeosciences*, 19, 1087–1109, <https://doi.org/10.5194/bg-19-1087-2022>, 2022.
- Chen, Z., Huntzinger, D. N., Liu, J., Piao, S., Wang, X., Sitch, S., Friedlingstein, P., Anthoni, P., Arneth, A., Bastrikov, V., Goll, D. S., Haverd, V., Jain, A. K., Joetzjer, E., Kato, E., Lienert, S., Lombardozzi, D. L., McGuire, P. C., Melton, J. R., Nabel, J. E. M. S., Pongratz, J., Poulter, B., Tian, H., Wiltshire, A. J., Zaehle, S., and Miller, S. M.: Five years of variability in the global carbon cycle: comparing an estimate from the Orbiting Carbon Observatory-2 and process-based models, *Environ. Res. Lett.*, 16, 054041, <https://doi.org/10.1088/1748-9326/abfac1>, 2021a.
- 1045 Chen, Z., Liu, J., Henze, D. K., Huntzinger, D. N., Wells, K. C., Sitch, S., Friedlingstein, P., Joetzjer, E., Bastrikov, V., Goll, D. S., Haverd, V., Jain, A. K., Kato, E., Lienert, S., Lombardozzi, D. L., McGuire, P. C., Melton, J. R., Nabel, J. E. M. S., Poulter, B., Tian, H., Wiltshire, A. J., Zaehle, S., and Miller, S. M.: Linking global terrestrial CO<sub>2</sub> fluxes and environmental drivers: inferences from the Orbiting Carbon Observatory 2 satellite and terrestrial biospheric models, *Atmos. Chem. Phys.*, 21, 6663–6680, <https://doi.org/10.5194/acp-21-6663-2021>, 2021b.
- 1050 Chevallier, F.: Fluxes of Carbon Dioxide From Managed Ecosystems Estimated by National Inventories Compared to Atmospheric Inverse Modeling, *Geophys. Res. Lett.*, 48, e2021GL093565, <https://doi.org/10.1029/2021GL093565>, 2021.
- Chevallier, F., Engelen, R. J., and Peylin, P.: The contribution of AIRS data to the estimation of CO<sub>2</sub> sources and sinks, *Geophys. Res. Lett.*, 32, <https://doi.org/10.1029/2005GL024229>, 2005a.
- 1055 Chevallier, F., Fisher, M., Peylin, P., Serrar, S., Bousquet, P., Bréon, F.-M., Chédin, A., and Ciais, P.: Inferring CO<sub>2</sub> sources and sinks from satellite observations: Method and application to TOVS data, *J. Geophys. Res.-Atmos.*, 110, <https://doi.org/10.1029/2005JD006390>, 2005b.
- Chevallier, F., Breon, F.-M., and Rayner, P. J.: Contribution of the Orbiting Carbon Observatory to the estimation of CO<sub>2</sub> sources and sinks: Theoretical study in a variational data assimilation framework, *J. Geophys. Res.*, 112, <https://doi.org/10.1029/2006JD007375>, 2007.
- 1060 Ciais, P., Sabine, C., Bala, G., Bopp, L., Brovkin, V., Canadell, J., Chhabra, A., DeFries, R., Galloway, J., Heimann, M., Jones, C., Le Quéré, C., Myneni, R., Piao, S., and Thornton, P.: Carbon and Other Biogeochemical Cycles, pp. 465–570, Cambridge University Press, Cambridge, United Kingdom and New York, NY, USA, <https://doi.org/10.1017/CBO9781107415324.015>, 2013.
- Ciais, P., Yao, Y., Gasser, T., Baccini, A., Wang, Y., Lauerwald, R., Peng, S., Bastos, A., Li, W., Raymond, P. A., Canadell, J. G., Peters, G. P., Andres, R. J., Chang, J., Yue, C., Dolman, A. J., Haverd, V., Hartmann, J., Laruelle, G., Konings, A. G., King, A. W., Liu, Y., Luysaert, S., Maignan, F., Patra, P. K., Pregon, A., Regnier, P., Pongratz, J., Poulter, B., Shvidenko, A., Valentini, R., Wang, R., Broquet, G., Yin, Y., Zscheischler, J., Guenet, B., Goll, D. S., Ballantyne, A. P., Yang, H., Qiu, C., and Zhu, D.: Empirical estimates of regional carbon budgets imply reduced global soil heterotrophic respiration, *Nat. Sci. Rev.*, 8, nwaal45, <https://doi.org/10.1093/nsr/nwaal45>, 2021.
- 1065 Ciais, P., Bastos, A., Chevallier, F., Lauerwald, R., Poulter, B., Canadell, J. G., Hugelius, G., Jackson, R. B., Jain, A., Jones, M., Kondo, M., Luijkx, I. T., Patra, P. K., Peters, W., Pongratz, J., Petrescu, A. M. R., Piao, S., Qiu, C., Von Randow, C., Regnier, P., Saunio, M., Scholes, R., Shvidenko, A., Tian, H., Yang, H., Wang, X., and Zheng, B.: Definitions and methods to estimate regional land carbon fluxes for the second phase of the REgional Carbon Cycle Assessment and Processes Project (RECCAP-2), *Geoscientific Model Development*, 15, 1289–1316, <https://doi.org/10.5194/gmd-15-1289-2022>, 2022.
- 1070

- Cook-Patton, S. C., Leavitt, S. M., Gibbs, D., Harris, N. L., Lister, K., Anderson-Teixeira, K. J., Briggs, R. D., Chazdon, R. L., Crowther, T. W., Ellis, P. W., Griscom, H. P., Herrmann, V., Holl, K. D., Houghton, R. A., Larrosa, C., Lomax, G., Lucas, R., Madsen, P., Malhi, Y., Paquette, A., Parker, J. D., Paul, K., Routh, D., Roxburgh, S., Saatchi, S., van den Hoogen, J., Walker, W. S., Wheeler, C. E., Wood, S. A., Xu, L., and Griscom, B. W.: Mapping carbon accumulation potential from global natural forest regrowth, *Nature*, 585, 545–550, <https://doi.org/10.1038/s41586-020-2686-x>, 2020.
- Cressie, N. and Kang, E. L.: Hot enough for you? A spatial exploratory and inferential analysis of North American climate-change projections, *Math. Geosci.*, 48, 107–121, <https://doi.org/10.1007/s11004-015-9607-9>, 2016.
- Crisp, D., Meijer, Y., Munro, R., Bowman, K., Chatterjee, A., Baker, D., Chevallier, F., Nassar, R., Palmer, P. I., Agusti-Panareda, A., Al-Saadi, J., Ariel, Y., Basu, S., Bergamaschi, P., Boesch, H., Bousquet, P., Bovensmann, H., Bréon, F.-M., Brunner, D., Buchwitz, M., Buisson, F., Burrows, J. P., Butz, A., Ciais, P., Clerbaux, C., Counet, P., Crevoisier, C., Crowell, S., DeCola, P. L., Deniel, C., Dowell, M., Eckman, R., Edwards, D., Ehret, G., Eldering, A., Engelen, R., Fisher, B., Germain, S., Hakkarainen, J., Hilsenrath, E., Holmlund, K., Houweling, S., Hu, H., Jacob, D., Janssens-Maenhout, G., Jones, D. B. A., Jouglet, D., Kataoka, F., Kiel, M., Kulawik, S. S., Kuze, A., Lachance, R. L., Lang, R., Landgraf, J., Liu, J., Liu, Y., Maksyutov, S., Matsunaga, T., McKeever, J., Moore, B., Nakajima, M., Natraj, V., Nelson, R. R., Niwa, Y., Oda, T., O'Dell, C. W., Ott, L., Patra, P., Pawson, S., Payne, V., Pinty, B., Polavarapu, S. M., Retscher, C., Rosenberg, R., Schuh, A., Schwandner, F. M., Shiomi, K., Su, W., Tamminen, J., Taylor, T. E., Veefkind, P., Veihelmann, B., Wofsy, S., Worden, J., Wunch, D., Yang, D., Zhang, P., and Zehner, C.: A constellation architecture for monitoring carbon dioxide and methane from space, Tech. rep., 32nd Committee on Earth Observation Satellites 2018 Plenary, Brussels, Belgium, October 16–18, 2018, 2018.
- Crisp, D., Dolman, H., Tanhua, T., McKinley, G. A., Hauck, J., Bastos, A., Sitch, S., Eggleston, S., and Aich, V.: How Well Do We Understand the Land-Ocean-Atmosphere Carbon Cycle?, *Rev. Geophys.*, 60, e2021RG000736, <https://doi.org/10.1029/2021RG000736>, 2022.
- Crowell, S., Baker, D., Schuh, A., Basu, S., Jacobson, A. R., Chevallier, F., Liu, J., Deng, F., Feng, L., McKain, K., Chatterjee, A., Miller, J. B., Stephens, B. B., Eldering, A., Crisp, D., Schimel, D., Nassar, R., O'Dell, C. W., Oda, T., Sweeney, C., Palmer, P. I., and Jones, D. B. A.: The 2015–2016 carbon cycle as seen from OCO-2 and the global in situ network, *Atmos. Chem. Phys.*, 19, 9797–9831, <https://doi.org/10.5194/acp-19-9797-2019>, 2019.
- De Mazière, M., Sha, M. K., Desmet, F., Hermans, C., Scolas, F., Kumps, N., Metzger, J.-M., Dufлот, V., and Cammas, J.-P.: TCCON data from Réunion Island (RE), Release GGG2014.R1, <https://doi.org/10.14291/TCCON.GGG2014.REUNION01.R1>, 2017.
- Deng, F., Jones, D. B. A., Henze, D. K., Bousserez, N., Bowman, K. W., Fisher, J. B., Nassar, R., O'Dell, C., Wunch, D., Wennberg, P. O., Kort, E. A., Wofsy, S. C., Blumenstock, T., Deutscher, N. M., Griffith, D. W. T., Hase, F., Heikkinen, P., Sherlock, V., Strong, K., Sussmann, R., and Warneke, T.: Inferring regional sources and sinks of atmospheric CO<sub>2</sub> from GOSAT XCO<sub>2</sub> data, *Atmos. Chem. Phys.*, 14, 3703–3727, <https://doi.org/10.5194/acp-14-3703-2014>, 2014.
- Deng, F., Jones, D., O'Dell, C. W., Nassar, R., and Parazoo, N. C.: Combining GOSAT XCO<sub>2</sub> observations over land and ocean to improve regional CO<sub>2</sub> flux estimates, *J. Geophys. Res.-Atmos.*, 121, 1896–1913, <https://doi.org/10.1002/2015JD024157>, 2016.
- Deng, Z., Ciais, P., Tzompa-Sosa, Z. A., Saunio, M., Qiu, C., Tan, C., Sun, T., Ke, P., Cui, Y., Tanaka, K., Lin, X., Thompson, R. L., Tian, H., Yao, Y., Huang, Y., Lauerwald, R., Jain, A. K., Xu, X., Bastos, A., Sitch, S., Palmer, P. I., Lauvaux, T., d'Aspremont, A., Giron, C., Benoit, A., Poulter, B., Chang, J., Petrescu, A. M. R., Davis, S. J., Liu, Z., Grassi, G., Albergel, C., Tubiello, F. N., Perugini, L., Peters, W., and Chevallier, F.: Comparing national greenhouse gas budgets reported in UNFCCC inventories against atmospheric inversions, *Earth Syst. Sci. Data*, 14, 1639–1675, <https://doi.org/10.5194/essd-14-1639-2022>, 2022.
- Denning, A. S., Fung, I. Y., and Randall, D.: Latitudinal gradient of atmospheric CO<sub>2</sub> due to seasonal exchange with land biota, *Nature*, 376, 240, <https://doi.org/10.1038/376240a0>, 1995.

- Denning, A. S., Holzer, M., Gurney, K. R., Heimann, M., Law, R. M., Rayner, P. J., Fung, I. Y., Fan, S.-M., Taguchi, S., Friedlingstein, P., Balkanski, Y., Taylor, J., Maiss, M., and Levin, I.: Three-dimensional transport and concentration of SF<sub>2</sub> A model intercomparison study (TransCom 2), *Tellus B*, 51, 266–297, <https://doi.org/10.3402/tellusb.v51i2.16286>, 1999a.
- 1115 Denning, A. S., Takahashi, T., and Friedlingstein, P.: Can a strong atmospheric CO<sub>2</sub> rectifier effect be reconciled with a “reasonable” carbon budget?, *Tellus B*, 51, 249–253, <https://doi.org/10.3402/tellusb.v51i2.16277>, 1999b.
- Denvil-Sommer, A., Gehlen, M., Vrac, M., and Mejia, C.: LSCE-FFNN-v1: a two-step neural network model for the reconstruction of surface ocean *p*CO<sub>2</sub> over the global ocean, *Geosci. Model Dev.*, 12, 2091–2105, <https://doi.org/10.5194/gmd-12-2091-2019>, 2019.
- Dubey, M., Henderson, B., Green, D., Butterfield, Z., Keppel-Aleks, G., Allen, N., Blavier, J.-F., Roehl, C., Wunch, D., and Lindenmaier, R.: TCCON data from Manaus (BR), Release GGG2014R0, TCCON data archive, hosted by CaltechDATA, 1120 <https://doi.org/10.14291/tcon.ggg2014.manaus01.R0/1149274>, 2014.
- Enting, I. and Mansbridge, J.: Latitudinal distribution of sources and sinks of CO<sub>2</sub>: Results of an inversion study, *Tellus B*, 43, 156–170, <https://doi.org/10.3402/tellusb.v43i2.15261>, 1991.
- Enting, I., Trudinger, C., and Francey, R.: A synthesis inversion of the concentration and  $\delta^{13}\text{C}$  of atmospheric CO<sub>2</sub>, *Tellus B*, 47, 35–52, <https://doi.org/10.1034/j.1600-0889.47.issue1.5.x>, 1995.
- 1125 EPA: Inventory of U.S. Greenhouse Gas Emissions and Sinks: 1990-2020. U.S. Environmental Protection Agency, EPA 430-R-22-003, <https://www.epa.gov/ghgemissions/draft-inventory-us-greenhouse-gas-emissions-and-sinks-1990-2020>, 2022.
- Fay, A. R. and McKinley, G. A.: Observed Regional Fluxes to Constrain Modeled Estimates of the Ocean Carbon Sink, *Geophys. Res. Lett.*, 48, e2021GL095325, <https://doi.org/10.1029/2021GL095325>, 2021.
- Fay, A. R., Gregor, L., Landschützer, P., McKinley, G. A., Gruber, N., Gehlen, M., Iida, Y., Laruelle, G. G., Rödenbeck, C., Roobaert, A., 1130 and Zeng, J.: SeaFlux: harmonization of air–sea CO<sub>2</sub> fluxes from surface *p*CO<sub>2</sub> data products using a standardized approach, *Earth Syst. Sci. Data*, 13, 4693–4710, <https://doi.org/10.5194/essd-13-4693-2021>, 2021.
- Feist, D. G., Arnold, S. G., John, N., and Geibel, M. C.: TCCON data from Ascension Island (SH), Release GGG2014R0, TCCON data archive, hosted by CaltechDATA, <https://doi.org/10.14291/tcon.ggg2014.ascension01.R0/1149285>, 2014.
- Feng, L., Palmer, P. I., Parker, R. J., Deutscher, N. M., Feist, D. G., Kivi, R., Morino, I., and Sussmann, R.: Estimates of European uptake 1135 of CO<sub>2</sub> inferred from GOSAT X<sub>CO<sub>2</sub></sub> retrievals: sensitivity to measurement bias inside and outside Europe, *Atmos. Chem. Phys.*, 16, 1289–1302, <https://doi.org/10.5194/acp-16-1289-2016>, 2016.
- Feng, S., Lauvaux, T., Davis, K. J., Keller, K., Zhou, Y., Williams, C., Schuh, A. E., Liu, J., and Baker, I.: Seasonal characteristics of model uncertainties from biogenic fluxes, transport, and large-scale boundary inflow in atmospheric CO<sub>2</sub> simulations over North America, *J. Geophys. Res.-Atmos.*, 124, 14325–14346, <https://doi.org/10.1029/2019JD031165>, 2019.
- 1140 Fischer, T. P., Arellano, S., Carn, S., Aiuppa, A., Galle, B., Allard, P., Lopez, T., Shinohara, H., Kelly, P., Werner, C., et al.: The emissions of CO<sub>2</sub> and other volatiles from the world’s subaerial volcanoes, *Scientific reports*, 9, 1–11, 2019.
- Frank, D., Reichstein, M., Bahn, M., Thonicke, K., Frank, D., Mahecha, M. D., Smith, P., Van der Velde, M., Vicca, S., Babst, F., Beer, C., Buchmann, N., Canadell, J. G., Ciais, P., Cramer, W., Ibrom, A., Miglietta, F., Poulter, B., Rammig, A., Seneviratne, S. I., Walz, A., Wattenbach, M., Zavala, M. A., and Zscheischler, J.: Effects of climate extremes on the terrestrial carbon cycle: concepts, processes and 1145 potential future impacts, *Global Change Biology*, 21, 2861–2880, <https://doi.org/10.1111/gcb.12916>, 2015.
- Frey, M., Sha, M. K., Hase, F., Kiel, M., Blumenstock, T., Harig, R., Surawicz, G., Deutscher, N. M., Shiomi, K., Franklin, J. E., Bösch, H., Chen, J., Grutter, M., Ohyama, H., Sun, Y., Butz, A., Mengistu Tsidu, G., Ene, D., Wunch, D., Cao, Z., Garcia, O., Ramonet, M., Vogel, F., and Orphal, J.: Building the Collaborative Carbon Column Observing Network (COCCON): long-term stability and ensemble

- performance of the EM27/SUN Fourier transform spectrometer, *Atmos. Meas. Tech.*, 12, 1513–1530, <https://doi.org/10.5194/amt-12-1513-2019>, 2019.
- 1150 Friedlingstein, P., Jones, M. W., O’Sullivan, M., Andrew, R. M., Bakker, D. C. E., Hauck, J., Le Quéré, C., Peters, G. P., Peters, W., Pongratz, J., Sitch, S., Canadell, J. G., Ciais, P., Jackson, R. B., Alin, S. R., Anthoni, P., Bates, N. R., Becker, M., Bellouin, N., Bopp, L., Chau, T. T., Chevallier, F., Chini, L. P., Cronin, M., Currie, K. I., Decharme, B., Djeutchouang, L. M., Dou, X., Evans, W., Feely, R. A., Feng, L., Gasser, T., Gilfillan, D., Gkritzalis, T., Grassi, G., Gregor, L., Gruber, N., Gürses, O., Harris, I., Houghton, R. A., Hurtt, G. C., Iida, Y., Ilyina, T., Luijckx, I. T., Jain, A., Jones, S. D., Kato, E., Kennedy, D., Klein Goldewijk, K., Knauer, J., Korsbakken, J. I., Körtzinger, A., Landschützer, P., Lauvset, S. K., Lefèvre, N., Lienert, S., Liu, J., Marland, G., McGuire, P. C., Melton, J. R., Munro, D. R., Nabel, J. E. M. S., Nakaoka, S.-I., Niwa, Y., Ono, T., Pierrot, D., Poulter, B., Rehder, G., Resplandy, L., Robertson, E., Rödenbeck, C., Rosan, T. M., Schwinger, J., Schwingshackl, C., Séférian, R., Sutton, A. J., Sweeney, C., Tanhua, T., Tans, P. P., Tian, H., Tilbrook, B., Tubiello, F., van der Werf, G. R., Vuichard, N., Wada, C., Wanninkhof, R., Watson, A. J., Willis, D., Wiltshire, A. J., Yuan, W., Yue, C., Yue, X., Zaehle, S., and Zeng, J.: Global Carbon Budget 2021, *Earth Syst. Sci. Data*, 14, 1917–2005, <https://doi.org/10.5194/essd-14-1917-2022>, 2022.
- 1160 Gatti, L. V., Basso, L. S., Miller, J. B., Gloor, M., Gatti Domingues, L., Cassol, H. L., Tejada, G., Aragão, L. E., Nobre, C., Peters, W., Marani, L., Arai, E., Sanches, A. H., Corrêa, S. M., Anderson, L., Randow, C. V., Correia, C. S. C., Crispim, S. P., and Neves, R. A. L.: Amazonia as a carbon source linked to deforestation and climate change, *Nature*, 595, 388–393, <https://doi.org/10.1038/s41586-021-03629-6>, 2021.
- 1165 Gaubert, B., Stephens, B. B., Basu, S., Chevallier, F., Deng, F., Kort, E. A., Patra, P. K., Peters, W., Rödenbeck, C., Saeki, T., Schimel, D., Van der Laan-Luijckx, I., Wofsy, S., and Yin, Y.: Global atmospheric CO<sub>2</sub> inverse models converging on neutral tropical land exchange, but disagreeing on fossil fuel and atmospheric growth rate, *Biogeosciences*, 16, 117–134, <https://doi.org/10.5194/bg-16-117-2019>, 2019.
- Girard, C., Plante, A., Desgagné, M., McTaggart-Cowan, R., Côté, J., Charron, M., Gravel, S., Lee, V., Patoine, A., Qaddouri, A., Roch, M., Spacek, L., Tanguay, M., Vaillancourt, P. A., and Zadra, A.: Staggered vertical discretization of the Canadian Environmental Multiscale (GEM) model using a coordinate of the log-hydrostatic-pressure type, *Mon. Weather Rev.*, 142, 1183–1196, <https://doi.org/10.1175/MWR-D-13-00255.1>, 2014.
- 1170 Gloor, M., Bakwin, P., Hurst, D., Lock, L., Draxler, R., and Tans, P.: What is the concentration footprint of a tall tower?, *J. Geophys. Res.-Atmos.*, 106, 17 831–17 840, <https://doi.org/10.1029/2001JD900021>, 2001.
- Goo, T.-Y., Oh, Y.-S., and Velazco, V. A.: TCCON data from Anmeyondo (KR), Release GGG2014R0, TCCON data archive, hosted by CaltechDATA, <https://doi.org/10.14291/tcon.ggg2014.anmeyondo01.R0/1149284>, 2014.
- 1175 Grassi, G., House, J., Kurz, W. A., Cescatti, A., Houghton, R. A., Peters, G. P., Sanz, M. J., Viñas, R. A., Alkama, R., Arneeth, A., Bondeau, A., Dentener, F., Fader, M., Federici, S., Friedlingstein, P., Jain, A. K., Kato, E., Koven, C. D., Lee, D., Nabel, J. E. M. S., Nassikas, A. A., Perugini, L., Rossi, S., Sitch, S., Viovy, N., Wiltshire, A., and Zaehle, S.: Reconciling global-model estimates and country reporting of anthropogenic forest CO<sub>2</sub> sinks, *Nat. Clim. Change*, 8, 914–920, <https://doi.org/10.1038/s41558-018-0283-x>, 2018.
- 1180 Grassi, G., Conchedda, G., Federici, S., Abad Viñas, R., Korosuo, A., Melo, J., Rossi, S., Sandker, M., Somogyi, Z., Vizzarri, M., and Tubiello, F. N.: Carbon fluxes from land 2000–2020: bringing clarity to countries’ reporting, *Earth System Science Data*, 14, 4643–4666, <https://doi.org/10.5194/essd-14-4643-2022>, 2022.
- Gregor, L. and Fay, A.: SeaFlux: Air-sea CO<sub>2</sub> fluxes for surface pCO<sub>2</sub> data products using a standardised approach, <https://doi.org/10.5281/zenodo.5078404>, version 2021.02, 2021.

- 1185 Gregor, L., Lebehot, A. D., Kok, S., and Scheel Monteiro, P. M.: A comparative assessment of the uncertainties of global surface ocean CO<sub>2</sub> estimates using a machine-learning ensemble (CSIR-ML6 version 2019a) – have we hit the wall?, *Geoscientific Model Development*, 12, 5113–5136, <https://doi.org/10.5194/gmd-12-5113-2019>, 2019.
- Griffith, D. W., Deutscher, N. M., Velazco, V. A., Wennberg, P. O., Yavin, Y., Aleks, G. K., Washenfelder, R. a., Toon, G. C., Blavier, J.-F., Murphy, C., Jones, N., Kettlewell, G., Connor, B. J., Macatangay, R., Roehl, C., Ryzcek, M., Glowacki, J., Culgan, T., and Bryant, G.: TCCON data from Darwin (AU), Release GGG2014R0, TCCON data archive, hosted by CaltechDATA, <https://doi.org/10.14291/tcon.ggg2014.darwin01.R0/1149290>, 2014a.
- 1190 Griffith, D. W., Velazco, V. A., Deutscher, N. M., Murphy, C., Jones, N., Wilson, S., Macatangay, R., Kettlewell, G., Buchholz, R. R., and Riggenbach, M.: TCCON data from Wollongong (AU), Release GGG2014R0, TCCON data archive, hosted by CaltechDATA, <https://doi.org/10.14291/tcon.ggg2014.wollongong01.R0/1149291>, 2014b.
- 1195 Guan, D., Liu, Z., Geng, Y., Lindner, S., and Hubacek, K.: The gigatonne gap in China’s carbon dioxide inventories, *Nat. Clim. Change*, 2, 672–675, <https://doi.org/10.1038/nclimate1560>, 2012.
- Gurney, K. R., Law, R. M., Denning, A. S., Rayner, P. J., Baker, D., Bousquet, P., Bruhwiler, L., Chen, Y.-H., Ciais, P., Fan, S., Fung, I. Y., Gloor, M., Heimann, M., Higuchi, K., John, J., Maki, T., Maksyutov, S., Masarie, K., Peylin, P., Prather, M., Pak, B. C., Randerson, J., Sarmiento, J., Taguchi, S., Takahashi, T., and Yuen, C.-W.: Towards robust regional estimates of CO<sub>2</sub> sources and sinks using atmospheric transport models, *Nature*, 415, 626–630, <https://doi.org/10.1038/415626a>, 2002.
- 1200 Hall, B. D., Crotwell, A. M., Kitzi, D. R., Mefford, T., Miller, B. R., Schibig, M. F., and Tans, P. P.: Revision of the World Meteorological Organization Global Atmosphere Watch (WMO/GAW) CO<sub>2</sub> calibration scale, *Atmos. Meas. Tech.*, 14, 3015–3032, <https://doi.org/10.5194/amt-14-3015-2021>, 2021.
- Harris, N. L., Brown, S., Hagen, S. C., Saatchi, S. S., Petrova, S., Salas, W., Hansen, M. C., Potapov, P. V., and Lotsch, A.: Baseline map of carbon emissions from deforestation in tropical regions, *Science*, 336, 1573–1576, <https://doi.org/10.1126/science.1217962>, 2012.
- 1205 Hase, F., Blumenstock, T., Dohe, S., Gross, J., and Kiel, M.: TCCON data from Karlsruhe (DE), Release GGG2014R1, TCCON data archive, hosted by CaltechDATA, <https://doi.org/10.14291/tcon.ggg2014.karlsruhe01.R1/1182416>, 2014.
- Hoaglin, D. C., Mosteller, F., and Tukey, J. W.: *Exploring data tables, trends, and shapes*, John Wiley & Sons, 1985.
- Hu, L., Andrews, A. E., Thoning, K. W., Sweeney, C., Miller, J. B., Michalak, A. M., Dlugokencky, E., Tans, P. P., Shiga, Y. P., Mountain, M., Nehrkorn, T., Montzka, S. A., McKain, K., Kofler, J., Trudeau, M., Michel, S. E., Biraud, S. C., Fischer, M. L., Worthy, D. E. J., Vaughn, B. H., White, J. W. C., Yadav, V., Basu, S., and van der Velde, I. R.: Enhanced North American carbon uptake associated with El Niño, *Science advances*, 5, eaaw0076, <https://doi.org/10.1126/sciadv.aaw0076>, 2019.
- 1210 Hu, L., Montzka, S. A., Kaushik, A., Andrews, A. E., Sweeney, C., Miller, J., Baker, I. T., Denning, S., Campbell, E., Shiga, Y. P., Tans, P., Siso, M. C., Crotwell, M., McKain, K., Thoning, K., Hall, B., Vimont, I., Elkins, J. W., Whelan, M. E., and Suntharalingam, P.: COS-derived GPP relationships with temperature and light help explain high-latitude atmospheric CO<sub>2</sub> seasonal cycle amplification, *Proceedings of the National Academy of Sciences*, 118, e2103423 118, <https://doi.org/10.1073/pnas.2103423118>, 2021.
- 1215 Iida, Y., Takatani, Y., Kojima, A., and Ishii, M.: Global trends of ocean CO<sub>2</sub> sink and ocean acidification: an observation-based reconstruction of surface ocean inorganic carbon variables, *J. Oceanogr.*, 77, 323–358, <https://doi.org/10.1007/s10872-020-00571-5>, 2021.
- IPCC: 2006 IPCC Guidelines for National Greenhouse Gas Inventories, Prepared by the National Greenhouse Gas Inventories Programme, IGES, Japan, 2006.
- 1220 IPCC: 2019 Refinement to the 2006 IPCC Guidelines for National Greenhouse Gas Inventories, IPCC, Switzerland, 2019.



- Iraci, L. T., Podolske, J., Hillyard, P. W., Roehl, C., Wennberg, P. O., Blavier, J.-F., Allen, N., Wunch, D., Osterman, G. B., and Albertson, R.: TCCON data from Edwards (US), Release GGG2014R1, TCCON data archive, hosted by CaltechDATA, <https://doi.org/10.14291/tcon.ggg2014.edwards01.R1/1255068>, 2016.
- 1225 Jacobson, A. R., Schuldt, K. N., Miller, J. B., Oda, T., Tans, P., Arlyn Andrews, Mund, J., Ott, L., Collatz, G. J., Aalto, T., Afshar, S., Aikin, K., Aoki, S., Apadula, F., Baier, B., Bergamaschi, P., Beyersdorf, A., Biraud, S. C., Bollenbacher, A., Bowling, D., Brailsford, G., Abshire, J. B., Chen, G., Huilin Chen, Lukasz Chmura, Sites Climadat, Colomb, A., Conil, S., Cox, A., Cristofanelli, P., Cuevas, E., Curcoll, R., Sloop, C. D., Davis, K., Wekker, S. D., Delmotte, M., DiGangi, J. P., Dlugokencky, E., Ehleringer, J., Elkins, J. W., Emmenegger, L., Fischer, M. L., Forster, G., Frumau, A., Galkowski, M., Gatti, L. V., Gloor, E., Griffis, T., Hammer, S., Haszpra, L.,
- 1230 Hatakka, J., Heliasz, M., Hensen, A., Hermanssen, O., Hintsa, E., Holst, J., Jaffe, D., Karion, A., Kawa, S. R., Keeling, R., Keronen, P., Kolari, P., Kominkova, K., Kort, E., Krummel, P., Kubistin, D., Labuschagne, C., Langenfelds, R., Laurent, O., Laurila, T., Lauvaux, T., Law, B., Lee, J., Lehner, I., Leuenberger, M., Levin, I., Levula, J., Lin, J., Lindauer, M., Loh, Z., Lopez, M., Luijkx, I. T., Myhre, C. L., Machida, T., Mammarella, I., Manca, G., Manning, A., Manning, A., Marek, M. V., Marklund, P., Martin, M. Y., Matsueda, H., McKain, K., Meijer, H., Meinhardt, F., Miles, N., Miller, C. E., Mölder, M., Montzka, S., Moore, F., Josep-Anton Morgui, Morimoto,
- 1235 S., Munger, B., Jaroslaw Necki, Newman, S., Nichol, S., Niwa, Y., O'Doherty, S., Mikael Ottosson-Löfvenius, Paplawsky, B., Peischl, J., Peltola, O., Jean-Marc Pichon, Piper, S., Plass-Dölmer, C., Ramonet, M., Reyes-Sanchez, E., Richardson, S., Riris, H., Ryerson, T., Saito, K., Sargent, M., Sasakawa, M., Sawa, Y., Say, D., Scheeren, B., Schmidt, M., Schmidt, A., Schumacher, M., Shepson, P., Shook, M., Stanley, K., Steinbacher, M., Stephens, B., Sweeney, C., Thoning, K., Torn, M., Turnbull, J., Tørseth, K., Bulk, P. V. D., Dinker, D. V., Vermeulen, A., Viner, B., Vitkova, G., Walker, S., Weyrauch, D., Wofsy, S., Worthy, D., Dickon Young, and Miroslaw Zimnoch:
- 1240 CarbonTracker CT2019B, <https://doi.org/10.25925/20201008>, 2020.
- Janssens-Maenhout, G., Pinty, B., Dowell, M., Zunker, H., Andersson, E., Balsamo, G., Bézy, J.-L., Brunhes, T., Bösch, H., Bojkov, B., Brunner, D., Buchwitz, M., Crisp, D., Ciais, P., Counet, P., Dee, D., Denier van der Gon, H., Dolman, H., Drinkwater, M. R., Dubovik, O., Engelen, R., Fehr, T., Fernandez, V., Heimann, M., Holmlund, K., Houweling, S., Husband, R., Juvyns, O., Kentarchos, A., Landgraf, J., Lang, R., Löscher, A., Marshall, J., Meijer, Y., Nakajima, M., Palmer, P. I., Peylin, P., Rayner, P., Scholze, M., Sierk, B., Tamminen,
- 1245 J., and Veefkind, P.: Toward an Operational Anthropogenic CO<sub>2</sub> Emissions Monitoring and Verification Support Capacity, *B. A. Meteorol. Soc.*, 101, E1439–E1451, <https://doi.org/10.1175/BAMS-D-19-0017.1>, 2020.
- Karion, A., Sweeney, C., Tans, P., and Newberger, T.: AirCore: An innovative atmospheric sampling system, *J. Atmos Ocean Tech.*, 27, 1839–1853, <https://doi.org/10.1175/2010JTECHA1448.1>, 2010.
- Kaushik, A., Graham, J., Dorheim, K. R., Kramer, R., Wang, J., and Byrne, B.: The future of the carbon cycle in a changing climate, *Eos*,
- 1250 101, <https://doi.org/https://doi.org/10.1029/2020EO140276>, 2020.
- Kawakami, S., Ohshima, H., Arai, K., Okumura, H., Taura, C., Fukamachi, T., and Sakashita, M.: TCCON data from Saga (JP), Release GGG2014R0, TCCON data archive, hosted by CaltechDATA, <https://doi.org/10.14291/tcon.ggg2014.saga01.R0/1149283>, 2014.
- Keeling, R. F. and Graven, H. D.: Insights from Time Series of Atmospheric Carbon Dioxide and Related Tracers, *Annual Review of Environment and Resources*, 46, 85–110, <https://doi.org/10.1146/annurev-environ-012220-125406>, 2021.
- 1255 Keeling, R. F., Graven, H. D., Welp, L. R., Resplandy, L., Bi, J., Piper, S. C., Sun, Y., Bollenbacher, A., and Meijer, H. A.: Atmospheric evidence for a global secular increase in carbon isotopic discrimination of land photosynthesis, *Proceedings of the National Academy of Sciences*, 114, 10361–10366, 2017.

- Kiel, M., O'Dell, C. W., Fisher, B., Eldering, A., Nassar, R., MacDonald, C. G., and Wennberg, P. O.: How bias correction goes wrong: measurement of  $X_{\text{CO}_2}$  affected by erroneous surface pressure estimates, *Atmos. Meas. Tech.*, 12, 2241–2259, <https://doi.org/10.5194/amt-12-2241-2019>, 2019.
- Kivi, R., Heikkinen, P., and Kyrö, E.: TCCON data from Sodankyla (FI), Release GGG2014R0, TCCON data archive, hosted by CaltechDATA, <https://doi.org/10.14291/tccon.ggg2014.sodankyla01.R0/1149280>, 2014.
- Kondo, M., Ichii, K., Patra, P. K., Poulter, B., Calle, L., Koven, C., Pugh, T. A., Kato, E., Harper, A., Zaehe, S., et al.: Plant regrowth as a driver of recent enhancement of terrestrial  $\text{CO}_2$  uptake, *Geophys. Res. Lett.*, 45, 4820–4830, 2018.
- 1265 Kondo, M., Patra, P. K., Sitch, S., Friedlingstein, P., Poulter, B., Chevallier, F., Ciais, P., Canadell, J. G., Bastos, A., Lauerwald, R., et al.: State of the science in reconciling top-down and bottom-up approaches for terrestrial  $\text{CO}_2$  budget, *Global change biology*, 26, 1068–1084, <https://doi.org/10.1111/gcb.14917>, 2020.
- Krol, M., de Bruine, M., Killaars, L., Ouwersloot, H., Pozzer, A., Yin, Y., Chevallier, F., Bousquet, P., Patra, P., Belikov, D., Maksyutov, S., Dhomse, S., Feng, W., and Chipperfield, M. P.: Age of air as a diagnostic for transport timescales in global models, *Geosci. Model Dev.*, 11, 3109–3130, <https://doi.org/10.5194/gmd-11-3109-2018>, 2018.
- 1270 Landschützer, P., Gruber, N., Bakker, D. C., and Schuster, U.: Recent variability of the global ocean carbon sink, *Global Biogeochem. Cy.*, 28, 927–949, <https://doi.org/10.1002/2014GB004853>, 2014.
- Landschützer, P., Gruber, N., and Bakker, D. C. E.: An observation-based global monthly gridded sea surface  $\text{pCO}_2$  product from 1982 onward and its monthly climatology (NCEI Accession 0160558). Version 5.5., <https://doi.org/10.7289/V5Z899N6>, 2020.
- 1275 Law, R. and Simmonds, I.: The sensitivity of deduced  $\text{CO}_2$  sources and sinks to variations in transport and imposed surface concentrations, *Tellus B*, 48, 613–625, <https://doi.org/10.1034/j.1600-0889.1996.t01-4-00001.x>, 1996.
- Law, R., Rayner, P., Denning, A., Erickson, D., Fung, I., Heimann, M., Piper, S., Ramonet, M., Taguchi, S., Taylor, J., et al.: Variations in modeled atmospheric transport of carbon dioxide and the consequences for  $\text{CO}_2$  inversions, *Global Biogeochem. Cy.*, 10, 783–796, <https://doi.org/10.1029/96GB01892>, 1996.
- 1280 Lawson, C. L. and Hanson, R.: Linear least squares with linear inequality constraints, *Solving least squares problems*, pp. 158–173, 1974.
- Liu, C., Wang, W., and Sun, Y.: TCCON data from Hefei (PRC), Release GGG2014.R0, TCCON data archive, hosted by CaltechDATA, <https://doi.org/10.14291/tccon.ggg2014.hefei01.R0>, 2018.
- Liu, J., Fung, I., Kalnay, E., and Kang, J.-S.:  $\text{CO}_2$  transport uncertainties from the uncertainties in meteorological fields, *Geophys. Res. Lett.*, 38, <https://doi.org/10.1029/2011GL047213>, 2011.
- 1285 Liu, J., Bowman, K. W., and Henze, D. K.: Source-receptor relationships of column-average  $\text{CO}_2$  and implications for the impact of observations on flux inversions, *J. Geophys. Res.-Atmos.*, 120, 5214–5236, <https://doi.org/10.1002/2014JD022914>, 2015.
- Liu, J., Bowman, K. W., Schimel, D. S., Parazoo, N. C., Jiang, Z., Lee, M., Bloom, A. A., Wunch, D., Frankenberg, C., Sun, Y., O'Dell, C. W., Gurney, K. R., Menemenlis, D., Gierach, M., Crisp, D., and Eldering, A.: Contrasting carbon cycle responses of the tropical continents to the 2015–2016 El Niño, *Science*, 358, <https://doi.org/10.1126/science.aam5690>, 2017.
- 1290 Liu, J., Baskaran, L., Bowman, K., Schimel, D., Bloom, A. A., Parazoo, N. C., Oda, T., Carroll, D., Menemenlis, D., Joiner, J., Commane, R., Daube, B., Gatti, L. V., McKain, K., Miller, J., Stephens, B. B., Sweeney, C., and Wofsy, S.: Carbon Monitoring System Flux Net Biosphere Exchange 2020 (CMS-Flux NBE 2020), *Earth Syst. Sci. Data*, 13, 299–330, <https://doi.org/10.5194/essd-13-299-2021>, 2021a.
- Liu, M., Tian, H., Yang, Q., Yang, J., Song, X., Lohrenz, S. E., and Cai, W.-J.: Long-term trends in evapotranspiration and runoff over the drainage basins of the Gulf of Mexico during 1901–2008, *Water Resour. Res.*, 49, 1988–2012, <https://doi.org/10.1002/wrcr.20180>, 2013.

- 1295 Liu, Y., Piao, S., Makowski, D., Ciais, P., Gasser, T., Song, J., Wan, S., Peñuelas, J., and Janssens, I. A.: Data-driven quantification of nitrogen enrichment impact on Northern Hemisphere plant biomass, *Environmental Research Letters*, 17, 074 032, <https://doi.org/10.1088/1748-9326/ac7b38>, 2022.
- Liu, Z., Zeng, N., Liu, Y., Kalnay, E., Asrar, G., Wu, B., Cai, Q., Liu, D., and Han, P.: Improving the joint estimation of CO<sub>2</sub> and surface carbon fluxes using a Constrained Ensemble Kalman Filter in COLA (v1.0), *Geosci. Model Dev. Discussions*, 2021, 1–25, <https://doi.org/10.5194/gmd-2021-375>, 2021b.
- 1300 Lu, X., Vitousek, P. M., Mao, Q., Gilliam, F. S., Luo, Y., Turner, B. L., Zhou, G., and Mo, J.: Nitrogen deposition accelerates soil carbon sequestration in tropical forests, *Proceedings of the National Academy of Sciences*, 118, e2020790 118, <https://doi.org/10.1073/pnas.2020790118>, 2021.
- Maksyutov, S., Oda, T., Saito, M., Janardanan, R., Belikov, D., Kaiser, J. W., Zhuravlev, R., Ganshin, A., Valsala, V. K., Andrews, A., Chmura, L., Dlugokencky, E., Haszpra, L., Langenfelds, R. L., Machida, T., Nakazawa, T., Ramonet, M., Sweeney, C., and Worthy, D.: Technical note: A high-resolution inverse modelling technique for estimating surface CO<sub>2</sub> fluxes based on the NIES-TM-FLEXPART coupled transport model and its adjoint, *Atmos. Chem. Phys.*, 21, 1245–1266, <https://doi.org/10.5194/acp-21-1245-2021>, 2021.
- 1305 Masarie, K., Peters, W., Jacobson, A., and Tans, P.: ObsPack: a framework for the preparation, delivery, and attribution of atmospheric greenhouse gas measurements, *Earth Syst. Sci. Data*, 6, 375–384, <https://doi.org/10.5194/essd-6-375-2014>, 2014.
- 1310 Mason Earles, J., Yeh, S., and Skog, K. E.: Timing of carbon emissions from global forest clearance, *Nat. Clim. Change*, 2, 682–685, <https://doi.org/10.1038/nclimate1535>, 2012.
- Mayorga, E., Seitzinger, S. P., Harrison, J. A., Dumont, E., Beusen, A. H., Bouwman, A., Fekete, B. M., Kroeze, C., and Van Drecht, G.: Global nutrient export from WaterSheds 2 (NEWS 2): model development and implementation, *Environ. Modell. Softw.*, 25, 837–853, <https://doi.org/10.1016/j.envsoft.2010.01.007>, 2010.
- 1315 McGlynn, E., Li, S., F Berger, M., Amend, M., and L Harper, K.: Addressing uncertainty and bias in land use, land use change, and forestry greenhouse gas inventories, *Climatic Change*, 170, 1–25, 2022.
- McKinley, G. A., Fay, A. R., Lovenduski, N. S., and Pilcher, D. J.: Natural variability and anthropogenic trends in the ocean carbon sink, *Annu. Rev. Mar. Sci.*, 9, 125–150, <https://doi.org/10.1146/annurev-marine-010816-060529>, 2017.
- McNorton, J. R., Bousseres, N., Agustí-Panareda, A., Balsamo, G., Choulga, M., Dawson, A., Engelen, R., Kipling, Z., and Lang, S.: Representing model uncertainty for global atmospheric CO<sub>2</sub> flux inversions using ECMWF-IFS-46R1, *Geosci. Model Dev.*, 13, 2297–2313, <https://doi.org/10.5194/gmd-13-2297-2020>, 2020.
- 1320 Mearns, L. and et al.: The North American Regional Climate Change Assessment Program dataset, <https://doi.org/10.5065/D6RN35ST>, 2007.
- Messerschmidt, J., Geibel, M. C., Blumenstock, T., Chen, H., Deutscher, N. M., Engel, A., Feist, D. G., Gerbig, C., Gisi, M., Hase, F., Katrynski, K., Kolle, O., Lavrič, J. V., Notholt, J., Palm, M., Ramonet, M., Rettinger, M., Schmidt, M., Sussmann, R., Toon, G. C., Truong, F., Warneke, T., Wennberg, P. O., Wunch, D., and Xueref-Remy, I.: Calibration of TCCON column-averaged CO<sub>2</sub>: the first aircraft campaign over European TCCON sites, *Atmos. Chem. Phys.*, 11, 10 765–10 777, <https://doi.org/10.5194/acp-11-10765-2011>, 2011.
- 1325 Meybeck, M., Dürr, H. H., and Vörösmarty, C. J.: Global coastal segmentation and its river catchment contributors: A new look at land-ocean linkage, *Global Biogeochem. Cy.*, 20, <https://doi.org/10.1029/2005GB002540>, 2006.
- 1330 Miller, C., Crisp, D., DeCola, P., Olsen, S., Randerson, J. T., Michalak, A. M., Alkhaled, A., Rayner, P., Jacob, D. J., Suntharalingam, P., et al.: Precision requirements for space-based X<sub>CO<sub>2</sub></sub> data, *J. Geophys. Res.-Atmos.*, 112, <https://doi.org/10.1029/2006JD007659>, 2007.

- Miller, J. B., Martins, G. A., de Souza, R. A., and Schuldt, K. N.: Manaus Aircraft profile data for the period 2017-2020; obspack\_multi-species\_1\_manau\_profiles\_v1.0\_2021-05-19, <https://doi.org/10.25925/20210519>, 2021.
- 1335 Miller, S. M., Saibaba, A. K., Trudeau, M. E., Mountain, M. E., and Andrews, A. E.: Geostatistical inverse modeling with very large datasets: an example from the Orbiting Carbon Observatory 2 (OCO-2) satellite, *Geosci. Model Dev.*, 13, 1771–1785, <https://doi.org/10.5194/gmd-13-1771-2020>, 2020.
- Monteil, G., Broquet, G., Scholze, M., Lang, M., Karstens, U., Gerbig, C., Koch, F.-T., Smith, N. E., Thompson, R. L., Lujikx, I. T., White, E., Meesters, A., Ciais, P., Ganesan, A. L., Manning, A., Mischurow, M., Peters, W., Peylin, P., Tarniewicz, J., Rigby, M., Rödenbeck, C., Vermeulen, A., and Walton, E. M.: The regional European atmospheric transport inversion comparison, EUROCOM: first results on European-wide terrestrial carbon fluxes for the period 2006–2015, *Atmospheric Chemistry and Physics*, 20, 12 063–12 091, <https://doi.org/10.5194/acp-20-12063-2020>, 2020.
- Morino, I., Yokozeki, N., Matzuzaki, T., and Horikawa, M.: TCCON data from Rikubetsu (JP), Release GGG2014R1, TCCON data archive, hosted by CaltechDATA, <https://doi.org/10.14291/tcon.ggg2014.rikubetsu01.R1/1242265>, 2014.
- 1345 Morino, I., Matsuzaki, T., and Horikawa, M.: TCCON data from Tsukuba (JP), 125HR, Release GGG2014.R2, <https://doi.org/10.14291/TCCON.GGG2014.TSUKUBA02.R2>, 2018a.
- Morino, I., Velazco, V. A., Akihiro, H., Osamu, U., and Griffith, D. W. T.: TCCON data from Burgos, Ilocos Norte (PH), Release GGG2014.R0, TCCON data archive, hosted by CaltechDATA, <https://doi.org/10.14291/tcon.ggg2014.burgos01.R0>, 2018b.
- Nara, H., Tanimoto, H., Tohjima, Y., Mukai, H., Nojiri, Y., and Machida, T.: Emission factors of CO<sub>2</sub>, CO and CH<sub>4</sub> from Sumatran peatland fires in 2013 based on shipboard measurements, *Tellus B*, 69, 1399 047, <https://doi.org/10.1080/16000889.2017.1399047>, 2017.
- 1350 Nassar, R., Jones, D. B. A., Suntharalingam, P., Chen, J. M., Andres, R. J., Wecht, K. J., Yantosca, R. M., Kulawik, S. S., Bowman, K. W., Worden, J. R., Machida, T., and Matsueda, H.: Modeling global atmospheric CO<sub>2</sub> with improved emission inventories and CO<sub>2</sub> production from the oxidation of other carbon species, *Geosci. Model Dev.*, 3, 689, <https://doi.org/10.5194/gmd-3-689-2010>, 2010.
- Nassar, R., Napier-Linton, L., Gurney, K. R., Andres, R. J., Oda, T., Vogel, F. R., and Deng, F.: Improving the temporal and spatial distribution of CO<sub>2</sub> emissions from global fossil fuel emission data sets, *J. Geophys. Res.-Atmos.*, 118, 917–933, <https://doi.org/10.1029/2012JD018196>, 2013.
- 1355 Niwa, Y., Fujii, Y., Sawa, Y., Iida, Y., Ito, A., Satoh, M., Imasu, R., Tsuboi, K., Matsueda, H., and Saigusa, N.: A 4D-Var inversion system based on the icosahedral grid model (NICAM-TM 4D-Var v1.0) – Part 2: Optimization scheme and identical twin experiment of atmospheric CO<sub>2</sub> inversion, *Geosci. Model Dev.*, 10, 2201–2219, <https://doi.org/10.5194/gmd-10-2201-2017>, 2017.
- 1360 Notholt, J., Petri, C., Warneke, T., Deutscher, N. M., Palm, M., Buschmann, M., Weinzierl, C., Macatangay, R. C., and Grupe, P.: TCCON data from Bremen (DE), Release GGG2014.R1, <https://doi.org/10.14291/TCCON.GGG2014.BREMEN01.R1>, 2019a.
- Notholt, J., Warneke, T., Petri, C., Deutscher, N. M., Weinzierl, C., Palm, M., and Buschmann, M.: TCCON data from Ny Ålesund, Spitsbergen (NO), Release GGG2014.R1, <https://doi.org/10.14291/TCCON.GGG2014.NYALESUND01.R1>, 2019b.
- Oda, T. and Maksyutov, S.: A very high-resolution (1 km × 1 km) global fossil fuel CO<sub>2</sub> emission inventory derived using a point source database and satellite observations of nighttime lights, *Atmos. Chem. Phys.*, 11, 543–556, <https://doi.org/10.5194/acp-11-543-2011>, 2011.
- 1365 Oda, T., Ott, L., Topylko, P., Halushchak, M., Bun, R., Lesiv, M., Danylo, O., and Horabik-Pyzel, J.: Uncertainty associated with fossil fuel carbon dioxide (CO<sub>2</sub>) gridded emission datasets, 2015.
- Oda, T., Maksyutov, S., and Andres, R. J.: The Open-source Data Inventory for Anthropogenic CO<sub>2</sub>, version 2016 (ODIAC2016): a global monthly fossil fuel CO<sub>2</sub> gridded emissions data product for tracer transport simulations and surface flux inversions, *Earth Syst. Sci. Data*, 10, 87–107, <https://doi.org/10.5194/essd-10-87-2018>, 2018.
- 1370

- Oda, T., Bun, R., Kinakh, V., Topylko, P., Halushchak, M., Marland, G., Lauvaux, T., Jonas, M., Maksyutov, S., Nahorski, Z., et al.: Errors and uncertainties in a gridded carbon dioxide emissions inventory, *Mitig. Adapt. Strat. Gl.*, 24, 1007–1050, <https://doi.org/10.1007/s11027-019-09877-2>, 2019.
- 1375 O'Dell, C. W., Eldering, A., Wennberg, P. O., Crisp, D., Gunson, M. R., Fisher, B., Frankenberg, C., Kiel, M., Lindqvist, H., Mandrake, L., Merrelli, A., Natraj, V., Nelson, R. R., Osterman, G. B., Payne, V. H., Taylor, T. E., Wunch, D., Drouin, B. J., Oyafuso, F., Chang, A., McDuffie, J., Smyth, M., Baker, D. F., Basu, S., Chevallier, F., Crowell, S. M. R., Feng, L., Palmer, P. I., Dubey, M., García, O. E., Griffith, D. W. T., Hase, F., Iraci, L. T., Kivi, R., Morino, I., Notholt, J., Ohyama, H., Petri, C., Roehl, C. M., Sha, M. K., Strong, K., Sussmann, R., Te, Y., Uchino, O., and Velazco, V. A.: Improved retrievals of carbon dioxide from Orbiting Carbon Observatory-2 with the version 8 ACOS algorithm, *Atmos. Meas. Tech.*, 11, 6539–6576, <https://doi.org/10.5194/amt-11-6539-2018>, 2018.
- 1380 Ogle, S. M., Domke, G., Kurz, W. A., Rocha, M. T., Huffman, T., Swan, A., Smith, J. E., Woodall, C., and Krug, T.: Delineating managed land for reporting national greenhouse gas emissions and removals to the United Nations framework convention on climate change, *Carbon balance and management*, 13, 1–13, 2018.
- Palmer, P. I., Feng, L., Baker, D., Chevallier, F., Bösch, H., and Somkuti, P.: Net carbon emissions from African biosphere dominate pan-tropical atmospheric CO<sub>2</sub> signal, *Nat. commun.*, 10, 1–9, <https://doi.org/10.1038/s41467-019-11097-w>, 2019.
- 1385 Peiro, H., Crowell, S., Schuh, A., Baker, D. F., O'Dell, C., Jacobson, A. R., Chevallier, F., Liu, J., Eldering, A., Crisp, D., Deng, F., Weir, B., Basu, S., Johnson, M. S., Philip, S., and Baker, I.: Four years of global carbon cycle observed from the Orbiting Carbon Observatory 2 (OCO-2) version 9 and in situ data and comparison to OCO-2 version 7, *Atmos. Chem. Phys.*, 22, 1097–1130, <https://doi.org/10.5194/acp-22-1097-2022>, 2022.
- Penman, J., Gytarsky, M., Hiraishi, T., Krug, T., Kruger, D., Pipatti, R., Buendia, L., Miwa, K., Ngara, T., Tanabe, K., et al.: Good practice guidance for land use, land-use change and forestry., *Good practice guidance for land use, land-use change and forestry.*, 2003.
- 1390 Peters, W., van der Velde, I. R., Van Schaik, E., Miller, J. B., Ciais, P., Duarte, H. F., van der Laan-Luijkx, I. T., van der Molen, M. K., Scholze, M., Schaefer, K., et al.: Increased water-use efficiency and reduced CO<sub>2</sub> uptake by plants during droughts at a continental scale, *Nat. Geosci.*, 11, 744–748, <https://doi.org/10.1038/s41561-018-0212-7>, 2018.
- Petrescu, A. M. R., McGrath, M. J., Andrew, R. M., Peylin, P., Peters, G. P., Ciais, P., Broquet, G., Tubiello, F. N., Gerbig, C., Pongratz, J., 1395 Janssens-Maenhout, G., Grassi, G., Nabuurs, G.-J., Regnier, P., Lauerwald, R., Kuhnert, M., Balkovič, J., Schelhaas, M.-J., Denier van der Gon, H. A. C., Solazzo, E., Qiu, C., Pilli, R., Konovalov, I. B., Houghton, R. A., Günther, D., Perugini, L., Crippa, M., Ganzenmüller, R., Luijkx, I. T., Smith, P., Munassar, S., Thompson, R. L., Conchedda, G., Monteil, G., Scholze, M., Karstens, U., Brockmann, P., and Dolman, A. J.: The consolidated European synthesis of CO<sub>2</sub> emissions and removals for the European Union and United Kingdom: 1990–2018, *Earth System Science Data*, 13, 2363–2406, <https://doi.org/10.5194/essd-13-2363-2021>, 2021.
- 1400 Petri, C., Vrekoussis, M., Rousogenous, C., Warneke, T., Sciare, J., and Notholt, J.: TCCON data from Nicosia, Cyprus (CY), Release GGG2014.R0 , TCCON data archive, hosted by CaltechDATA, <https://doi.org/10.14291/tccon.ggg2014.nicosia01.R0>, 2020.
- Peylin, P., Bacour, C., MacBean, N., Leonard, S., Rayner, P., Kuppel, S., Koffi, E., Kane, A., Maignan, F., Chevallier, F., Ciais, P., and Prunet, P.: A new stepwise carbon cycle data assimilation system using multiple data streams to constrain the simulated land surface carbon cycle, *Geosci. Model Dev.*, 9, 3321–3346, <https://doi.org/10.5194/gmd-9-3321-2016>, 2016.
- 1405 Philip, S., Johnson, M. S., Potter, C., Genovesse, V., Baker, D. F., Haynes, K. D., Henze, D. K., Liu, J., and Poulter, B.: Prior biosphere model impact on global terrestrial CO<sub>2</sub> fluxes estimated from OCO-2 retrievals, *Atmos. Chem. Phys. Discuss.*, 2019, 1–29, <https://doi.org/10.5194/acp-2018-1095>, 2019.

- Philip, S., Johnson, M. S., Baker, D. F., Basu, S., Tiwari, Y. K., Indira, N. K., Ramonet, M., and Poulter, B.: OCO-2 Satellite-Imposed Constraints on Terrestrial Biospheric CO<sub>2</sub> Fluxes Over South Asia, *J. Geophys. Res.-Atmos.*, 127, e2021JD035035, <https://doi.org/10.1029/2021JD035035>, 2022.
- 1410
- Pinty, B., Janssens-Maenhout, G., Dowell, M., Zunker, H., Brunhes, T., Ciais, P., Dee, D., van der Gon, H. D., Dolman, H., Drinkwater, M., Engelen, R., Heimann, M., Holmlund, K., Husband, R., Kentarchos, A., Meijer, Y., Palmer, P., and Scholze, M.: An operational anthropogenic CO<sub>2</sub> emissions monitoring and verification support capacity. Baseline requirements, model components and functional architecture, Tech. rep., European Commission Joint Research Centre, Brussels, <http://resolver.tudelft.nl/uuid:832e87d0-0ed8-44b2-8867-8714cebde4cb>, 2017.
- 1415
- Polavarapu, S. M., Neish, M., Tanguay, M., Girard, C., Grandpré, J. d., Semeniuk, K., Gravel, S., Ren, S., Roche, S., Chan, D., et al.: Greenhouse gas simulations with a coupled meteorological and transport model: the predictability of CO<sub>2</sub>, *Atmos. Chem. Phys.*, 16, 12005–12038, <https://doi.org/10.5194/acp-16-12005-2016>, 2016.
- Polavarapu, S. M., Deng, F., Byrne, B., Jones, D. B. A., and Neish, M.: A comparison of posterior atmospheric CO<sub>2</sub> adjustments obtained from in situ and GOSAT constrained flux inversions, *Atmos. Chem. Phys.*, 18, 12011–12044, <https://doi.org/10.5194/acp-18-12011-2018>, 2018.
- 1420
- Randerson, J., Chapin, F., Harden, J., Neff, J., and Harmon, M.: Net ecosystem production: a comprehensive measure of net carbon accumulation by ecosystems, *Ecological applications*, 12, 937–947, [https://doi.org/10.1890/1051-0761\(2002\)012\[0937:NEPACM\]2.0.CO;2](https://doi.org/10.1890/1051-0761(2002)012[0937:NEPACM]2.0.CO;2), 2002.
- 1425
- Rayner, P. J., Michalak, A. M., and Chevallier, F.: Fundamentals of data assimilation applied to biogeochemistry, *Atmos. Chem. Phys.*, 19, 13911–13932, <https://doi.org/10.5194/acp-19-13911-2019>, 2019.
- Regnier, P., Resplandy, L., Najjar, R. G., and Ciais, P.: The land-to-ocean loops of the global carbon cycle, *Nature*, 603, 401–410, <https://doi.org/10.1038/s41586-021-04339-9>, 2022.
- Remaud, M., Chevallier, F., Cozic, A., Lin, X., and Bousquet, P.: On the impact of recent developments of the LMDz atmospheric general circulation model on the simulation of CO<sub>2</sub> transport, *Geosci. Model Dev.*, 11, 4489–4513, <https://doi.org/10.5194/gmd-11-4489-2018>, 2018.
- 1430
- Remaud, M., Chevallier, F., Maignan, F., Belviso, S., Berchet, A., Parouffe, A., Abadie, C., Bacour, C., Lennartz, S., and Peylin, P.: Plant gross primary production, plant respiration and carbonyl sulfide emissions over the globe inferred by atmospheric inverse modelling, *Atmos. Chem. Phys.*, 22, 2525–2552, <https://doi.org/10.5194/acp-22-2525-2022>, 2022.
- 1435
- Ren, W., Tian, H., Tao, B., Yang, J., Pan, S., Cai, W.-J., Lohrenz, S. E., He, R., and Hopkinson, C. S.: Large increase in dissolved inorganic carbon flux from the Mississippi River to Gulf of Mexico due to climatic and anthropogenic changes over the 21st century, *J. Geophys. Res. - Biogeo.*, 120, 724–736, <https://doi.org/10.1002/2014JG002761>, 2015.
- Ren, W., Tian, H., Cai, W.-J., Lohrenz, S. E., Hopkinson, C. S., Huang, W.-J., Yang, J., Tao, B., Pan, S., and He, R.: Century-long increasing trend and variability of dissolved organic carbon export from the Mississippi River basin driven by natural and anthropogenic forcing, *Global Biogeochem. Cy.*, 30, 1288–1299, <https://doi.org/10.1002/2016GB005395>, 2016.
- 1440
- Resplandy, L., Keeling, R., Rödenbeck, C., Stephens, B., Khatiwala, S., Rodgers, K., Long, M., Bopp, L., and Tans, P.: Revision of global carbon fluxes based on a reassessment of oceanic and riverine carbon transport, *Nat. Geosci.*, 11, 504–509, <https://doi.org/10.1038/s41561-018-0151-3>, 2018.

- Rödenbeck, C., Keeling, R. F., Bakker, D. C. E., Metzl, N., Olsen, A., Sabine, C., and Heimann, M.: Global surface-ocean pCO<sub>2</sub> and sea–air CO<sub>2</sub> flux variability from an observation-driven ocean mixed-layer scheme, *Ocean Sci.*, 9, 193–216, <https://doi.org/10.5194/os-9-193-2013>, 2013.
- Rödenbeck, C., Zaehle, S., Keeling, R., and Heimann, M.: How does the terrestrial carbon exchange respond to inter-annual climatic variations? A quantification based on atmospheric CO<sub>2</sub> data, *Biogeosciences*, 15, 2481–2498, <https://doi.org/10.5194/bg-15-2481-2018>, 2018.
- Saeki, T. and Patra, P. K.: Implications of overestimated anthropogenic CO<sub>2</sub> emissions on East Asian and global land CO<sub>2</sub> flux inversion, *Geoscience Letters*, 4, 1–10, <https://doi.org/10.1186/s40562-017-0074-7>, 2017.
- Schuh, A. E., Jacobson, A. R., Basu, S., Weir, B., Baker, D., Bowman, K., Chevallier, F., Crowell, S., Davis, K. J., Deng, F., et al.: Quantifying the impact of atmospheric transport uncertainty on CO<sub>2</sub> surface flux estimates, *Global Biogeochem. Cy.*, 33, 484–500, <https://doi.org/10.1029/2018GB006086>, 2019.
- Schuh, A. E., Otte, M., Lauvaux, T., and Oda, T.: Far-field biogenic and anthropogenic emissions as a dominant source of variability in local urban carbon budgets: A global high-resolution model study with implications for satellite remote sensing, *Remote Sensing of Environment*, 262, 112473, <https://doi.org/10.1016/j.rse.2021.112473>, 2021.
- Schuh, A. E., Byrne, B., Jacobson, A. R., Crowell, S. M. R., Deng, F., Baker, D. F., Johnson, M. S., Philip, S., and Weir, B.: On the role of atmospheric model transport uncertainty in estimating the Chinese land carbon sink, *Nature*, 603, E13–E14, <https://doi.org/10.1038/s41586-021-04258-9>, 2022.
- Schuldt, K. N., Jacobson, A. R., Aalto, T., Andrews, A., Bakwin, P., Bergamaschi, P., Biermann, T., Biraud, S. C., Chen, H., Colomb, A., Conil, S., Cristofanelli, P., De Mazière, M., De Wekker, S., Delmotte, M., Dlugokencky, E., Emmenegger, L., Fischer, M. L., Hatakka, J., Heliasz, M., Hermanssen, O., Holst, J., Jaffe, D., Karion, A., Kazan, V., Keronen, P., Kominkova, K., Kubistin, D., Laurent, O., Laurila, T., Lee, J., Lehner, I., Leuenberger, M., Lindauer, M., Lopez, M., Mammarella, I., Manca, G., Marek, M. V., McKain, K., Miller, J. B., Miller, C. E., Myhre, C. L., Mölder, M., Müller-Williams, J., Piacentino, S., Pichon, J. M., Plass-Duelmer, C., Ramonet, M., Scheeren, B., Schumacher, M., Sha, M. K., Sloop, C. D., Smith, P., Steinbacher, M., Sweeney, C., Tans, P., Thoning, K., Trisolino, P., Tørseth, K., Viner, B., Vitkova, G., and di Sarra, A. G.: Multi-laboratory compilation of atmospheric carbon dioxide data for the years 2020–2021; obspack\_co2\_1\_NRT\_v6.1.1\_2021-05-17, <https://doi.org/10.25925/20210517>, 2021a.
- Schuldt, K. N., Mund, J., Lujikx, I. T., Aalto, T., Abshire, J. B., Aikin, K., Andrews, A., Aoki, S., Apadula, F., Baier, B., Bakwin, P., Bartyzel, J., Bentz, G., Bergamaschi, P., Beyersdorf, A., Biermann, T., Biraud, S. C., Boenisch, H., Bowling, D., Brailsford, G., Chen, G., Chen, H., Chmura, L., Clark, S., Climadat, S., Colomb, A., Commane, R., Conil, S., Cox, A., Cristofanelli, P., Cuevas, E., Curcoll, R., Daube, B., Davis, K., Mazière, M. D., De Wekker, S., Della Coletta, J., Delmotte, M., DiGangi, J. P., Dlugokencky, E., Elkins, J. W., Emmenegger, L., Fang, S., Fischer, M. L., Forster, G., Frumau, A., Galkowski, M., Gatti, L. V., Gehrlein, T., Gerbig, C., Gheusi, F., Gloor, E., Gomez-Trueba, V., Goto, D., Griffis, T., Hammer, S., Hanson, C., Haszpra, L., Hatakka, J., Heimann, M., Heliasz, M., Hensen, A., Hermanssen, O., Hintsa, E., Holst, J., Jaffe, D., Joubert, W., Karion, A., Kawa, S. R., Kazan, V., Keeling, R., Keronen, P., Kolari, P., Kominkova, K., Kort, E., Kozlova, E., Krummel, P., Kubistin, D., Labuschagne, C., Lam, D. H., Langenfelds, R., Laurent, O., Laurila, T., Lauvaux, T., Law, B., Lee, O. S., Lee, J., Lehner, I., Leppert, R., Leuenberger, M., Levin, I., Levula, J., Lin, J., Lindauer, M., Loh, Z., Lopez, M., Machida, T., Mammarella, I., Manca, G., Manning, A., Manning, A., Marek, M. V., Martin, M. Y., Matsueda, H., McKain, K., Meijer, H., Meinhardt, F., Merchant, L., Mihalopoulos, N., Miles, N., Miller, C. E., Miller, J. B., Mitchell, L., Montzka, S., Moore, F., Morgan, E., Morgui, J.-A., Morimoto, S., Munger, B., Myhre, C. L., Mölder, M., Obersteiner, F., Müller-Williams, J., Necki, J., Newman, S., Nichol, S., Niwa, Y., O’Doherty, S., Paplawsky, B., Peischl, J., Peltola, O., Pichon, J. M., Piper, S., Plass-Duelmer, C., Ramonet, M., Ramos, R., Reyes-Sanchez, E., Richardson, S., Riris, H., Rivas, P. P., Ryerson, T., Saito, K., Sargent, M., Sasakawa, M., Sawa, Y., Say, D., Scheeren,

- B., Schuck, T., Schumacher, M., Seifert, T., Sha, M. K., Shepson, P., Shook, M., Sloop, C. D., Smith, P., Steinbacher, M., Stephens, B., Sweeney, C., Tans, P., Thoning, K., Timas, H., Torn, M., Trisolino, P., Turnbull, J., Tørseth, K., Vermeulen, A., Viner, B., Vitkova, G., Walker, S., Watson, A., Wofsy, S., Worsley, J., Worthy, D., Young, D., Zahn, A., Zimnoch, M., van Dinter, D., and van den Bulk, P.: Multi-laboratory compilation of atmospheric carbon dioxide data for the period 1957-2019; obspack\_co2\_1\_GLOBALVIEWplus\_v6.1\_2021-03-01, <https://doi.org/10.25925/20201204>, 2021b.
- Schulte-Uebbing, L. F., Ros, G. H., and de Vries, W.: Experimental evidence shows minor contribution of nitrogen deposition to global forest carbon sequestration, *Global Change Biology*, 28, 899–917, <https://doi.org/10.1111/gcb.15959>, 2022.
- Sha, M. K., De Mazière, M., Notholt, J., Blumenstock, T., Chen, H., Dehn, A., Griffith, D. W. T., Hase, F., Heikkinen, P., Hermans, C., Hoffmann, A., Huebner, M., Jones, N., Kivi, R., Langerock, B., Petri, C., Scolas, F., Tu, Q., and Weidmann, D.: Intercomparison of low- and high-resolution infrared spectrometers for ground-based solar remote sensing measurements of total column concentrations of CO<sub>2</sub>, CH<sub>4</sub>, and CO, *Atmospheric Measurement Techniques*, 13, 4791–4839, <https://doi.org/10.5194/amt-13-4791-2020>, 2020.
- Sherlock, V., Connor, B. J., Robinson, J., Shiona, H., Smale, D., and Pollard, D.: TCCON data from Lauder (NZ), 120HR, Release GGG2014R0, TCCON data archive, hosted by CaltechDATA, <https://doi.org/10.14291/tcon.ggg2014.lauder01.R0/1149293>, 2014.
- Stanevich, I., Jones, D. B. A., Strong, K., Parker, R. J., Boesch, H., Wunch, D., Notholt, J., Petri, C., Warneke, T., Sussmann, R., Schneider, M., Hase, F., Kivi, R., Deutscher, N. M., Velazco, V. A., Walker, K. A., and Deng, F.: Characterizing model errors in chemical transport modeling of methane: impact of model resolution in versions v9-02 of GEOS-Chem and v35j of its adjoint model, *Geosci. Model Dev.*, 13, 3839–3862, <https://doi.org/10.5194/gmd-13-3839-2020>, 2020.
- Steinkamp, K., Mikaloff Fletcher, S. E., Brailsford, G., Smale, D., Moore, S., Keller, E. D., Baisden, W. T., Mukai, H., and Stephens, B. B.: Atmospheric CO<sub>2</sub> observations and models suggest strong carbon uptake by forests in New Zealand, *Atmos. Chem. Phys.*, 17, 47–76, <https://doi.org/10.5194/acp-17-47-2017>, 2017.
- Stephens, B. B., Gurney, K. R., Tans, P. P., Sweeney, C., Peters, W., Bruhwiler, L., Ciais, P., Ramonet, M., Bousquet, P., Nakazawa, T., et al.: Weak northern and strong tropical land carbon uptake from vertical profiles of atmospheric CO<sub>2</sub>, *Science*, 316, 1732–1735, <https://doi.org/10.1126/science.1137004>, 2007.
- Strong, K., Roche, S., Franklin, J., Mendonca, J., Lutsch, E., Weaver, D., Fogal, P., Drummond, J., Batchelor, R., and Lindenmaier, R.: TCCON data from Eureka (CA), Release GGG2014.R3 (Version R3), TCCON data archive, hosted by CaltechDATA, <https://doi.org/10.14291/TCCON.GGG2014.EUREKA01.R3>, 2019.
- Suntharalingam, P., Randerson, J. T., Krakauer, N., Logan, J. A., and Jacob, D. J.: Influence of reduced carbon emissions and oxidation on the distribution of atmospheric CO<sub>2</sub>: Implications for inversion analyses, *Global Biogeochem. Cy.*, 19, <https://doi.org/10.1029/2005GB002466>, 2005.
- Sussmann, R. and Rettinger, M.: TCCON data from Garmisch (DE), Release GGG2014.R2, <https://doi.org/10.14291/TCCON.GGG2014.GARMISCH01.R2>, 2018a.
- Sussmann, R. and Rettinger, M.: TCCON data from Zugspitze (DE), Release GGG2014R1, TCCON data archive, hosted by CaltechDATA, <https://doi.org/10.14291/tcon.ggg2014.zugspitze01.R1>, 2018b.
- Tans, P. P., Fung, I. Y., and Takahashi, T.: Observational constraints on the global atmospheric CO<sub>2</sub> budget, *Science*, 247, 1431–1438, <https://doi.org/10.1126/science.247.4949.1431>, 1990.
- Tao, B., Tian, H., Ren, W., Yang, J., Yang, Q., He, R., Cai, W., and Lohrenz, S.: Increasing Mississippi river discharge throughout the 21st century influenced by changes in climate, land use, and atmospheric CO<sub>2</sub>, *Geophys. Res. Lett.*, 41, 4978–4986, <https://doi.org/10.1002/2014GL060361>, 2014.



- 1520 Tarantola, A.: Inverse problem theory and methods for model parameter estimation, SIAM, 2005.
- Te, Y., Jeseck, P., and Janssen, C.: TCCON data from Paris (FR), Release GGG2014R0, TCCON data archive, hosted by CaltechDATA, <https://doi.org/10.14291/tcon.ggg2014.paris01.R0/1149279>, 2014.
- Thoning, K. W., Tans, P. P., and Komhyr, W. D.: Atmospheric carbon dioxide at Mauna Loa Observatory: 2. Analysis of the NOAA GMCC data, 1974–1985, *J. Geophys. Res.-Atmos.*, 94, 8549–8565, 1989.
- 1525 Tian, H., Xu, X., Liu, M., Ren, W., Zhang, C., Chen, G., and Lu, C.: Spatial and temporal patterns of CH<sub>4</sub> and N<sub>2</sub>O fluxes in terrestrial ecosystems of North America during 1979–2008: application of a global biogeochemistry model, *Biogeosciences*, 7, 2673–2694, <https://doi.org/10.5194/bg-7-2673-2010>, 2010.
- Tian, H., Ren, W., Yang, J., Tao, B., Cai, W.-J., Lohrenz, S. E., Hopkinson, C. S., Liu, M., Yang, Q., Lu, C., et al.: Climate extremes dominating seasonal and interannual variations in carbon export from the Mississippi River Basin, *Global Biogeochem. Cy.*, 29, 1333–1347, 2015a.
- 1530 Tian, H., Yang, Q., Najjar, R. G., Ren, W., Friedrichs, M. A., Hopkinson, C. S., and Pan, S.: Anthropogenic and climatic influences on carbon fluxes from eastern North America to the Atlantic Ocean: A process-based modeling study, *J. Geophys. Res. - Biogeo.*, 120, 757–772, 2015b.
- Tian, H., Xu, R., Pan, S., Yao, Y., Bian, Z., Cai, W.-J., Hopkinson, C. S., Justic, D., Lohrenz, S., Lu, C., et al.: Long-term trajectory of nitrogen loading and delivery from Mississippi River Basin to the Gulf of Mexico, *Global Biogeochem. Cy.*, 34, e2019GB006475, 2020.
- 1535 Tohjima, Y., Mukai, H., Machida, T., Nojiri, Y., and Gloor, M.: First measurements of the latitudinal atmospheric O<sub>2</sub> and CO<sub>2</sub> distributions across the western Pacific, *Geophys. Res. Lett.*, 32, 2005.
- van der Laan-Luijkx, I. T., van der Velde, I. R., van der Veen, E., Tsuruta, A., Stanislawski, K., Babenhauerheide, A., Zhang, H. F., Liu, Y., He, W., Chen, H., Masarie, K. A., Krol, M. C., and Peters, W.: The CarbonTracker Data Assimilation Shell (CTDAS) v1.0: implementation and global carbon balance 2001–2015, *Geosci. Model Dev.*, 10, 2785–2800, <https://doi.org/10.5194/gmd-10-2785-2017>, 2017.
- 1540 van der Werf, G. R., Randerson, J. T., Giglio, L., van Leeuwen, T. T., Chen, Y., Rogers, B. M., Mu, M., van Marle, M. J. E., Morton, D. C., Collatz, G. J., Yokelson, R. J., and Kasibhatla, P. S.: Global fire emissions estimates during 1997–2016, *Earth Syst. Sci. Data*, 9, 697–720, <https://doi.org/10.5194/essd-9-697-2017>, 2017.
- Walker, A. P., De Kauwe, M. G., Bastos, A., Belmecheri, S., Georgiou, K., Keeling, R. F., McMahon, S. M., Medlyn, B. E., Moore, D. J., Norby, R. J., et al.: Integrating the evidence for a terrestrial carbon sink caused by increasing atmospheric CO<sub>2</sub>, *New Phytol.*, 229, 2413–2445, 2021.
- 1545 Wang, J. A., Baccini, A., Farina, M., Randerson, J. T., and Friedl, M. A.: Disturbance suppresses the aboveground carbon sink in North American boreal forests, *Nat. Clim. Change*, 11, 435–441, 2021.
- Wang, J. S., Oda, T., Kawa, S. R., Strode, S. A., Baker, D. F., Ott, L. E., and Pawson, S.: The impacts of fossil fuel emission uncertainties and accounting for 3-D chemical CO<sub>2</sub> production on inverse natural carbon flux estimates from satellite and in situ data, *Environ. Res. Lett.*, 15, 085002, 2020.
- 1550 Warneke, T., Messerschmidt, J., Notholt, J., Weinzierl, C., Deutscher, N. M., Petri, C., and Grupe, P.: TCCON data from Orléans (FR), Release GGG2014.R1, <https://doi.org/10.14291/TCCON.GGG2014.ORLEANS01.R1>, 2019.
- Weir, B., Crisp, D., O'Dell, C. W., Basu, S., Chatterjee, A., Kolassa, J., Oda, T., Pawson, S., Poulter, B., Zhang, Z., et al.: Regional impacts of COVID-19 on carbon dioxide detected worldwide from space, *Science advances*, 7, eabf9415, 2021.
- 1555 Wennberg, P. O., Wunch, D., Roehl, C., Blavier, J.-F., Toon, G. C., and Allen, N.: TCCON data from Caltech (US), Release GGG2014R1, TCCON data archive, hosted by CaltechDATA, <https://doi.org/10.14291/tcon.ggg2014.pasadena01.R1/1182415>, 2014.

- Wennberg, P. O., Roehl, C., Blavier, J.-F., Wunch, D., Landeros, J., and Allen, N.: TCCON data from Jet Propulsion Laboratory (US), 2011, Release GGG2014R1, TCCON data archive, hosted by CaltechDATA, <https://doi.org/10.14291/tcon.ggg2014.jpl02.R1/1330096>, 2016a.
- 1560 Wennberg, P. O., Wunch, D., Roehl, C., Blavier, J.-F., Toon, G. C., Allen, N., Dowell, P., Teske, K., Martin, C., and Martin, J.: TCCON data from Lamont (US), Release GGG2014R1, TCCON data archive, hosted by CaltechDATA, <https://doi.org/10.14291/tcon.ggg2014.lamont01.R1/1255070>, 2016b.
- Wennberg, P. O., Roehl, C. M., Wunch, D., Toon, G. C., Blavier, J.-F., Washenfelder, R., Keppel-Aleks, G., Allen, N. T., and Ayers, J.: TCCON data from Park Falls (US), Release GGG2014.R1, <https://doi.org/10.14291/TCCON.GGG2014.PARKFALLS01.R1>, 2017.
- 1565 Worden, J. R., Cusworth, D. H., Qu, Z., Yin, Y., Zhang, Y., Bloom, A. A., Ma, S., Byrne, B. K., Scarpelli, T., Maasackers, J. D., Crisp, D., Duren, R., and Jacob, D. J.: The 2019 methane budget and uncertainties at 1° resolution and each country through Bayesian integration Of GOSAT total column methane data and a priori inventory estimates, *Atmos. Chem. Phys.*, 22, 6811–6841, <https://doi.org/10.5194/acp-22-6811-2022>, 2022.
- Wunch, D., Toon, G. C., Wennberg, P. O., Wofsy, S. C., Stephens, B. B., Fischer, M. L., Uchino, O., Abshire, J. B., Bernath, P., Biraud, S. C., Blavier, J.-F. L., Boone, C., Bowman, K. P., Browell, E. V., Campos, T., Connor, B. J., Daube, B. C., Deutscher, N. M., Diao, M., Elkins, J. W., Gerbig, C., Gottlieb, E., Griffith, D. W. T., Hurst, D. F., Jiménez, R., Keppel-Aleks, G., Kort, E. A., Macatangay, R., Machida, T., Matsueda, H., Moore, F., Morino, I., Park, S., Robinson, J., Roehl, C. M., Sawa, Y., Sherlock, V., Sweeney, C., Tanaka, T., and Zondlo, M. A.: Calibration of the Total Carbon Column Observing Network using aircraft profile data, *Atmos. Meas. Tech.*, 3, 1351–1362, <https://doi.org/10.5194/amt-3-1351-2010>, 2010.
- 1570 Wunch, D., Toon, G. C., Blavier, J.-F. L., Washenfelder, R. A., Notholt, J., Connor, B. J., Griffith, D. W., Sherlock, V., and Wennberg, P. O.: The Total Carbon Column Observing Network, *Philos. T. Roy. Soc. A*, 369, 2087–2112, <https://doi.org/10.1098/rsta.2010.0240>, 2011.
- Wunch, D., Mendonca, J., Colebatch, O., Allen, N., Blavier, J.-F. L., Roche, S., Hedelius, J. K., Neufeld, G., Springett, S., Worthy, D. E. J., Kessler, R., and Strong, K.: TCCON data from East Trout Lake (CA), Release GGG2014R1, TCCON data archive, hosted by CaltechDATA, <https://doi.org/10.14291/tcon.ggg2014.easttroutlake01.R1>, 2017a.
- 1580 Wunch, D., Wennberg, P. O., Osterman, G., Fisher, B., Naylor, B., Roehl, C. M., O'Dell, C., Mandrake, L., Viatte, C., Kiel, M., Griffith, D. W. T., Deutscher, N. M., Velasco, V. A., Notholt, J., Warneke, T., Petri, C., De Maziere, M., Sha, M. K., Sussmann, R., Rettinger, M., Pollard, D., Robinson, J., Morino, I., Uchino, O., Hase, F., Blumenstock, T., Feist, D. G., Arnold, S. G., Strong, K., Mendonca, J., Kivi, R., Heikkinen, P., Iraci, L., Podolske, J., Hillyard, P. W., Kawakami, S., Dubey, M. K., Parker, H. A., Sepulveda, E., García, O. E., Te, Y., Jeseck, P., Gunson, M. R., Crisp, D., and Eldering, A.: Comparisons of the Orbiting Carbon Observatory-2 (OCO-2)  $X_{CO_2}$  measurements with TCCON, *Atmos. Meas. Tech.*, 10, 2209–2238, <https://doi.org/10.5194/amt-10-2209-2017>, 2017b.
- Yang, D., Liu, Y., Cai, Z., Wang, M., Qiu, L., Yin, Z., Tian, L., and TanSat-2 team: The next generation of Chinese greenhouse gas monitoring satellite mission, 14th International Workshop on Greenhouse Gas Measurements from Space (IWGGMS-14), 2018.
- Yang, Q., Tian, H., Friedrichs, M. A., Hopkinson, C. S., Lu, C., and Najjar, R. G.: Increased nitrogen export from eastern North America to the Atlantic Ocean due to climatic and anthropogenic changes during 1901–2008, *J. Geophys. Res. - Biogeo.*, 120, 1046–1068, 2015.
- 1590 Yao, Y., Tian, H., Shi, H., Pan, S., Xu, R., Pan, N., and Canadell, J. G.: Increased global nitrous oxide emissions from streams and rivers in the Anthropocene, *Nat. Clim. Change*, 10, 138–142, 2020.
- Yao, Y., Tian, H., Pan, S., Najjar, R. G., Friedrichs, M. A., Bian, Z., Li, H.-Y., and Hofmann, E. E.: Riverine carbon cycling over the past century in the Mid-Atlantic region of the United States, *J. Geophys. Res. - Biogeo.*, 126, e2020JG005968, 2021.
- Yin, Y., Ciais, P., Chevallier, F., Van der Werf, G. R., Fanin, T., Broquet, G., Boesch, H., Cozic, A., Hauglustaine, D., Szopa, S., et al.: Variability of fire carbon emissions in equatorial Asia and its nonlinear sensitivity to El Niño, *Geophys. Res. Lett.*, 43, 10–472, 2016.
- 1595

- 1600 Yu, K., Keller, C. A., Jacob, D. J., Molod, A. M., Eastham, S. D., and Long, M. S.: Errors and improvements in the use of archived meteorological data for chemical transport modeling: an analysis using GEOS-Chem v11-01 driven by GEOS-5 meteorology, *Geosci. Model Dev.*, 11, 305–319, <https://doi.org/10.5194/gmd-11-305-2018>, 2018.
- Zammit-Mangion, A., Bertolacci, M., Fisher, J., Stavert, A., Rigby, M., Cao, Y., and Cressie, N.: WOMBAT v1.0: A Fully Bayesian Global Flux-Inversion Framework, *Geosci. Model Dev.*, 15, 45–73, <https://doi.org/10.5194/gmd-15-45-2022>, 2022.
- Zeng, J., Nojiri, Y., Landschützer, P., Telszewski, M., and Nakaoka, S.-I.: A global surface ocean  $f\text{CO}_2$  climatology based on a feed-forward neural network, *J. Atmos. Ocean Tech.*, 31, 1838–1849, 2014.
- Zhang, L., Davis, K. J., Schuh, A. E., Jacobson, A. R., Pal, S., Cui, Y. Y., Baker, D., Crowell, S., Chevallier, F., Remaud, M., et al.: Multi-Season Evaluation of  $\text{CO}_2$  Weather in OCO-2 MIP Models, *J. Geophys. Res.-Atmos.*, 127, e2021JD035457, 2022.
